# Supplementary material for: scRNA-sequencing reveals subtype-specific transcriptomic perturbations in DRG neurons of PirtEGFPf mice in neuropathic pain condition
Source: eLife. 2022 Oct 20;11:e76063. doi: 10.7554/eLife.76063 (PMC9584610; doi:10.7554/eLife.76063)
Supplement: Supplementary file 1. [file elife-76063-supp1.xlsx]

## Sheet: NF1
	NF1.MaleCCI_p_val	NF1.MaleCCI_avg_logFC	NF1.MaleCCI_pct.1	NF1.MaleCCI_pct.2	NF1.MaleCCI_p_val_adj	NF1.MaleSham_p_val	NF1.MaleSham_avg_logFC	NF1.MaleSham_pct.1	NF1.MaleSham_pct.2	NF1.MaleSham_p_val_adj	NF1.FemaleCCI_p_val	NF1.FemaleCCI_avg_logFC	NF1.FemaleCCI_pct.1	NF1.FemaleCCI_pct.2	NF1.FemaleCCI_p_val_adj	NF1.FemaleSham_p_val	NF1.FemaleSham_avg_logFC	NF1.FemaleSham_pct.1	NF1.FemaleSham_pct.2	NF1.FemaleSham_p_val_adj	NF1.max_pval	NF1.minimump_p_val
Slc17a7	0	1.30031	0.956	0.037	0	0	1.59331	0.993	0.034	0	1.14667e-264	1.29241	0.899	0.04	2.23497e-260	0	1.38833	0.968	0.029	0	1.14667e-264	0
Hapln4	1.59096e-268	0.32344	0.726	0.02	3.10094e-264	0	0.419317	0.745	0.017	0	1.31883e-227	0.375775	0.596	0.016	2.57052e-223	0	0.397822	0.67	0.011	0	1.31883e-227	0
Runx3	2.39592e-223	0.386225	0.416	0.003	4.6699e-219	1.92472e-229	0.416187	0.393	0.004	3.75148e-225	3.1528e-266	0.459123	0.461	0.004	6.14513e-262	0	0.287284	0.324	0.003	0	2.39592e-223	0
Gabrg1	2.94525e-222	0.650819	0.752	0.033	5.74058e-218	0	0.312741	0.766	0.025	0	9.01733e-198	0.599132	0.674	0.028	1.75757e-193	0	0.304648	0.654	0.016	0	9.01733e-198	0
Stxbp6	2.33215e-203	0.300724	0.416	0.004	4.5456e-199	1.08355e-216	0.364987	0.428	0.008	2.11195e-212	1.36723e-255	0.292025	0.427	0.003	2.66487e-251	0	0.269854	0.368	0.002	0	2.33215e-203	0
Hs3st2	8.51812e-171	0.622915	0.619	0.03	1.66027e-166	5.15329e-255	0.704015	0.834	0.049	1.00443e-250	2.62817e-230	0.683161	0.674	0.022	5.12256e-226	0	0.630568	0.676	0.031	0	8.51812e-171	0
Kcns1	7.65391e-164	0.481808	0.655	0.039	1.49182e-159	1.04721e-211	0.717707	0.952	0.11	2.04111e-207	6.24494e-135	0.475729	0.663	0.046	1.2172e-130	0	0.635706	0.924	0.08	0	6.24494e-135	0
Fam19a2	4.13619e-155	1.04435	0.92	0.111	8.06184e-151	0	1.12662	0.972	0.061	0	4.47444e-134	0.967956	0.876	0.098	8.72113e-130	0	1.05779	0.951	0.048	0	4.47444e-134	0
Ntng1	3.41672e-145	0.694296	0.664	0.047	6.65953e-141	0	0.927618	0.821	0.032	0	1.94178e-91	0.580724	0.483	0.036	3.78473e-87	0	0.970468	0.865	0.027	0	1.94178e-91	0
Shox2	7.40655e-120	0.736011	0.867	0.133	1.44361e-115	7.74272e-284	0.739603	0.903	0.054	1.50913e-279	1.07794e-104	0.721996	0.787	0.099	2.10101e-100	0	0.610893	0.87	0.037	0	1.07794e-104	0
Baiap2l1	2.1241e-114	0.291006	0.434	0.022	4.14009e-110	7.78056e-197	0.613209	0.628	0.036	1.51651e-192	6.26954e-87	0.272527	0.348	0.018	1.222e-82	0	0.545575	0.654	0.028	0	6.26954e-87	0
Kcnq3	7.31077e-88	0.759001	0.894	0.204	1.42494e-83	0	0.799253	0.91	0.04	0	6.30135e-57	0.618683	0.764	0.174	1.2282e-52	0	0.865927	0.892	0.037	0	6.30135e-57	0
Rasl10b	3.77034e-85	0.3916	0.885	0.189	7.34878e-81	0	0.488262	0.924	0.04	0	5.2161e-62	0.34935	0.764	0.154	1.01667e-57	0	0.375515	0.741	0.031	0	5.2161e-62	0
Lgi2	4.21487e-60	0.508176	0.903	0.294	8.2152e-56	9.26682e-255	0.891178	0.972	0.088	1.8062e-250	1.783e-42	0.514561	0.798	0.254	3.47524e-38	0	0.862515	0.968	0.075	0	1.783e-42	0
Rasgrf2	1.32491e-34	0.556117	0.85	0.358	2.58238e-30	1.01248e-267	0.36919	0.793	0.037	1.97343e-263	4.81696e-35	0.653618	0.843	0.31	9.38873e-31	0	0.391935	0.751	0.042	0	1.32491e-34	0
Cbln2	1.41761e-114	1.31903	0.947	0.192	2.76306e-110	3.85955e-223	1.37313	0.917	0.092	7.52266e-219	1.07299e-78	1.3437	0.82	0.162	2.09137e-74	6.83816e-301	1.1757	0.865	0.078	1.33283e-296	1.07299e-78	2.73526e-300
Frmpd4	1.65226e-168	0.358296	0.69	0.041	3.22042e-164	7.96746e-236	0.46691	0.931	0.079	1.55294e-231	5.75382e-166	0.393292	0.697	0.039	1.12148e-161	7.16613e-291	0.395112	0.795	0.059	1.39675e-286	5.75382e-166	2.86645e-290
Hoxb9	1.80409e-41	0.458545	0.823	0.288	3.51634e-37	3.93551e-200	0.51378	0.71	0.047	7.67071e-196	4.66742e-25	0.396592	0.663	0.244	9.09726e-21	3.09847e-286	0.52194	0.708	0.045	6.03923e-282	4.66742e-25	1.23939e-285
Vsnl1	7.63971e-166	1.20437	0.938	0.101	1.48906e-161	1.26148e-191	1.57028	0.972	0.141	2.45875e-187	1.03323e-130	1.33713	0.876	0.1	2.01387e-126	1.00122e-285	1.43946	0.984	0.121	1.95148e-281	1.03323e-130	4.00488e-285
Lgi3	4.80958e-104	0.85857	0.788	0.115	9.37436e-100	3.213e-195	1.12455	0.979	0.128	6.26246e-191	1.31992e-104	0.794553	0.775	0.093	2.57266e-100	1.5611e-284	0.990325	0.968	0.111	3.04274e-280	4.80958e-104	6.2444e-284
Slco5a1	1.94132e-51	0.263903	0.779	0.224	3.78382e-47	5.97138e-204	0.397852	0.938	0.103	1.16388e-199	5.02596e-49	0.277185	0.764	0.185	9.79609e-45	2.56411e-283	0.40922	0.886	0.083	4.9977e-279	5.02596e-49	1.02564e-282
Efnb2	3.08727e-97	0.384424	0.814	0.13	6.01739e-93	9.56653e-200	0.497478	0.945	0.106	1.86461e-195	8.76404e-71	0.33304	0.753	0.125	1.7082e-66	1.87028e-253	0.397922	0.892	0.096	3.64536e-249	8.76404e-71	7.48111e-253
Htr1d	4.01804e-66	0.357958	0.796	0.183	7.83156e-62	1.23409e-203	0.62156	0.952	0.112	2.40536e-199	5.32554e-58	0.36255	0.775	0.163	1.038e-53	6.41967e-253	0.548007	0.919	0.109	1.25126e-248	5.32554e-58	2.56787e-252
Rem2	7.37667e-89	0.328058	0.478	0.041	1.43779e-84	3.45536e-179	0.374161	0.897	0.099	6.73484e-175	6.18046e-80	0.293217	0.461	0.037	1.20463e-75	2.94141e-252	0.564874	0.805	0.076	5.7331e-248	6.18046e-80	1.17656e-251
Pcdh7	6.4896e-135	0.68764	0.92	0.12	1.26489e-130	2.23358e-169	0.811632	0.979	0.154	4.35348e-165	2.04141e-92	0.574761	0.843	0.124	3.9789e-88	7.24783e-249	0.749535	0.968	0.126	1.41268e-244	2.04141e-92	2.89913e-248
Epn3	3.04071e-120	0.464124	0.841	0.114	5.92664e-116	1.10317e-199	0.560709	0.952	0.115	2.15019e-195	4.71829e-110	0.454551	0.787	0.089	9.19642e-106	1.47781e-243	0.49083	0.881	0.103	2.88039e-239	4.71829e-110	5.91123e-243
Gda	5.94562e-78	0.572588	0.752	0.135	1.15886e-73	2.48855e-136	0.725237	0.8	0.107	4.85044e-132	2.45593e-61	0.503103	0.663	0.108	4.78685e-57	8.02612e-229	0.780338	0.849	0.096	1.56437e-224	2.45593e-61	3.21045e-228
Mdga1	1.90803e-64	0.350987	0.699	0.148	3.71895e-60	6.78868e-214	0.369848	0.593	0.026	1.32318e-209	1.42896e-67	0.398692	0.708	0.119	2.78519e-63	5.61662e-200	0.269891	0.508	0.033	1.09474e-195	1.90803e-64	2.71547e-213
Car2	2.95652e-99	0.916959	0.92	0.196	5.76255e-95	5.76453e-146	1.05954	0.966	0.191	1.12356e-141	4.35695e-85	0.839742	0.91	0.179	8.49212e-81	2.73379e-207	0.862376	0.93	0.154	5.32843e-203	4.35695e-85	1.09352e-206
Slitrk4	5.10623e-89	0.349657	0.743	0.116	9.95255e-85	1.47493e-138	0.581787	0.931	0.179	2.87478e-134	1.12559e-99	0.360134	0.697	0.075	2.19389e-95	1.28262e-205	0.532304	0.881	0.127	2.49995e-201	5.10623e-89	5.13048e-205
Spp1	8.101e-118	1.12693	0.575	0.044	1.57897e-113	1.23404e-152	0.445822	0.455	0.021	2.40528e-148	1.0314e-116	1.60053	0.539	0.034	2.0103e-112	4.01179e-200	0.46121	0.4	0.017	7.81938e-196	1.0314e-116	1.60472e-199
Kcna1	8.17345e-67	0.865995	0.973	0.501	1.59309e-62	2.76262e-138	1.06439	0.979	0.235	5.38462e-134	9.46095e-58	0.995745	0.978	0.458	1.84403e-53	3.4679e-198	1.07898	0.978	0.205	6.75929e-194	9.46095e-58	1.38716e-197
Sh3bgr	6.43348e-65	0.650673	0.681	0.147	1.25395e-60	3.20518e-103	0.61744	0.503	0.051	6.24722e-99	3.93175e-68	0.558385	0.697	0.116	7.66338e-64	8.78591e-185	0.580028	0.497	0.035	1.71246e-180	6.43348e-65	3.51436e-184
Kcnk1	6.88686e-63	0.728331	0.85	0.264	1.34232e-58	1.34699e-122	1.06234	0.972	0.289	2.62541e-118	4.7961e-58	0.876689	0.82	0.226	9.34807e-54	1.85778e-181	0.932843	0.951	0.207	3.621e-177	4.7961e-58	7.43113e-181
Atp2b2	4.67813e-87	1.07071	0.982	0.286	9.11814e-83	2.05489e-143	1.23998	1	0.234	4.00518e-139	3.80321e-57	0.926019	0.899	0.281	7.41284e-53	4.26372e-180	1.13793	0.995	0.235	8.31042e-176	3.80321e-57	1.70549e-179
Rasgrp2	4.91725e-113	0.732165	0.425	0.021	9.58422e-109	5.84996e-126	0.823733	0.545	0.047	1.14022e-121	1.13637e-134	0.600934	0.416	0.014	2.2149e-130	7.26949e-180	0.666585	0.438	0.026	1.4169e-175	4.91725e-113	2.9078e-179
Scn1a	1.22884e-108	0.744003	0.894	0.145	2.39514e-104	2.68313e-129	0.857087	0.972	0.219	5.22968e-125	4.86048e-84	0.682072	0.82	0.133	9.47356e-80	3.75076e-175	0.741801	0.968	0.196	7.3106e-171	4.86048e-84	1.5003e-174
Crim1	7.08459e-44	0.31038	0.646	0.164	1.38086e-39	1.33334e-146	0.327457	0.793	0.092	2.59881e-142	2.41282e-51	0.304373	0.697	0.14	4.70284e-47	6.40593e-169	0.276766	0.676	0.075	1.24858e-164	7.08459e-44	2.56237e-168
Scn4b	2.6853e-102	0.624973	0.858	0.145	5.23393e-98	7.75835e-116	0.907132	0.979	0.271	1.51218e-111	7.61541e-76	0.562709	0.775	0.128	1.48432e-71	9.49139e-166	0.798525	0.962	0.218	1.84997e-161	7.61541e-76	3.79655e-165
Sv2b	1.41256e-85	0.888011	0.947	0.233	2.75323e-81	1.46773e-124	0.973454	0.986	0.242	2.86076e-120	5.37828e-71	0.839474	0.888	0.195	1.04828e-66	3.42846e-165	0.923385	0.989	0.232	6.68242e-161	5.37828e-71	1.37139e-164
Clstn2	1.55984e-77	0.46944	0.912	0.264	3.04029e-73	6.84654e-127	0.605626	0.966	0.239	1.33446e-122	3.70707e-61	0.458556	0.831	0.214	7.22546e-57	3.27348e-163	0.597438	0.946	0.216	6.38034e-159	3.70707e-61	1.30939e-162
Shh	2.02676e-109	0.27062	0.779	0.097	3.95036e-105	3.93312e-157	0.342587	0.89	0.117	7.66604e-153	2.08027e-76	0.256437	0.73	0.102	4.05466e-72	1.67982e-162	0.284791	0.778	0.104	3.27413e-158	2.08027e-76	6.71927e-162
Cadps2	1.75404e-50	0.63391	0.407	0.057	3.4188e-46	2.42265e-84	1.00082	0.607	0.109	4.72198e-80	2.91646e-43	0.570078	0.393	0.053	5.68448e-39	4.25129e-159	0.950815	0.632	0.078	8.28619e-155	2.91646e-43	1.70052e-158
Fat3	6.94461e-103	0.394449	0.858	0.136	1.35357e-98	3.71345e-132	0.447798	0.952	0.173	7.23789e-128	2.57895e-66	0.340897	0.775	0.136	5.02664e-62	2.18217e-158	0.412242	0.903	0.158	4.25327e-154	2.57895e-66	8.72868e-158
Frrs1l	1.51486e-59	0.318791	0.743	0.173	2.95261e-55	2.72106e-125	0.438774	0.876	0.152	5.30362e-121	1.72823e-53	0.350645	0.685	0.139	3.36849e-49	4.21731e-157	0.407177	0.8	0.127	8.21996e-153	1.72823e-53	1.68692e-156
Chn2	1.6712e-36	0.323824	0.69	0.236	3.25734e-32	2.88763e-152	0.499472	0.869	0.118	5.62828e-148	3.36748e-28	0.351655	0.64	0.222	6.56355e-24	4.47837e-139	0.410025	0.741	0.12	8.7288e-135	3.36748e-28	1.15505e-151
Ppm1e	4.53665e-67	0.470473	0.903	0.272	8.84239e-63	2.28258e-118	0.640265	0.952	0.234	4.44898e-114	3.65856e-50	0.401931	0.82	0.22	7.13091e-46	5.09197e-152	0.610757	0.951	0.214	9.92477e-148	3.65856e-50	2.03679e-151
Scn8a	1.68664e-63	0.946559	0.947	0.454	3.28743e-59	1.44698e-113	1.12571	1	0.362	2.8203e-109	1.12201e-49	0.96775	0.899	0.379	2.18691e-45	2.15838e-151	1.04865	0.989	0.323	4.2069e-147	1.12201e-49	8.63353e-151
Adcy1	4.48013e-62	0.331579	0.708	0.146	8.73222e-58	3.35351e-124	0.393345	0.917	0.168	6.53633e-120	1.43465e-48	0.2571	0.652	0.129	2.79627e-44	2.51947e-151	0.385737	0.859	0.156	4.9107e-147	1.43465e-48	1.00779e-150
Cpne6	1.4037e-78	0.804698	0.973	0.311	2.73596e-74	2.01995e-110	0.804294	0.972	0.246	3.93708e-106	1.41139e-54	0.763703	0.899	0.286	2.75094e-50	4.43434e-149	0.900152	0.962	0.248	8.64298e-145	1.41139e-54	1.77374e-148

## Sheet: NF2
	NF2.MaleCCI_p_val	NF2.MaleCCI_avg_logFC	NF2.MaleCCI_pct.1	NF2.MaleCCI_pct.2	NF2.MaleCCI_p_val_adj	NF2.MaleSham_p_val	NF2.MaleSham_avg_logFC	NF2.MaleSham_pct.1	NF2.MaleSham_pct.2	NF2.MaleSham_p_val_adj	NF2.FemaleCCI_p_val	NF2.FemaleCCI_avg_logFC	NF2.FemaleCCI_pct.1	NF2.FemaleCCI_pct.2	NF2.FemaleCCI_p_val_adj	NF2.FemaleSham_p_val	NF2.FemaleSham_avg_logFC	NF2.FemaleSham_pct.1	NF2.FemaleSham_pct.2	NF2.FemaleSham_p_val_adj	NF2.max_pval	NF2.minimump_p_val
Sema5a	1.00326e-176	0.938328	0.967	0.079	1.95546e-172	3.80508e-188	1.23323	0.973	0.065	7.41649e-184	6.97658e-238	0.8887	0.912	0.067	1.3598e-233	6.87425e-276	1.13621	0.972	0.066	1.33986e-271	1.00326e-176	2.7497e-275
Snhg18	2.59523e-180	0.343604	0.9	0.059	5.05837e-176	1.51912e-137	0.408995	0.849	0.064	2.96091e-133	1.7441e-258	0.381753	0.864	0.048	3.39942e-254	1.47511e-193	0.357812	0.757	0.053	2.87513e-189	1.51912e-137	6.97638e-258
Rasgrf2	8.57834e-50	0.713469	0.978	0.358	1.672e-45	1.85491e-171	0.676698	0.863	0.052	3.6154e-167	5.59691e-81	0.95	0.944	0.301	1.09089e-76	5.36171e-258	0.63445	0.85	0.05	1.04505e-253	8.57834e-50	2.14469e-257
Fam19a1	1.84084e-52	0.68903	0.867	0.254	3.58797e-48	1.67508e-152	1.12759	0.986	0.09	3.2649e-148	4.84045e-96	0.736104	0.928	0.225	9.43452e-92	4.35577e-230	1.07662	0.963	0.083	8.48983e-226	1.84084e-52	1.74231e-229
Ddr2	4.28392e-76	0.394424	0.878	0.166	8.3498e-72	2.37678e-206	0.331403	0.863	0.038	4.63257e-202	1.66711e-108	0.48877	0.832	0.138	3.24936e-104	1.6049e-227	0.344848	0.71	0.037	3.12811e-223	4.28392e-76	6.41959e-227
Gm4208	4.10823e-60	0.598645	0.833	0.189	8.00735e-56	1.51364e-222	0.256434	0.603	0.013	2.95023e-218	2.19518e-86	0.736069	0.824	0.177	4.27862e-82	1.72888e-189	0.310774	0.505	0.021	3.36976e-185	4.10823e-60	6.05454e-222
Rasl10b	2.53945e-48	0.268276	0.8	0.198	4.94963e-44	1.58912e-149	0.426925	0.877	0.06	3.09735e-145	1.90965e-67	0.250449	0.712	0.15	3.72211e-63	2.12326e-215	0.318969	0.729	0.041	4.13845e-211	2.53945e-48	8.49305e-215
Gstm2	6.33214e-74	0.422165	0.533	0.054	1.2342e-69	6.50026e-130	0.604672	0.63	0.035	1.26697e-125	1.58677e-139	0.443182	0.592	0.046	3.09277e-135	2.67033e-214	0.743554	0.645	0.033	5.20474e-210	6.33214e-74	1.06813e-213
Chp2	1.13679e-100	0.745408	0.722	0.076	2.21573e-96	1.65663e-126	0.777902	0.849	0.075	3.22894e-122	5.17715e-113	0.642859	0.64	0.07	1.00908e-108	2.98089e-182	0.650668	0.822	0.07	5.81005e-178	1.13679e-100	1.19235e-181
Cgnl1	7.11118e-118	0.533878	0.922	0.111	1.38604e-113	2.89226e-103	0.70618	0.945	0.125	5.6373e-99	4.47346e-172	0.506976	0.88	0.089	8.71923e-168	6.5435e-132	0.614785	0.888	0.121	1.27539e-127	2.89226e-103	1.78939e-171
Fgf9	1.07946e-84	0.312124	0.856	0.138	2.10397e-80	2.24338e-93	0.427655	0.877	0.117	4.37258e-89	8.39436e-104	0.309236	0.744	0.112	1.63614e-99	1.88373e-138	0.319241	0.776	0.083	3.67158e-134	1.07946e-84	7.53492e-138
Htr3a	5.26534e-39	0.424046	0.5	0.089	1.02627e-34	1.05315e-96	1.04981	1	0.157	2.05269e-92	4.54779e-42	0.4751	0.376	0.063	8.8641e-38	1.06394e-122	0.922206	0.935	0.152	2.07373e-118	5.26534e-39	4.25577e-122
Lgi3	1.6017e-64	0.36245	0.744	0.122	3.12187e-60	2.51613e-81	0.657474	0.945	0.148	4.90418e-77	3.79961e-96	0.288074	0.68	0.09	7.40581e-92	2.86589e-119	0.531367	0.888	0.124	5.5859e-115	1.6017e-64	1.14636e-118
Chn2	1.81095e-35	0.360179	0.744	0.238	3.52972e-31	2.10126e-83	0.597725	0.89	0.134	4.09557e-79	2.09214e-66	0.501728	0.784	0.212	4.07778e-62	4.17817e-114	0.591676	0.832	0.127	8.14367e-110	1.81095e-35	1.67127e-113
Vsnl1	3.62461e-74	0.601714	0.767	0.113	7.06472e-70	3.48146e-64	0.75549	0.877	0.161	6.78572e-60	4.33828e-114	0.607975	0.752	0.096	8.45574e-110	7.64976e-114	0.960936	0.869	0.135	1.49101e-109	3.48146e-64	1.73531e-113
Gm5	4.07872e-61	0.331192	0.6	0.088	7.94982e-57	9.1166e-99	0.540497	0.836	0.098	1.77692e-94	9.10001e-45	0.258357	0.424	0.076	1.77368e-40	7.53331e-111	0.460653	0.766	0.106	1.46832e-106	9.10001e-45	3.01332e-110
Creb5	3.83347e-44	0.41795	0.889	0.294	7.47182e-40	3.49384e-98	0.45578	0.918	0.107	6.80985e-94	6.00139e-75	0.625001	0.848	0.246	1.16973e-70	2.20135e-110	0.431547	0.832	0.111	4.29066e-106	3.83347e-44	8.80542e-110
Serpinb1a	2.07156e-30	0.930534	1	0.62	4.03767e-26	2.76172e-85	1.46904	0.986	0.196	5.38287e-81	4.49062e-34	0.926959	0.968	0.629	8.75267e-30	1.56182e-105	1.33933	0.944	0.206	3.04415e-101	2.07156e-30	6.24729e-105
S100a16	5.66767e-50	0.929872	0.722	0.175	1.10469e-45	9.10013e-89	1.4154	0.959	0.164	1.77371e-84	1.74273e-95	0.906188	0.784	0.145	3.39676e-91	2.37952e-105	1.19772	0.869	0.162	4.63792e-101	5.66767e-50	9.51808e-105
Nrp2	5.07878e-69	0.987537	0.989	0.297	9.89905e-65	1.29001e-60	1.06508	0.973	0.28	2.51436e-56	6.65565e-103	1.04294	0.968	0.253	1.29725e-98	1.18601e-88	1.04808	0.972	0.281	2.31166e-84	1.29001e-60	2.66226e-102
Sv2b	3.29483e-64	0.646306	0.967	0.239	6.42196e-60	3.93897e-62	0.917082	0.986	0.258	7.67745e-58	2.3289e-99	0.629188	0.936	0.186	4.53926e-95	3.80441e-88	0.854009	0.972	0.243	7.41518e-84	3.93897e-62	9.3156e-99
Cpne6	2.34187e-71	0.921459	1	0.316	4.56455e-67	2.01535e-61	0.93759	0.973	0.262	3.92812e-57	3.18174e-99	0.757931	0.992	0.277	6.20153e-95	3.85183e-85	0.820702	0.972	0.258	7.50759e-81	2.01535e-61	1.2727e-98
Chst2	3.6468e-09	0.297302	0.967	0.624	7.10798e-05	1.38208e-73	0.607734	0.945	0.192	2.69381e-69	7.46082e-24	0.54154	0.992	0.609	1.45419e-19	8.42736e-97	0.595846	0.925	0.188	1.64258e-92	3.6468e-09	3.37094e-96
Prokr2	3.02674e-45	0.346115	0.678	0.135	5.89942e-41	3.36728e-95	0.395572	0.616	0.046	6.56316e-91	3.51693e-45	0.323561	0.544	0.116	6.85486e-41	2.06874e-75	0.324273	0.458	0.049	4.03218e-71	3.51693e-45	1.34691e-94
Trappc3l	6.17404e-80	1.51544	0.911	0.203	1.20338e-75	1.16637e-79	1.8157	1	0.232	2.27338e-75	1.54518e-64	1.23803	0.744	0.199	3.01171e-60	4.94906e-95	1.57997	0.935	0.225	9.64621e-91	1.54518e-64	1.97962e-94
Zfp503	3.4509e-44	0.285975	0.811	0.217	6.72616e-40	1.13376e-56	0.297157	0.849	0.173	2.20982e-52	2.23863e-56	0.252854	0.712	0.174	4.36331e-52	7.92196e-94	0.309526	0.804	0.13	1.54407e-89	3.4509e-44	3.16878e-93
Thy1	1.12977e-58	1.63608	1	0.666	2.20202e-54	4.81922e-68	2.32014	1	0.313	9.39313e-64	3.2166e-79	1.62307	1	0.658	6.26947e-75	2.18919e-92	2.186	1	0.351	4.26695e-88	1.12977e-58	8.75676e-92
Serpinb1b	1.69498e-53	0.654357	0.756	0.162	3.30368e-49	3.62205e-78	0.969095	0.918	0.175	7.05975e-74	9.55621e-57	0.498364	0.648	0.143	1.8626e-52	4.78411e-91	0.829131	0.841	0.169	9.3247e-87	1.69498e-53	1.91364e-90
Prkcb	2.48292e-65	0.843936	0.989	0.263	4.83945e-61	1.42072e-63	1.21736	0.986	0.308	2.76913e-59	2.78082e-87	0.7366	0.944	0.237	5.4201e-83	7.77403e-85	1.10651	1	0.338	1.51524e-80	1.42072e-63	1.11233e-86
Nptx1	1.80717e-23	0.8367	0.567	0.206	3.52235e-19	8.92156e-57	1.2603	0.973	0.356	1.7389e-52	4.25316e-27	0.684543	0.552	0.202	8.28983e-23	7.9678e-84	1.08636	0.972	0.328	1.553e-79	1.80717e-23	3.18712e-83
Nfia	4.57964e-46	0.629371	0.967	0.38	8.92618e-42	8.69854e-47	1.01197	0.959	0.398	1.69543e-42	3.19994e-72	0.687314	0.944	0.303	6.237e-68	2.82548e-78	1.00622	0.991	0.36	5.50715e-74	4.57964e-46	1.13019e-77
Cplx2	1.29449e-15	0.876575	0.756	0.452	2.5231e-11	9.38777e-51	1.48458	0.986	0.491	1.82977e-46	1.18222e-27	0.750955	0.768	0.403	2.30426e-23	1.44399e-74	1.1953	0.991	0.434	2.81449e-70	1.29449e-15	5.77598e-74
Ptk2b	4.10783e-59	0.525191	0.9	0.229	8.00657e-55	8.37231e-64	0.738256	0.918	0.205	1.63185e-59	2.27673e-64	0.585391	0.84	0.247	4.43756e-60	1.53491e-74	0.653364	0.916	0.241	2.99169e-70	4.10783e-59	6.13964e-74
Hopx	3.71087e-56	2.00599	1	0.652	7.23286e-52	2.38456e-41	2.08999	0.973	0.702	4.64775e-37	1.00647e-73	1.78851	1	0.656	1.9617e-69	4.9167e-67	1.80971	1	0.728	9.58314e-63	2.38456e-41	4.02586e-73
Ly6h	2.70178e-28	1.07842	0.6	0.182	5.26603e-24	1.52158e-62	1.53725	1	0.319	2.9657e-58	3.93047e-28	0.973239	0.536	0.181	7.66087e-24	3.8397e-73	1.46146	0.944	0.334	7.48396e-69	3.93047e-28	1.53588e-72
S100b	6.8732e-43	1.58059	0.944	0.43	1.33966e-38	1.4765e-49	2.10734	1	0.499	2.87784e-45	1.02646e-52	1.51153	0.904	0.371	2.00068e-48	6.51497e-72	1.96606	1	0.484	1.26983e-67	6.8732e-43	2.60599e-71
Parva	2.19413e-36	0.811176	0.989	0.585	4.27658e-32	2.63897e-45	1.23032	0.973	0.577	5.14362e-41	1.08207e-45	0.735076	0.96	0.552	2.10907e-41	2.53903e-68	1.14427	1	0.565	4.94882e-64	2.19413e-36	1.01561e-67
Cntn1	3.66063e-47	0.897557	1	0.499	7.13493e-43	2.6562e-40	1.00279	0.986	0.457	5.17721e-36	2.01496e-63	0.851037	0.992	0.449	3.92736e-59	2.60919e-62	1.09551	0.981	0.431	5.08557e-58	2.6562e-40	8.05984e-63
Scn8a	4.49736e-35	0.510378	0.944	0.458	8.7658e-31	4.29193e-48	0.80917	0.986	0.376	8.36539e-44	4.99069e-49	0.487845	0.904	0.374	9.72735e-45	2.62023e-63	0.717723	0.935	0.333	5.10709e-59	4.49736e-35	1.04809e-62
Paqr9	2.87556e-42	0.734545	0.989	0.655	5.60475e-38	6.61564e-50	1.07604	0.986	0.508	1.28945e-45	1.45025e-53	0.746771	0.992	0.61	2.82669e-49	1.16565e-62	0.959694	0.963	0.498	2.27197e-58	2.87556e-42	4.6626e-62
Pcolce2	1.50459e-26	0.457101	0.978	0.565	2.9326e-22	4.2688e-44	0.698827	0.932	0.364	8.32031e-40	3.12999e-39	0.529067	0.936	0.517	6.10066e-35	2.0125e-62	0.650439	0.907	0.34	3.92256e-58	1.50459e-26	8.04998e-62
D930028M14Rik	1.7539e-46	0.920703	0.956	0.529	3.41853e-42	1.83849e-36	0.853664	0.932	0.544	3.58341e-32	2.547e-61	0.822901	0.96	0.483	4.96435e-57	7.19285e-51	0.780753	0.925	0.509	1.40196e-46	1.83849e-36	1.0188e-60
Elfn1	2.32393e-38	0.424382	0.956	0.449	4.52957e-34	4.62717e-41	0.527052	0.932	0.35	9.01881e-37	4.0895e-56	0.421216	0.96	0.401	7.97084e-52	4.26769e-61	0.538031	0.944	0.329	8.31816e-57	2.32393e-38	1.70708e-60
Fgf12	2.3342e-30	1.33931	0.989	0.842	4.5496e-26	2.26978e-44	1.75381	0.986	0.812	4.42404e-40	1.60753e-43	1.07299	0.976	0.786	3.13324e-39	8.13577e-61	1.57873	0.991	0.782	1.58574e-56	2.3342e-30	3.25431e-60
Ngfr	1.07145e-35	1.1224	0.989	0.699	2.08836e-31	1.62556e-43	1.45041	0.986	0.641	3.16837e-39	2.91215e-42	1.00166	1	0.712	5.67607e-38	3.16386e-59	1.22582	0.991	0.672	6.16668e-55	1.07145e-35	1.26554e-58
Cyp1b1	2.0313e-46	0.494438	0.944	0.292	3.9592e-42	2.39744e-38	0.530863	0.918	0.258	4.67284e-34	9.29629e-59	0.601399	0.944	0.325	1.81194e-54	1.36515e-38	0.398503	0.832	0.27	2.66081e-34	2.39744e-38	3.71852e-58
Syt2	2.335e-50	0.563094	0.956	0.287	4.55114e-46	1.06622e-35	0.655448	0.959	0.386	2.07817e-31	1.01996e-57	0.50592	0.896	0.265	1.98801e-53	4.41802e-45	0.595236	0.944	0.358	8.61116e-41	1.06622e-35	4.07986e-57
Gpr158	1.34775e-35	0.565747	0.989	0.667	2.62691e-31	6.39303e-49	0.693133	0.973	0.347	1.24607e-44	5.23972e-47	0.622782	0.976	0.641	1.02127e-42	1.22471e-57	0.605763	0.925	0.351	2.38709e-53	1.34775e-35	4.89885e-57
Tagln3	1.45194e-46	1.06271	1	0.786	2.82997e-42	2.22174e-41	1.20791	1	0.792	4.33039e-37	5.10821e-57	1.01009	1	0.793	9.95641e-53	1.37948e-51	1.01558	1	0.838	2.68875e-47	2.22174e-41	2.04328e-56
Tm9sf2	9.2995e-09	0.514429	0.978	0.89	0.000181257	4.96196e-42	0.829415	1	0.868	9.67137e-38	9.58943e-10	0.372976	0.92	0.85	1.86908e-05	2.4762e-56	0.830491	0.991	0.861	4.82635e-52	9.2995e-09	9.90478e-56

## Sheet: NP1
	NP1.MaleCCI_p_val	NP1.MaleCCI_avg_logFC	NP1.MaleCCI_pct.1	NP1.MaleCCI_pct.2	NP1.MaleCCI_p_val_adj	NP1.MaleSham_p_val	NP1.MaleSham_avg_logFC	NP1.MaleSham_pct.1	NP1.MaleSham_pct.2	NP1.MaleSham_p_val_adj	NP1.FemaleCCI_p_val	NP1.FemaleCCI_avg_logFC	NP1.FemaleCCI_pct.1	NP1.FemaleCCI_pct.2	NP1.FemaleCCI_p_val_adj	NP1.FemaleSham_p_val	NP1.FemaleSham_avg_logFC	NP1.FemaleSham_pct.1	NP1.FemaleSham_pct.2	NP1.FemaleSham_p_val_adj	NP1.max_pval	NP1.minimump_p_val
Nppb	0	1.37481	0.934	0.022	0	0	2.54317	1	0.021	0	0	1.22223	0.912	0.014	0	0	2.2838	0.99	0.022	0	0	0
Htr1f	2.14974e-227	0.83728	0.893	0.059	4.19007e-223	0	1.45356	0.977	0.031	0	0	0.772564	0.89	0.038	0	0	1.25181	0.942	0.026	0	2.14974e-227	0
Ptprk	2.35797e-224	0.431386	0.828	0.046	4.59593e-220	1.04215e-265	0.803913	0.92	0.039	2.03125e-261	4.50315e-232	0.298535	0.728	0.038	8.77709e-228	0	0.700173	0.883	0.033	0	2.35797e-224	0
Cysltr2	2.85675e-191	0.602733	0.779	0.052	5.56809e-187	2.86261e-232	1.14814	1	0.063	5.57952e-228	1.15104e-183	0.436632	0.64	0.041	2.24348e-179	0	1.09308	0.951	0.047	0	1.15104e-183	0
Il31ra	3.94496e-171	0.870273	0.721	0.051	7.68911e-167	0	1.48511	0.977	0.03	0	4.85314e-258	0.798136	0.779	0.042	9.45926e-254	0	1.21603	0.903	0.019	0	3.94496e-171	0
Gm525	1.10955e-138	0.673256	0.492	0.023	2.16262e-134	0	1.71703	0.943	0.029	0	2.64884e-129	0.5576	0.412	0.021	5.16285e-125	0	1.38986	0.835	0.035	0	2.64884e-129	0
Cmtm7	2.04187e-114	0.530532	0.959	0.209	3.97981e-110	1.08078e-245	0.858551	0.977	0.053	2.10655e-241	1.12079e-140	0.567734	0.926	0.165	2.18453e-136	0	0.645313	0.951	0.042	0	2.04187e-114	0
Sst	9.67094e-80	1.32914	0.189	0.004	1.88496e-75	0	2.52095	0.943	0.007	0	8.68383e-89	0.916335	0.162	0.003	1.69257e-84	0	2.19641	0.757	0.005	0	9.67094e-80	0
Gm47595	9.63302e-67	0.393103	0.91	0.284	1.87757e-62	4.29377e-281	0.3336	0.724	0.017	8.36899e-277	2.16634e-83	0.39414	0.882	0.236	4.22242e-79	0	0.315831	0.728	0.019	0	9.63302e-67	0
Ildr2	3.10191e-48	0.42507	0.943	0.414	6.04594e-44	9.41347e-255	0.592848	0.862	0.034	1.83478e-250	3.06551e-63	0.456936	0.963	0.368	5.97498e-59	3.13551e-304	0.580881	0.874	0.04	6.11143e-300	3.10191e-48	1.25421e-303
Cmtm8	2.90893e-67	0.413542	0.598	0.098	5.6698e-63	1.09197e-243	0.974803	0.92	0.046	2.12837e-239	8.66992e-74	0.356569	0.588	0.097	1.68985e-69	1.71435e-288	0.916616	0.913	0.051	3.34143e-284	2.90893e-67	6.85738e-288
Ada	8.04376e-72	0.323161	0.648	0.112	1.56781e-67	5.316e-179	0.928208	0.943	0.078	1.03614e-174	1.34313e-87	0.27423	0.588	0.082	2.61789e-83	5.44566e-209	0.780796	0.903	0.075	1.06141e-204	8.04376e-72	2.17826e-208
Nts	3.7249e-37	1.00182	1	0.654	7.26021e-33	6.21553e-198	2.45237	0.989	0.073	1.21147e-193	1.14852e-45	1.15763	0.993	0.675	2.23858e-41	6.97758e-152	2.75353	0.961	0.127	1.36e-147	3.7249e-37	2.48621e-197
Cavin1	1.44403e-79	0.680701	0.959	0.312	2.81457e-75	8.9444e-113	0.436652	0.77	0.078	1.74335e-108	1.28383e-96	0.653316	0.971	0.275	2.50231e-92	7.34484e-155	0.633765	0.806	0.078	1.43158e-150	1.44403e-79	2.93794e-154
Npy2r	2.82382e-111	0.845411	1	0.227	5.5039e-107	6.21349e-129	1.37989	0.977	0.14	1.21107e-124	3.15342e-112	0.811755	0.971	0.227	6.14633e-108	3.5028e-146	1.22435	0.971	0.15	6.8273e-142	2.82382e-111	1.40112e-145
Stom	1.19056e-82	0.630945	0.959	0.319	2.32052e-78	2.78569e-86	0.413198	0.862	0.142	5.42958e-82	4.96639e-106	0.650673	0.978	0.267	9.67999e-102	3.15444e-119	0.469614	0.845	0.115	6.14832e-115	1.19056e-82	1.26178e-118
Plaur	1.37986e-32	0.546853	0.861	0.483	2.68949e-28	3.53534e-45	0.38068	0.575	0.105	6.89073e-41	9.88287e-43	0.551151	0.897	0.435	1.92627e-38	4.70731e-99	0.633499	0.748	0.105	9.17501e-95	1.37986e-32	1.88292e-98
Tesc	9.06688e-77	1.05318	1	0.456	1.76723e-72	1.23891e-79	1.63649	1	0.295	2.41477e-75	7.48242e-90	1.05588	1	0.431	1.4584e-85	2.25184e-94	1.54325	1	0.298	4.38907e-90	9.06688e-77	9.00737e-94
Osmr	9.77843e-80	0.79576	0.992	0.308	1.90591e-75	3.10969e-82	1.45042	1	0.275	6.0611e-78	6.649e-92	0.693976	0.993	0.296	1.29596e-87	1.92144e-92	1.2726	0.99	0.288	3.74508e-88	9.77843e-80	7.68575e-92
Fam210b	4.78918e-60	0.561717	0.967	0.448	9.33459e-56	9.86301e-82	0.654244	0.931	0.208	1.9224e-77	1.17481e-73	0.634974	0.956	0.394	2.28983e-69	3.27321e-89	0.585816	0.922	0.211	6.3798e-85	4.78918e-60	1.30928e-88
Gpr139	1.09687e-35	0.397806	0.73	0.266	2.1379e-31	4.64684e-76	0.912932	0.954	0.238	9.05716e-72	1.60219e-31	0.289447	0.654	0.235	3.12282e-27	7.60772e-87	0.727899	0.922	0.206	1.48282e-82	1.60219e-31	3.04309e-86
Nnat	6.23798e-31	0.513036	0.787	0.322	1.21584e-26	5.78408e-54	0.413462	0.69	0.125	1.12738e-49	1.71308e-41	0.610974	0.809	0.304	3.33896e-37	6.81801e-86	0.387251	0.699	0.099	1.3289e-81	6.23798e-31	2.72721e-85
Tspan8	1.40999e-65	0.944515	0.984	0.373	2.74822e-61	1.75114e-79	1.65358	1	0.302	3.41316e-75	2.24111e-71	0.915299	0.971	0.356	4.36814e-67	1.90316e-85	1.54089	0.981	0.308	3.70945e-81	1.40999e-65	7.61264e-85
Rhov	1.23521e-60	0.685091	1	0.682	2.40754e-56	3.26905e-55	0.906863	0.966	0.462	6.37171e-51	2.51487e-60	0.613759	1	0.612	4.90173e-56	1.81876e-74	0.809857	1	0.405	3.54495e-70	3.26905e-55	7.27505e-74
Cd82	2.00067e-55	0.615084	0.951	0.393	3.89951e-51	8.86996e-61	1.14328	0.989	0.408	1.72884e-56	1.58901e-53	0.485626	0.941	0.375	3.09713e-49	6.22169e-72	1.0059	0.99	0.37	1.21267e-67	1.58901e-53	2.48867e-71
Vamp8	2.46551e-45	0.322316	0.91	0.354	4.80552e-41	1.54339e-70	0.6754	0.966	0.238	3.00822e-66	1.22725e-50	0.298084	0.882	0.326	2.39203e-46	6.22663e-72	0.576789	0.903	0.236	1.21363e-67	2.46551e-45	2.49065e-71
Camk4	2.11856e-67	0.534891	0.967	0.389	4.12928e-63	5.72951e-49	0.537462	0.966	0.415	1.11674e-44	1.91074e-71	0.537661	0.934	0.349	3.72422e-67	3.27048e-43	0.428935	0.913	0.404	6.3745e-39	3.27048e-43	7.64295e-71
Mt3	1.59369e-61	-1.56103	0.754	0.97	3.10626e-57	1.25604e-54	-2.29891	0.736	0.993	2.44815e-50	1.98777e-71	-1.50282	0.728	0.977	3.87437e-67	3.4575e-62	-1.99469	0.777	0.996	6.739e-58	1.25604e-54	7.9511e-71
Jak1	1.85554e-66	1.40662	1	0.947	3.61663e-62	6.23468e-57	2.25625	1	0.916	1.2152e-52	8.70369e-70	1.26441	1	0.935	1.69644e-65	5.69236e-66	2.01324	1	0.9	1.1095e-61	6.23468e-57	3.48147e-69
Socs2	8.85241e-51	0.783801	1	0.801	1.72542e-46	1.71524e-57	1.37271	1	0.644	3.34317e-53	5.52557e-56	0.772639	0.993	0.777	1.07699e-51	2.52807e-67	1.23502	1	0.605	4.92746e-63	8.85241e-51	1.01123e-66
Ddah1	2.13381e-62	1.05519	1	0.83	4.15901e-58	9.43319e-56	1.24027	1	0.679	1.83862e-51	1.67781e-66	1.00195	1	0.811	3.27023e-62	3.28472e-63	1.07876	1	0.665	6.40225e-59	9.43319e-56	6.71126e-66
Lgi1	1.80024e-65	0.53633	0.984	0.4	3.50884e-61	3.13972e-51	0.647177	0.977	0.39	6.11963e-47	7.05266e-63	0.439733	0.949	0.371	1.37463e-58	2.32059e-58	0.582511	0.961	0.362	4.52307e-54	3.13972e-51	7.20095e-65
Nsg1	6.49899e-54	0.865428	1	0.741	1.26672e-49	2.28474e-51	1.01824	0.977	0.437	4.45318e-47	4.07895e-65	0.931827	1	0.746	7.95028e-61	5.258e-64	1.03852	1	0.453	1.02484e-59	2.28474e-51	1.63158e-64
Ptpro	1.35088e-50	0.312992	0.926	0.394	2.63299e-46	2.48697e-39	0.361124	0.736	0.203	4.84736e-35	1.08428e-62	0.339826	0.912	0.328	2.11337e-58	4.28049e-63	0.329624	0.757	0.17	8.34311e-59	2.48697e-39	1.7122e-62
Carhsp1	3.8165e-42	0.602482	1	0.852	7.43874e-38	3.5778e-52	1.1475	1	0.721	6.97349e-48	1.53645e-39	0.53529	1	0.841	2.9947e-35	1.41494e-62	1.07248	1	0.717	2.75786e-58	1.53645e-39	5.65976e-62
Resp18	5.70548e-55	0.910281	0.992	0.461	1.11205e-50	7.94464e-54	1.50019	1	0.497	1.54849e-49	3.21333e-62	0.918946	0.993	0.475	6.26311e-58	2.11598e-55	1.25106	1	0.513	4.12425e-51	7.94464e-54	1.28533e-61
Blvrb	4.00222e-53	0.812955	1	0.879	7.80074e-49	2.46587e-56	1.48816	1	0.832	4.80624e-52	5.42154e-58	0.820476	1	0.859	1.05671e-53	5.86836e-62	1.35364	1	0.83	1.1438e-57	4.00222e-53	2.34734e-61
Gusb	1.01882e-44	0.345307	0.975	0.625	1.98577e-40	1.27948e-32	0.386883	0.885	0.455	2.49383e-28	2.33756e-43	0.295806	0.949	0.535	4.55613e-39	5.23731e-60	0.474439	0.981	0.389	1.0208e-55	1.27948e-32	2.09492e-59
Ptprf	6.03338e-57	-0.69462	0.541	0.94	1.17597e-52	1.27846e-44	-0.910935	0.31	0.929	2.49185e-40	3.17278e-59	-0.713352	0.581	0.931	6.18407e-55	3.04582e-47	-0.766048	0.456	0.933	5.9366e-43	1.27846e-44	1.26911e-58
Klf5	2.13412e-23	0.431903	0.869	0.46	4.15961e-19	2.34779e-58	0.875383	0.977	0.376	4.57608e-54	6.27116e-19	0.270373	0.809	0.403	1.22231e-14	9.71205e-55	0.675022	0.942	0.352	1.89298e-50	6.27116e-19	9.39116e-58
Mras	2.90409e-41	0.463411	1	0.88	5.66035e-37	8.51783e-53	0.881728	1	0.816	1.66021e-48	2.66405e-30	0.37213	0.985	0.835	5.1925e-26	6.42337e-58	0.741971	1	0.763	1.25198e-53	2.66405e-30	2.56935e-57
Unc13c	1.9498e-39	0.354627	0.943	0.462	3.80035e-35	1.19094e-49	0.490002	0.966	0.333	2.32125e-45	1.91594e-44	0.328943	0.904	0.389	3.73435e-40	1.70641e-57	0.440295	0.942	0.311	3.32596e-53	1.9498e-39	6.82564e-57
Adk	1.32265e-32	1.08444	1	0.836	2.57799e-28	2.32847e-54	2.12071	1	0.832	4.53842e-50	6.56568e-32	1.01665	0.971	0.795	1.27972e-27	3.17557e-56	1.91329	1	0.804	6.1895e-52	6.56568e-32	1.27023e-55
Arl6ip5	1.26152e-37	0.402132	1	0.956	2.45883e-33	3.74063e-50	0.83398	1	0.941	7.29087e-46	5.77955e-43	0.404866	1	0.946	1.12649e-38	3.71382e-55	0.744973	1	0.94	7.23861e-51	1.26152e-37	1.48553e-54
Tmem45b	1.56636e-38	0.518294	1	0.44	3.05299e-34	5.52955e-49	0.9062	1	0.359	1.07776e-44	3.16229e-40	0.470912	0.993	0.423	6.16361e-36	3.84847e-55	0.846944	1	0.368	7.50106e-51	1.56636e-38	1.53939e-54
Tmem233	5.63535e-38	0.981497	0.918	0.398	1.09839e-33	2.22265e-53	1.51084	1	0.514	4.33216e-49	3.15148e-36	0.708408	0.897	0.386	6.14254e-32	1.57978e-54	1.34837	1	0.484	3.07915e-50	3.15148e-36	6.31912e-54
Pdlim7	2.32757e-52	-0.79394	0.861	0.957	4.53668e-48	1.60193e-46	-1.16177	0.299	0.928	3.12232e-42	1.35286e-52	-0.709538	0.897	0.962	2.63687e-48	3.10737e-54	-1.05769	0.524	0.957	6.05657e-50	1.60193e-46	1.24295e-53
Etv1	2.48679e-07	0.384526	0.434	0.229	0.00484699	1.14775e-53	1.06876	0.989	0.37	2.23709e-49	3.63944e-07	0.264501	0.404	0.207	0.00709363	1.65668e-44	0.964246	0.874	0.346	3.22904e-40	3.63944e-07	4.59102e-53
Hpcal1	6.43796e-30	0.827312	0.992	0.788	1.25482e-25	2.00799e-53	1.6127	1	0.866	3.91377e-49	8.80841e-28	0.733921	1	0.781	1.71685e-23	3.54085e-49	1.30154	0.99	0.893	6.90148e-45	8.80841e-28	8.03195e-53
Cd47	1.47919e-26	0.565634	1	0.968	2.8831e-22	1.30286e-52	1.12199	1	0.963	2.5394e-48	3.30802e-15	0.419139	1	0.961	6.44765e-11	9.16062e-50	0.930298	1	0.972	1.7855e-45	3.30802e-15	5.21143e-52

## Sheet: NP2
	NP2.MaleCCI_p_val	NP2.MaleCCI_avg_logFC	NP2.MaleCCI_pct.1	NP2.MaleCCI_pct.2	NP2.MaleCCI_p_val_adj	NP2.MaleSham_p_val	NP2.MaleSham_avg_logFC	NP2.MaleSham_pct.1	NP2.MaleSham_pct.2	NP2.MaleSham_p_val_adj	NP2.FemaleCCI_p_val	NP2.FemaleCCI_avg_logFC	NP2.FemaleCCI_pct.1	NP2.FemaleCCI_pct.2	NP2.FemaleCCI_p_val_adj	NP2.FemaleSham_p_val	NP2.FemaleSham_avg_logFC	NP2.FemaleSham_pct.1	NP2.FemaleSham_pct.2	NP2.FemaleSham_p_val_adj	NP2.max_pval	NP2.minimump_p_val
Mrgprd	0	1.5553	0.993	0.02	0	0	1.59553	0.996	0.059	0	0	1.35435	0.948	0.013	0	0	1.31223	0.951	0.041	0	0	0
Serpina11	0	0.910751	0.912	0.035	0	0	0.754909	0.879	0.07	0	0	0.900747	0.843	0.036	0	0	0.684437	0.763	0.066	0	0	0
A3galt2	0	0.40034	0.885	0.034	0	0	0.448731	0.901	0.088	0	0	0.4261	0.843	0.025	0	0	0.341088	0.742	0.061	0	0	0
Otoa	0	0.272108	0.676	0.011	0	0	0.354644	0.744	0.009	0	0	0.402216	0.744	0.014	0	0	0.318083	0.622	0.017	0	0	0
Gm765	1.6235e-269	1.18336	0.939	0.063	3.16437e-265	0	1.51472	0.975	0.109	0	0	1.29325	0.919	0.059	0	0	1.33666	0.938	0.109	0	1.6235e-269	0
Kcnk18	2.54266e-226	0.451157	0.885	0.067	4.9559e-222	2.86165e-251	0.323736	0.805	0.118	5.57763e-247	4.28186e-268	0.374006	0.785	0.047	8.34578e-264	0	0.289152	0.725	0.108	0	2.54266e-226	0
Moxd1	4.0139e-208	0.352648	0.892	0.077	7.8235e-204	2.20973e-276	0.302858	0.863	0.117	4.30698e-272	2.86377e-245	0.360524	0.82	0.061	5.58178e-241	0	0.294194	0.744	0.098	0	4.0139e-208	0
Prkcq	1.20677e-160	0.705726	0.892	0.128	2.35211e-156	0	0.884014	0.948	0.063	0	2.09576e-201	0.760554	0.872	0.111	4.08484e-197	0	0.746394	0.846	0.058	0	1.20677e-160	0
Kcnip2	8.07815e-146	0.709725	0.946	0.16	1.57451e-141	2.34618e-254	0.753109	0.966	0.249	4.57293e-250	2.69792e-165	0.69593	0.93	0.157	5.25852e-161	0	0.673124	0.911	0.228	0	8.07815e-146	0
Trpc3	1.13209e-138	0.649865	0.973	0.209	2.20656e-134	1.17846e-303	0.725467	0.96	0.224	2.29693e-299	1.75733e-157	0.567737	0.872	0.155	3.42521e-153	0	0.654145	0.9	0.2	0	1.13209e-138	0
Nog	1.48289e-138	0.36686	0.845	0.122	2.8903e-134	1.17184e-263	0.350173	0.821	0.128	2.28404e-259	1.96594e-141	0.341038	0.744	0.103	3.83182e-137	0	0.301013	0.693	0.097	0	1.48289e-138	0
Ctxn3	6.36423e-138	1.80147	1	0.267	1.24045e-133	4.74555e-305	1.84664	0.991	0.307	9.24956e-301	6.51428e-155	1.82864	0.988	0.274	1.2697e-150	0	1.74872	0.986	0.289	0	6.36423e-138	0
Ly86	8.61507e-137	2.16446	0.953	0.194	1.67916e-132	3.81302e-250	2.07352	0.953	0.32	7.43196e-246	2.09246e-159	2.27287	0.965	0.218	4.07841e-155	0	1.79441	0.887	0.273	0	8.61507e-137	0
Grik1	8.61809e-124	1.78264	0.993	0.319	1.67975e-119	2.75116e-301	1.67504	0.998	0.326	5.36228e-297	1.48268e-146	1.68454	0.994	0.306	2.88989e-142	0	1.49857	0.983	0.327	0	8.61809e-124	0
Tmem79	2.08957e-117	0.983528	0.993	0.333	4.07278e-113	4.58803e-263	0.967984	0.973	0.341	8.94254e-259	2.32875e-129	0.894964	0.924	0.269	4.53896e-125	0	0.859473	0.96	0.32	0	2.08957e-117	0
Cav1	3.25671e-113	0.520241	0.919	0.2	6.34765e-109	0	0.460022	0.913	0.114	0	3.67588e-139	0.52925	0.843	0.153	7.16466e-135	0	0.408236	0.792	0.112	0	3.25671e-113	0
Tmem233	6.86997e-108	2.08732	1	0.388	1.33903e-103	4.78802e-230	1.56537	0.998	0.455	9.33232e-226	4.06133e-132	2.12853	1	0.376	7.91593e-128	0	1.53737	0.998	0.43	0	6.86997e-108	0
Lpar3	1.53926e-99	0.486279	0.554	0.062	3.00018e-95	6.29371e-274	0.753933	0.735	0.083	1.22671e-269	1.18012e-138	0.551624	0.541	0.047	2.30017e-134	0	0.657279	0.631	0.07	0	1.53926e-99	0
Cd55	1.64947e-93	1.66645	1	0.636	3.21498e-89	1.23032e-238	1.55181	1	0.714	2.39802e-234	1.09746e-110	1.67169	0.994	0.589	2.13905e-106	0	1.46782	0.992	0.682	0	1.64947e-93	0
Synpr	1.51707e-89	1.28672	0.993	0.522	2.95693e-85	5.80913e-230	1.15921	0.993	0.497	1.13226e-225	6.9276e-106	1.32891	0.988	0.472	1.35026e-101	0	1.11686	0.995	0.474	0	1.51707e-89	0
Prkca	2.27651e-87	1.1793	0.993	0.669	4.43715e-83	5.1125e-215	1.11958	0.998	0.558	9.96477e-211	5.20173e-99	1.19714	0.983	0.62	1.01387e-94	0	1.07126	0.992	0.571	0	2.27651e-87	0
Rspo2	7.2508e-84	0.464157	0.912	0.297	1.41325e-79	1.05238e-266	0.508013	0.917	0.215	2.05119e-262	2.36709e-103	0.453288	0.872	0.245	4.61369e-99	0	0.460142	0.852	0.178	0	7.2508e-84	0
Tmem45b	2.64436e-80	0.887135	0.986	0.435	5.15413e-76	7.56362e-255	1.08594	0.991	0.283	1.47422e-250	3.80732e-95	0.914808	0.983	0.417	7.42084e-91	0	0.972438	0.967	0.306	0	2.64436e-80	0
Gna14	3.95191e-79	0.713876	0.973	0.495	7.70267e-75	6.62306e-239	0.784208	0.98	0.294	1.2909e-234	8.57571e-87	0.706065	0.948	0.467	1.67149e-82	0	0.779974	0.981	0.314	0	3.95191e-79	0
Adgrf5	2.05306e-45	0.293306	0.709	0.222	4.00161e-41	1.34382e-266	0.343647	0.614	0.044	2.61923e-262	1.03482e-47	0.27937	0.622	0.18	2.01696e-43	0	0.326854	0.606	0.059	0	2.05306e-45	0
Nt5e	4.47577e-54	0.431155	0.953	0.465	8.72373e-50	5.65071e-220	0.516806	0.944	0.281	1.10138e-215	1.58805e-52	0.382334	0.884	0.405	3.09527e-48	2.74065e-305	0.488219	0.908	0.254	5.34181e-301	1.58805e-52	1.09626e-304
Ccdc68	8.82969e-92	0.685237	0.932	0.292	1.721e-87	1.63177e-230	0.658971	0.928	0.199	3.18047e-226	4.9582e-106	0.652575	0.924	0.264	9.66403e-102	2.55116e-304	0.576769	0.895	0.206	4.97247e-300	8.82969e-92	1.02047e-303
Slc9a3r2	3.89544e-79	0.871961	0.946	0.584	7.5926e-75	2.87877e-213	0.904857	0.975	0.626	5.61101e-209	4.06375e-100	0.929921	0.948	0.483	7.92065e-96	4.15295e-304	0.845511	0.978	0.573	8.09452e-300	3.89544e-79	1.66118e-303
Higd1a	5.77426e-86	1.01402	1	0.965	1.12546e-81	4.88449e-212	1.08674	0.993	0.954	9.52035e-208	2.21653e-86	0.967182	0.988	0.96	4.32024e-82	5.14276e-304	1.01057	0.998	0.972	1.00237e-299	5.77426e-86	2.0571e-303
Gng2	6.14193e-45	0.510024	1	0.955	1.19712e-40	2.46854e-224	0.993094	0.996	0.925	4.81142e-220	5.21646e-63	0.615735	1	0.945	1.01674e-58	2.16176e-300	0.902441	0.997	0.939	4.2135e-296	6.14193e-45	8.64706e-300
Patj	2.18328e-141	0.500542	0.932	0.169	4.25543e-137	4.32577e-216	0.527303	0.935	0.282	8.43135e-212	3.00434e-139	0.447097	0.849	0.153	5.85576e-135	1.54897e-296	0.473064	0.871	0.239	3.01909e-292	3.00434e-139	6.19587e-296
Txn1	1.43253e-76	1.19133	1	0.983	2.79215e-72	8.11376e-220	1.58656	1	0.983	1.58145e-215	4.06661e-95	1.35371	1	0.989	7.92623e-91	6.5258e-294	1.45579	0.998	0.989	1.27194e-289	1.43253e-76	2.61032e-293
Dgkz	1.34882e-88	1.28	1	0.885	2.62899e-84	4.84629e-214	1.02554	1	0.873	9.4459e-210	1.06996e-87	1.13391	0.971	0.854	2.08545e-83	1.36083e-286	0.923894	0.997	0.88	2.6524e-282	1.06996e-87	5.44334e-286
Serping1	7.12432e-61	0.6163	0.905	0.458	1.3886e-56	1.45078e-229	0.773244	0.926	0.287	2.82772e-225	1.61352e-71	0.596278	0.89	0.396	3.14491e-67	1.79061e-284	0.690094	0.876	0.278	3.49008e-280	7.12432e-61	7.16244e-284
Rab27b	9.76913e-100	1.08846	0.986	0.454	1.9041e-95	1.63661e-211	0.879778	0.971	0.586	3.18991e-207	1.22475e-113	1.13466	0.965	0.417	2.38716e-109	1.08079e-281	0.796628	0.962	0.573	2.10657e-277	9.76913e-100	4.32317e-281
Gfra2	2.50892e-129	1.13471	0.993	0.225	4.89013e-125	6.61737e-201	0.962431	0.989	0.337	1.28979e-196	8.35868e-142	1.06778	0.965	0.213	1.62919e-137	1.73822e-278	0.894707	0.975	0.322	3.38796e-274	2.50892e-129	6.95288e-278
Arhgdig	4.14846e-74	-1.43698	0.547	0.947	8.08576e-70	7.02897e-190	-1.59188	0.516	0.921	1.37002e-185	1.49157e-86	-1.36149	0.616	0.962	2.90721e-82	2.73424e-277	-1.3733	0.529	0.959	5.32931e-273	4.14846e-74	1.0937e-276
Kcnip4	1.60815e-81	0.979897	1	0.726	3.13444e-77	2.04611e-227	1.0941	0.991	0.602	3.98807e-223	5.32135e-89	0.998542	0.983	0.698	1.03718e-84	7.91074e-276	0.977084	0.968	0.569	1.54188e-271	1.60815e-81	3.16429e-275
Selenom	1.98314e-67	-1.32586	0.628	0.958	3.86534e-63	2.97922e-203	-1.66349	0.554	0.955	5.8068e-199	9.4435e-76	-1.26928	0.645	0.96	1.84063e-71	1.80978e-273	-1.38616	0.614	0.973	3.52744e-269	1.98314e-67	7.23912e-273
Adk	1.49714e-84	1.2664	1	0.834	2.91808e-80	4.96043e-191	0.879988	0.998	0.811	9.66838e-187	1.21395e-101	1.34598	1	0.792	2.36611e-97	2.64277e-272	0.993478	0.987	0.785	5.15102e-268	1.49714e-84	1.05711e-271
Ppp1r1a	2.52075e-72	1.06095	0.98	0.598	4.9132e-68	2.48323e-225	1.17114	0.982	0.406	4.84006e-221	4.7958e-83	1.00883	0.971	0.568	9.3475e-79	3.44078e-272	1.06478	0.941	0.392	6.70642e-268	2.52075e-72	1.37631e-271
Acpp	1.72572e-89	1.26764	1	0.515	3.3636e-85	1.09148e-179	1.00786	0.991	0.537	2.12741e-175	1.44381e-109	1.26729	0.988	0.401	2.81412e-105	4.60712e-270	0.988561	0.987	0.515	8.97974e-266	1.72572e-89	1.84285e-269
Scg3	2.87638e-88	1.48449	1	0.965	5.60636e-84	1.48871e-211	1.21696	0.998	0.955	2.90164e-207	8.26398e-103	1.5516	1	0.952	1.61073e-98	4.83236e-270	1.09423	0.994	0.937	9.41876e-266	2.87638e-88	1.93294e-269
Eno2	1.96838e-66	-0.829743	0.372	0.918	3.83656e-62	5.98196e-195	-0.987031	0.377	0.923	1.16594e-190	8.27545e-73	-0.788204	0.424	0.923	1.61297e-68	5.13707e-269	-0.876928	0.39	0.941	1.00127e-264	1.96838e-66	2.05483e-268
Fbxo2	2.73837e-52	-1.30075	0.216	0.803	5.33736e-48	4.08278e-202	-1.57868	0.269	0.917	7.95774e-198	4.89334e-61	-1.25659	0.262	0.817	9.5376e-57	1.40591e-266	-1.41121	0.321	0.922	2.74025e-262	2.73837e-52	5.62363e-266
Sncg	2.83206e-84	0.920035	1	0.996	5.51996e-80	2.97869e-171	0.746017	1	1	5.80576e-167	1.95346e-98	0.954846	1	0.999	3.80749e-94	5.41142e-266	0.651784	1	1	1.05474e-261	2.83206e-84	2.16457e-265
Cdh1	4.00876e-115	0.511634	0.973	0.218	7.81347e-111	1.83312e-181	0.524803	0.955	0.318	3.57293e-177	6.59405e-134	0.600525	0.942	0.204	1.28525e-129	1.05496e-264	0.53998	0.941	0.317	2.05623e-260	4.00876e-115	4.21986e-264
Skp1a	4.91408e-85	1.54565	1	0.966	9.57803e-81	1.38042e-188	1.18311	1	0.975	2.69058e-184	1.31053e-94	1.53671	0.994	0.963	2.55435e-90	6.88551e-262	1.14544	0.998	0.976	1.34205e-257	4.91408e-85	2.7542e-261
Klf5	2.52253e-65	0.482224	0.959	0.451	4.91665e-61	5.71046e-179	0.442162	0.93	0.31	1.11303e-174	3.97389e-57	0.420335	0.866	0.396	7.74551e-53	9.41541e-262	0.44894	0.921	0.293	1.83516e-257	3.97389e-57	3.76616e-261
Cadm1	2.713e-77	0.925195	0.993	0.969	5.2879e-73	1.56254e-201	0.810588	1	0.956	3.04554e-197	8.16372e-87	0.906907	0.983	0.944	1.59119e-82	1.64964e-261	0.738058	0.998	0.953	3.21531e-257	2.713e-77	6.59855e-261

## Sheet: NP3
	NP3.MaleCCI_p_val	NP3.MaleCCI_avg_logFC	NP3.MaleCCI_pct.1	NP3.MaleCCI_pct.2	NP3.MaleCCI_p_val_adj	NP3.MaleSham_p_val	NP3.MaleSham_avg_logFC	NP3.MaleSham_pct.1	NP3.MaleSham_pct.2	NP3.MaleSham_p_val_adj	NP3.FemaleCCI_p_val	NP3.FemaleCCI_avg_logFC	NP3.FemaleCCI_pct.1	NP3.FemaleCCI_pct.2	NP3.FemaleCCI_p_val_adj	NP3.FemaleSham_p_val	NP3.FemaleSham_avg_logFC	NP3.FemaleSham_pct.1	NP3.FemaleSham_pct.2	NP3.FemaleSham_p_val_adj	NP3.max_pval	NP3.minimump_p_val
Mrgpra3	0	1.02532	0.859	0.007	0	0	1.21038	0.894	0.016	0	0	1.0756	0.81	0.007	0	0	1.13753	0.808	0.012	0	0	0
Cfap61	3.82646e-141	0.788454	0.875	0.06	7.45815e-137	1.26916e-246	0.840184	0.905	0.1	2.47372e-242	3.00576e-128	0.609943	0.776	0.048	5.85853e-124	0	0.66861	0.863	0.062	0	3.00576e-128	0
Gda	8.10188e-82	0.627585	0.953	0.141	1.57914e-77	6.11026e-284	0.773112	0.979	0.087	1.19095e-279	1.65376e-78	0.655278	0.862	0.11	3.22335e-74	0	0.698068	0.902	0.084	0	1.65376e-78	0
Gm567	5.12628e-133	0.368142	0.734	0.04	9.99162e-129	1.24039e-227	0.647874	0.831	0.081	2.41764e-223	2.54931e-131	0.418861	0.707	0.037	4.96885e-127	2.42162e-257	0.537857	0.698	0.07	4.71997e-253	2.54931e-131	9.68647e-257
Cav1	4.23049e-59	0.648332	0.953	0.221	8.24565e-55	3.90651e-177	0.679317	0.963	0.175	7.61417e-173	2.64773e-42	0.524251	0.81	0.175	5.16069e-38	1.73558e-241	0.600114	0.922	0.153	3.38281e-237	2.64773e-42	6.94231e-241
Gfra1	6.58809e-35	0.670658	1	0.522	1.28409e-30	3.24781e-138	0.823193	0.952	0.29	6.33031e-134	1.1785e-26	0.667351	0.931	0.467	2.29701e-22	1.06792e-199	0.817461	0.965	0.266	2.08148e-195	1.1785e-26	4.27167e-199
Krt27	2.76429e-75	0.890571	0.984	0.189	5.38788e-71	1.44895e-150	0.901578	0.958	0.246	2.82414e-146	2.57398e-69	0.95649	0.948	0.173	5.01695e-65	1.06791e-198	0.856122	0.949	0.235	2.08145e-194	2.57398e-69	4.27162e-198
Etv1	6.09889e-68	1.3175	1	0.22	1.18874e-63	9.22165e-131	1.22018	1	0.349	1.79739e-126	1.08048e-60	1.2998	0.966	0.202	2.10596e-56	3.69122e-188	1.2034	1	0.326	7.19455e-184	1.08048e-60	1.47649e-187
Kntc1	2.8818e-74	0.311867	0.844	0.119	5.61691e-70	2.2638e-137	0.391862	0.862	0.176	4.41237e-133	2.86654e-73	0.355729	0.828	0.103	5.58717e-69	2.45313e-187	0.348519	0.816	0.149	4.7814e-183	2.86654e-73	9.81252e-187
Mindy4b-ps	5.8099e-73	0.454519	0.875	0.127	1.13241e-68	7.38959e-131	0.504331	0.899	0.204	1.4403e-126	1.94212e-63	0.392182	0.81	0.11	3.78538e-59	5.106e-181	0.459809	0.859	0.179	9.9521e-177	1.94212e-63	2.0424e-180
Kcnk18	9.29311e-112	0.430315	0.953	0.09	1.81132e-107	6.44861e-112	0.345169	0.831	0.171	1.2569e-107	9.02332e-97	0.377937	0.81	0.07	1.75874e-92	3.58627e-176	0.354764	0.808	0.147	6.99e-172	9.02332e-97	1.43451e-175
Tspan8	9.70014e-48	1.15059	1	0.385	1.89065e-43	4.59352e-128	1.00058	0.984	0.281	8.95322e-124	7.23015e-42	1.20183	0.983	0.369	1.40923e-37	1.51736e-173	1.02541	0.976	0.289	2.95749e-169	7.23015e-42	6.06946e-173
Moxd1	9.68264e-96	0.460474	0.906	0.101	1.88724e-91	7.85537e-131	0.416254	0.878	0.176	1.53109e-126	2.58182e-76	0.408672	0.776	0.086	5.03222e-72	3.05764e-170	0.424002	0.776	0.141	5.95964e-166	2.58182e-76	1.22306e-169
A3galt2	6.17563e-101	0.288446	0.781	0.061	1.20369e-96	3.34732e-111	0.278977	0.847	0.157	6.52427e-107	6.62404e-77	0.262829	0.655	0.054	1.29109e-72	8.26269e-162	0.270777	0.71	0.11	1.61048e-157	6.62404e-77	3.30507e-161
Cd82	1.46035e-44	0.746138	1	0.403	2.84636e-40	3.81444e-105	0.80004	0.968	0.39	7.43472e-101	1.77834e-33	0.748081	0.931	0.387	3.46616e-29	9.28569e-156	0.749927	0.984	0.353	1.80987e-151	1.77834e-33	3.71428e-155
Smyd3	2.08255e-45	1.15119	1	0.503	4.0591e-41	7.19365e-115	1.22301	0.984	0.549	1.40211e-110	1.50212e-41	1.12537	0.983	0.457	2.92779e-37	8.99349e-151	1.05006	0.969	0.466	1.75292e-146	1.50212e-41	3.5974e-150
Dnase1l3	3.54839e-24	0.284621	0.844	0.273	6.91617e-20	1.18058e-124	0.349053	0.804	0.144	2.30106e-120	1.91708e-21	0.324385	0.793	0.258	3.73658e-17	2.54061e-144	0.321001	0.796	0.16	4.9519e-140	1.91708e-21	1.01624e-143
Osmr	5.55748e-38	0.58445	0.969	0.323	1.08321e-33	4.4516e-117	0.734502	0.968	0.254	8.67661e-113	2.91774e-25	0.517943	0.862	0.314	5.68697e-21	2.1802e-137	0.608216	0.929	0.271	4.24942e-133	2.91774e-25	8.72078e-137
Ctxn3	6.9223e-52	1.1783	1	0.289	1.34923e-47	1.22551e-84	0.931086	0.984	0.362	2.38864e-80	2.2982e-38	1.06533	0.931	0.298	4.47942e-34	7.63711e-131	0.945172	0.976	0.337	1.48855e-126	2.2982e-38	3.05485e-130
Cacng2	8.14512e-41	0.308279	0.906	0.246	1.58757e-36	4.62126e-111	0.301332	0.847	0.2	9.0073e-107	6.52476e-37	0.323478	0.793	0.184	1.27174e-32	3.51821e-129	0.27465	0.718	0.152	6.85734e-125	6.52476e-37	1.40728e-128
Tnr	6.46722e-61	0.376368	0.938	0.192	1.26053e-56	1.3033e-92	0.348854	0.873	0.259	2.54026e-88	5.64541e-44	0.420873	0.828	0.173	1.10035e-39	1.5248e-126	0.316461	0.792	0.192	2.972e-122	5.64541e-44	6.09922e-126
Aprt	1.43392e-28	0.686676	1	0.786	2.79486e-24	3.47885e-92	0.93338	0.979	0.625	6.78062e-88	5.66227e-27	0.789906	1	0.748	1.10363e-22	1.76016e-126	0.923936	0.988	0.592	3.43072e-122	5.66227e-27	7.04063e-126
Cav2	7.56083e-32	0.417592	0.969	0.543	1.47368e-27	8.56046e-94	0.516721	0.942	0.389	1.66852e-89	2.40466e-14	0.284718	0.81	0.456	4.68692e-10	2.04096e-126	0.448175	0.941	0.344	3.97804e-122	2.40466e-14	8.16385e-126
Crip2	1.12981e-37	0.923598	1	0.976	2.20211e-33	2.29905e-91	0.835593	1	0.976	4.48108e-87	6.68358e-36	0.981612	1	0.981	1.3027e-31	2.15822e-124	0.792207	1	0.987	4.20658e-120	6.68358e-36	8.63286e-124
Lgi1	1.72591e-32	0.581136	0.953	0.413	3.36397e-28	2.73715e-99	0.656591	0.968	0.372	5.33498e-95	7.29494e-21	0.506191	0.897	0.384	1.42186e-16	2.28291e-124	0.651815	0.941	0.346	4.44962e-120	7.29494e-21	9.13164e-124
Calm2	2.17256e-36	0.752571	1	0.989	4.23455e-32	3.88477e-84	0.865677	1	0.987	7.57181e-80	4.50423e-34	0.79211	1	0.992	8.77919e-30	1.03576e-122	0.790566	1	0.994	2.0188e-118	4.50423e-34	4.14304e-122
Cpb1	1.83574e-55	0.293859	0.859	0.158	3.57804e-51	6.66334e-107	0.355357	0.868	0.238	1.29875e-102	2.80276e-57	0.361853	0.81	0.129	5.46287e-53	1.22091e-121	0.308471	0.824	0.224	2.37967e-117	1.83574e-55	4.88363e-121
Pop5	5.33274e-28	0.626981	1	0.952	1.0394e-23	3.88116e-79	0.85504	1	0.933	7.56476e-75	3.55671e-23	0.696586	0.966	0.959	6.93239e-19	4.34065e-117	0.874559	0.996	0.957	8.46036e-113	3.55671e-23	1.73626e-116
Tmem233	4.45093e-43	1.71896	1	0.406	8.67531e-39	2.00027e-77	1.14368	1	0.499	3.89872e-73	5.72874e-38	1.59291	0.983	0.396	1.11659e-33	1.80422e-114	1.14307	0.996	0.469	3.5166e-110	5.72874e-38	7.21687e-114
Kcnmb1	2.07768e-57	0.823899	1	0.237	4.04961e-53	6.31003e-91	0.815019	0.974	0.423	1.22989e-86	1.25158e-47	0.721203	0.948	0.225	2.43946e-43	8.97135e-114	0.717454	0.973	0.433	1.74861e-109	1.25158e-47	3.58854e-113
Skp1a	3.7788e-36	1.35364	1	0.967	7.36527e-32	6.45755e-85	1.09274	1	0.977	1.25864e-80	3.93699e-34	1.44419	1	0.964	7.67359e-30	2.02987e-113	1.0269	0.996	0.978	3.95642e-109	3.93699e-34	8.11948e-113
Deptor	1.33281e-37	0.804301	1	0.729	2.59779e-33	4.37191e-89	0.765157	0.984	0.696	8.5213e-85	3.72306e-29	0.797145	0.966	0.649	7.25661e-25	1.14379e-112	0.666959	0.984	0.616	2.22935e-108	3.72306e-29	4.57514e-112
Carhsp1	2.33925e-09	0.33763	1	0.855	4.55944e-05	2.72501e-89	0.862381	1	0.712	5.31132e-85	1.20316e-08	0.352299	1	0.845	0.000234508	1.70783e-112	0.81024	0.992	0.71	3.32873e-108	1.20316e-08	6.83132e-112
Efcab10	1.81634e-46	0.436164	0.906	0.252	3.54022e-42	2.71766e-89	0.456674	0.915	0.372	5.29699e-85	5.90425e-40	0.498235	0.862	0.244	1.1508e-35	8.14991e-111	0.470986	0.922	0.38	1.5885e-106	5.90425e-40	3.25996e-110
Tmem45b	2.02701e-28	0.705354	0.984	0.451	3.95084e-24	7.19447e-82	0.752131	0.995	0.339	1.40227e-77	4.28863e-21	0.667676	0.914	0.436	8.35897e-17	8.26041e-111	0.724847	0.996	0.35	1.61004e-106	4.28863e-21	3.30416e-110
Cd55	7.5828e-39	1.39216	1	0.647	1.47796e-34	2.73899e-76	1.01269	1	0.737	5.33857e-72	3.92209e-36	1.34668	1	0.602	7.64454e-32	1.08051e-109	0.984739	0.996	0.703	2.10603e-105	3.92209e-36	4.32205e-109
Gna14	1.65268e-30	0.565207	1	0.509	3.22124e-26	5.0548e-83	0.612673	0.984	0.349	9.85231e-79	6.96532e-26	0.547314	0.966	0.482	1.35761e-21	1.30149e-109	0.59411	0.969	0.361	2.53673e-105	6.96532e-26	5.20596e-109
Jak1	3.97974e-28	0.722461	1	0.948	7.75692e-24	1.5917e-81	0.637518	1	0.914	3.10239e-77	2.47073e-27	0.714078	0.983	0.936	4.8157e-23	3.06533e-109	0.734917	1	0.897	5.97464e-105	2.47073e-27	1.22613e-108
Zfp945	8.92419e-28	0.627012	1	0.72	1.73941e-23	8.72945e-80	0.672792	0.931	0.555	1.70146e-75	1.33365e-21	0.660384	0.948	0.663	2.59942e-17	1.03621e-108	0.681628	0.941	0.504	2.01967e-104	1.33365e-21	4.14482e-108
Rgs4	2.32375e-32	1.30351	1	0.867	4.52923e-28	1.21313e-85	1.17472	1	0.821	2.36451e-81	2.10761e-25	1.20513	1	0.85	4.10794e-21	6.33843e-107	1.14532	1	0.805	1.23542e-102	2.10761e-25	2.53537e-106
Camk2a	1.72445e-39	1.00021	1	0.715	3.36113e-35	3.88616e-88	0.807258	0.984	0.688	7.57452e-84	9.58259e-31	0.875112	0.983	0.693	1.86774e-26	6.94902e-106	0.678853	0.988	0.69	1.35443e-101	9.58259e-31	2.77961e-105
Med10	3.75194e-24	0.504668	1	0.898	7.31291e-20	1.18328e-75	0.727762	0.984	0.858	2.30633e-71	8.01218e-20	0.555127	0.966	0.896	1.56165e-15	1.93522e-105	0.674429	0.992	0.863	3.77193e-101	8.01218e-20	7.74087e-105
Itk	2.43183e-42	0.580703	0.797	0.172	4.73988e-38	1.31168e-57	0.367641	0.471	0.098	2.55659e-53	1.20881e-28	0.478732	0.638	0.146	2.35608e-24	1.38432e-102	0.384626	0.549	0.106	2.69817e-98	1.20881e-28	5.53726e-102
Ovol2	9.6682e-44	0.268296	0.688	0.121	1.88443e-39	2.47889e-101	0.337251	0.746	0.153	4.83161e-97	5.64707e-40	0.259491	0.707	0.123	1.10067e-35	5.11701e-97	0.305428	0.698	0.179	9.97356e-93	5.64707e-40	9.91557e-101
Selenom	7.4195e-22	-1.10268	0.922	0.941	1.44614e-17	1.03099e-69	-1.51248	0.735	0.912	2.00951e-65	8.09641e-18	-0.939979	0.759	0.948	1.57807e-13	3.50775e-100	-1.3221	0.812	0.939	6.83695e-96	8.09641e-18	1.4031e-99
Plxnc1	1.10471e-37	0.887791	1	0.671	2.15319e-33	1.67593e-71	0.693179	0.995	0.661	3.26655e-67	2.04023e-32	0.876517	1	0.651	3.9766e-28	7.70555e-100	0.672061	0.992	0.658	1.50189e-95	2.04023e-32	3.08222e-99
Pde1c	1.49672e-25	0.602601	1	0.661	2.91726e-21	1.40035e-81	0.619933	0.968	0.529	2.72943e-77	3.13026e-16	0.44852	0.966	0.632	6.10118e-12	1.28001e-96	0.57475	0.961	0.516	2.49486e-92	3.13026e-16	5.12003e-96
Acpp	5.11226e-40	1.25385	1	0.529	9.96431e-36	9.58658e-71	0.843152	1	0.573	1.86852e-66	7.00392e-34	1.00855	0.983	0.42	1.36513e-29	1.12902e-94	0.782983	0.992	0.547	2.20058e-90	7.00392e-34	4.51609e-94
Tomm5	8.74999e-35	0.698427	1	0.95	1.70546e-30	6.18628e-73	0.667704	0.995	0.943	1.20577e-68	2.12736e-31	0.808389	1	0.958	4.14644e-27	3.30143e-94	0.627178	0.996	0.953	6.43481e-90	2.12736e-31	1.32057e-93
Dusp26	1.53733e-31	0.757767	1	0.94	2.99642e-27	1.36857e-77	0.69366	1	0.933	2.66748e-73	1.24663e-25	0.72192	0.983	0.94	2.42981e-21	2.56748e-93	0.588867	0.996	0.957	5.00428e-89	1.24663e-25	1.02699e-92

## Sheet: PEP1
	PEP1.MaleCCI_p_val	PEP1.MaleCCI_avg_logFC	PEP1.MaleCCI_pct.1	PEP1.MaleCCI_pct.2	PEP1.MaleCCI_p_val_adj	PEP1.MaleSham_p_val	PEP1.MaleSham_avg_logFC	PEP1.MaleSham_pct.1	PEP1.MaleSham_pct.2	PEP1.MaleSham_p_val_adj	PEP1.FemaleCCI_p_val	PEP1.FemaleCCI_avg_logFC	PEP1.FemaleCCI_pct.1	PEP1.FemaleCCI_pct.2	PEP1.FemaleCCI_p_val_adj	PEP1.FemaleSham_p_val	PEP1.FemaleSham_avg_logFC	PEP1.FemaleSham_pct.1	PEP1.FemaleSham_pct.2	PEP1.FemaleSham_p_val_adj	PEP1.max_pval	PEP1.minimump_p_val
Traf3ip3	3.40883e-258	0.479753	0.893	0.074	6.64414e-254	1.56053e-269	0.279537	0.667	0.057	3.04163e-265	1.00914e-254	0.468674	0.747	0.078	1.96692e-250	0	0.310626	0.611	0.064	0	1.00914e-254	0
Kcnv1	4.20213e-192	0.589022	0.893	0.124	8.19038e-188	4.70042e-238	0.527706	0.863	0.188	9.16159e-234	7.62039e-236	0.6467	0.835	0.13	1.48529e-231	0	0.482976	0.789	0.192	0	4.20213e-192	0
Etv1	1.08471e-147	0.459199	0.964	0.185	2.11421e-143	8.17875e-143	0.298323	0.96	0.302	1.59412e-138	2.75319e-213	0.557572	0.886	0.155	5.36623e-209	0	0.425449	0.928	0.254	0	8.17875e-143	0
Epha5	3.39462e-97	0.712685	0.99	0.521	6.61646e-93	1.50423e-223	0.712153	0.986	0.371	2.93189e-219	6.93387e-127	0.73193	0.939	0.486	1.35148e-122	0	0.586441	0.942	0.363	0	3.39462e-97	0
Cdhr1	3.08833e-83	0.515036	0.964	0.444	6.01946e-79	2.21666e-249	0.69257	0.97	0.244	4.32049e-245	3.27849e-109	0.546529	0.919	0.433	6.39011e-105	0	0.660163	0.952	0.292	0	3.08833e-83	0
Pcp4l1	9.7274e-100	1.00334	0.939	0.303	1.89597e-95	9.39483e-144	0.943489	0.902	0.361	1.83115e-139	1.07588e-144	1.03165	0.919	0.306	2.09701e-140	2.02627e-294	0.930139	0.924	0.359	3.9494e-290	9.7274e-100	8.10507e-294
Calca	5.74124e-102	1.80106	1	0.913	1.11903e-97	4.76267e-171	1.23015	1	0.966	9.28291e-167	8.89046e-134	1.61491	1	0.962	1.73284e-129	3.12701e-281	1.03853	1	0.972	6.09486e-277	5.74124e-102	1.2508e-280
Lcorl	2.16215e-98	0.772443	0.99	0.573	4.21424e-94	2.03618e-167	0.779982	0.988	0.607	3.96872e-163	3.68609e-118	0.7541	0.939	0.547	7.18455e-114	3.86703e-279	0.663395	0.979	0.583	7.53723e-275	2.16215e-98	1.54681e-278
Capn5	1.7711e-88	0.718707	0.985	0.757	3.45205e-84	1.80166e-146	0.635926	0.988	0.74	3.51161e-142	1.9693e-123	0.784603	0.966	0.729	3.83837e-119	1.48105e-268	0.639705	0.989	0.731	2.88672e-264	1.7711e-88	5.92421e-268
Map7d2	9.17597e-94	1.00039	1	0.92	1.78849e-89	2.84567e-160	0.791213	1	0.892	5.54649e-156	3.98273e-136	0.964114	0.997	0.911	7.76273e-132	1.54775e-261	0.70825	0.995	0.891	3.01672e-257	9.17597e-94	6.191e-261
Mgst3	7.84377e-65	-1.05508	0.638	0.877	1.52883e-60	1.43235e-133	-1.27363	0.547	0.867	2.7918e-129	2.48591e-93	-1.01446	0.582	0.892	4.84529e-89	4.71614e-255	-1.16965	0.496	0.865	9.19222e-251	7.84377e-65	1.88645e-254
Ift122	9.41774e-96	1.01531	0.995	0.601	1.83561e-91	9.34971e-146	0.813743	0.991	0.716	1.82235e-141	1.3637e-117	0.913688	0.956	0.557	2.65798e-113	2.38274e-254	0.700677	0.98	0.725	4.64419e-250	9.41774e-96	9.53095e-254
Cd9	1.16139e-95	1.2472	1	0.98	2.26366e-91	1.41861e-136	0.948326	1	0.979	2.76502e-132	1.59069e-118	1.06137	1	0.989	3.10041e-114	2.63858e-241	0.819833	1	0.988	5.14286e-237	1.16139e-95	1.05543e-240
Resp18	9.07842e-69	0.638353	0.99	0.447	1.76947e-64	2.85739e-151	0.784248	0.986	0.44	5.56934e-147	2.60222e-58	0.418983	0.902	0.458	5.07199e-54	6.41727e-241	0.690567	0.956	0.445	1.25079e-236	2.60222e-58	2.56691e-240
Tac1	2.12282e-91	1.7806	0.985	0.73	4.13759e-87	1.54459e-158	1.2756	1	0.922	3.01056e-154	2.8146e-111	1.57536	0.98	0.819	5.48593e-107	8.72893e-240	0.999864	1	0.941	1.70136e-235	2.12282e-91	3.49157e-239
Il6st	1.78336e-37	0.410087	0.995	0.919	3.47596e-33	1.5728e-133	0.63953	0.998	0.851	3.06554e-129	1.34453e-58	0.509001	0.973	0.902	2.62062e-54	6.32185e-234	0.612326	0.981	0.797	1.23219e-229	1.78336e-37	2.52874e-233
Alkal2	1.06133e-96	0.507532	0.923	0.301	2.06864e-92	1.26295e-166	0.492476	0.84	0.256	2.46162e-162	6.10267e-130	0.620403	0.899	0.303	1.18947e-125	2.02145e-228	0.424622	0.795	0.269	3.94e-224	1.06133e-96	8.08579e-228
Pik3r1	2.78985e-61	0.673093	1	0.856	5.4377e-57	6.63704e-126	0.707298	0.998	0.878	1.29363e-121	1.69779e-92	0.709085	0.98	0.812	3.30916e-88	5.00323e-228	0.677084	0.994	0.842	9.7518e-224	2.78985e-61	2.00129e-227
Gnas	5.63555e-75	0.481838	1	0.999	1.09843e-70	2.15521e-100	0.424908	1	1	4.20072e-96	1.17639e-82	0.383506	1	0.999	2.29291e-78	2.17434e-206	0.393346	1	0.999	4.238e-202	5.63555e-75	8.69736e-206
Ntrk1	9.94369e-81	0.985226	1	0.78	1.93812e-76	1.89655e-115	0.855179	0.998	0.775	3.69656e-111	6.53899e-100	0.903905	0.983	0.769	1.27451e-95	2.41506e-202	0.73292	0.991	0.79	4.7072e-198	9.94369e-81	9.66026e-202
Itpkb	5.37027e-40	-0.374413	0.357	0.752	1.04672e-35	5.02877e-110	-0.568965	0.384	0.796	9.80158e-106	8.21105e-50	-0.376163	0.354	0.723	1.60042e-45	8.1839e-201	-0.530436	0.334	0.798	1.59512e-196	5.37027e-40	3.27356e-200
Syp	5.97098e-40	-0.542365	0.628	0.895	1.1638e-35	9.28603e-111	-0.750443	0.593	0.899	1.80994e-106	7.77742e-43	-0.422387	0.586	0.872	1.5159e-38	1.57802e-200	-0.66253	0.589	0.91	3.07572e-196	5.97098e-40	6.31208e-200
Asic3	6.21361e-77	0.389849	0.745	0.201	1.2111e-72	5.34709e-154	0.456829	0.735	0.184	1.0422e-149	9.07746e-93	0.353777	0.63	0.167	1.76929e-88	2.92635e-200	0.374366	0.643	0.184	5.70375e-196	6.21361e-77	1.17054e-199
Igfbp2	5.8438e-76	0.426227	0.821	0.26	1.13902e-71	6.18367e-139	0.482902	0.851	0.281	1.20526e-134	2.43223e-83	0.421069	0.724	0.25	4.74067e-79	3.12373e-200	0.472369	0.796	0.315	6.08846e-196	5.8438e-76	1.24949e-199
Fam189b	9.80517e-81	0.593303	1	0.948	1.91113e-76	1.58636e-99	0.42904	0.998	0.934	3.09197e-95	1.41889e-114	0.63254	0.993	0.957	2.76555e-110	6.6063e-196	0.425075	0.996	0.962	1.28763e-191	9.80517e-81	2.64252e-195
Gap43	0.950243	-0.301675	1	0.933	1	1.5304e-131	0.753778	0.998	0.798	2.98289e-127	0.888858	-0.320727	1	0.95	1	1.69853e-195	0.555701	1	0.835	3.3106e-191	0.950243	6.79411e-195
Osmr	1.58814e-65	0.380769	0.832	0.301	3.09544e-61	4.61551e-149	0.316847	0.83	0.216	8.99609e-145	2.98297e-77	0.376512	0.758	0.284	5.81412e-73	2.19254e-195	0.283866	0.739	0.223	4.27347e-191	1.58814e-65	8.77015e-195
Sh3bgrl3	8.10998e-54	0.395601	1	0.981	1.58072e-49	5.32255e-91	0.483956	1	0.982	1.03742e-86	7.33924e-64	0.358424	1	0.99	1.43049e-59	4.00944e-193	0.439423	1	0.989	7.8148e-189	8.10998e-54	1.60378e-192
Calml4	2.04081e-120	0.559459	0.918	0.23	3.97775e-116	4.05557e-162	0.482402	0.879	0.286	7.90472e-158	8.72554e-124	0.509538	0.791	0.225	1.7007e-119	2.02132e-192	0.441023	0.811	0.331	3.93976e-188	2.04081e-120	8.08529e-192
Ngfr	3.56219e-71	0.814676	0.98	0.688	6.94306e-67	1.3987e-127	0.78217	0.986	0.599	2.72621e-123	1.89941e-102	0.879591	0.97	0.7	3.70214e-98	9.2403e-190	0.700817	0.956	0.629	1.80103e-185	3.56219e-71	3.69612e-189
Trpv1	4.88647e-82	0.633184	0.985	0.523	9.52422e-78	1.56636e-122	0.477433	0.993	0.553	3.05299e-118	2.56894e-101	0.697633	0.949	0.549	5.00712e-97	2.2467e-187	0.463424	0.985	0.635	4.37904e-183	4.88647e-82	8.9868e-187
Tagln2	1.54779e-48	0.602489	1	0.87	3.0168e-44	2.96547e-109	0.789192	0.995	0.738	5.78e-105	8.9303e-47	0.48437	0.983	0.882	1.74061e-42	5.12974e-187	0.695502	0.994	0.761	9.99838e-183	8.9303e-47	2.0519e-186
Tmem100	1.04621e-116	0.986726	0.995	0.351	2.03916e-112	9.12419e-117	0.627516	0.974	0.481	1.7784e-112	5.68987e-145	0.917197	0.963	0.368	1.10901e-140	5.37154e-185	0.553696	0.98	0.532	1.04697e-180	1.04621e-116	2.14862e-184
Ptger1	1.57442e-93	0.362533	0.929	0.309	3.0687e-89	5.42674e-111	0.33415	0.919	0.413	1.05773e-106	6.25251e-103	0.33342	0.795	0.264	1.21868e-98	9.07932e-185	0.306759	0.849	0.37	1.76965e-180	1.57442e-93	3.63173e-184
Sap30l	1.22826e-46	0.35804	0.985	0.943	2.394e-42	7.09537e-119	0.474452	0.977	0.899	1.38296e-114	1.88386e-38	0.289632	0.953	0.948	3.67182e-34	1.07867e-183	0.416999	0.975	0.92	2.10243e-179	1.88386e-38	4.31466e-183
Nmb	6.53634e-90	0.905705	0.99	0.542	1.274e-85	1.11622e-95	0.547238	0.993	0.677	2.17563e-91	8.24253e-118	0.79773	0.973	0.546	1.60655e-113	3.07687e-181	0.521991	0.978	0.689	5.99712e-177	6.53634e-90	1.23075e-180
Rims2	3.79407e-73	0.69539	0.995	0.778	7.39503e-69	9.29593e-140	0.699685	0.988	0.781	1.81187e-135	7.08238e-80	0.675201	0.916	0.735	1.38043e-75	2.36731e-180	0.521431	0.967	0.747	4.61413e-176	3.79407e-73	9.46925e-180
Fth1	5.18208e-82	0.700378	1	1	1.01004e-77	6.83065e-92	0.391341	1	1	1.33136e-87	2.76241e-105	0.706078	1	1	5.38422e-101	6.03836e-165	0.341347	1	1	1.17694e-160	5.18208e-82	2.41534e-164
Rbfox3	1.83227e-76	0.705072	0.995	0.814	3.57127e-72	7.31627e-112	0.521262	0.988	0.841	1.42601e-107	3.87151e-92	0.706931	0.956	0.797	7.54596e-88	9.19284e-164	0.450809	0.982	0.856	1.79178e-159	1.83227e-76	3.67714e-163
Fstl1	7.6238e-79	0.947698	1	0.969	1.48595e-74	3.75209e-96	0.534664	1	0.971	7.31319e-92	1.98412e-116	1.01099	1	0.975	3.86724e-112	1.11749e-162	0.493345	1	0.982	2.1781e-158	7.6238e-79	4.46996e-162
Scn10a	9.99275e-94	0.869021	1	0.506	1.94769e-89	8.5298e-73	0.452295	0.988	0.743	1.66254e-68	1.13301e-134	0.965518	0.976	0.514	2.20835e-130	5.81929e-162	0.47142	0.991	0.768	1.13424e-157	8.5298e-73	2.32771e-161
Nedd4l	4.79459e-84	0.723132	1	0.815	9.34514e-80	3.11722e-106	0.514354	0.986	0.831	6.07578e-102	6.28738e-93	0.688058	0.946	0.788	1.22547e-88	1.60355e-161	0.435199	0.98	0.851	3.12548e-157	4.79459e-84	6.4142e-161
Rims3	3.55683e-67	0.534791	0.99	0.9	6.93262e-63	2.13152e-112	0.499345	0.998	0.887	4.15455e-108	5.77726e-88	0.573373	0.96	0.892	1.12605e-83	2.11871e-161	0.42019	0.989	0.927	4.12958e-157	3.55683e-67	8.47484e-161
Sdcbp	4.53639e-52	-0.395654	0.995	0.974	8.84187e-48	4.0897e-80	-0.488133	0.993	0.964	7.97123e-76	6.29333e-57	-0.356188	0.98	0.973	1.22663e-52	2.16431e-160	-0.472427	0.984	0.979	4.21846e-156	4.53639e-52	8.65724e-160
Rab15	1.7617e-68	-0.697694	0.25	0.815	3.43374e-64	7.007e-105	-0.600563	0.193	0.707	1.36573e-100	8.75099e-85	-0.609452	0.266	0.795	1.70566e-80	2.72928e-158	-0.524306	0.203	0.647	5.31964e-154	1.7617e-68	1.09171e-157
Ptgir	9.75665e-105	0.510627	0.954	0.284	1.90167e-100	1.3301e-121	0.43847	0.919	0.372	2.5925e-117	1.50508e-128	0.556161	0.902	0.294	2.93356e-124	2.0476e-157	0.341869	0.859	0.381	3.99098e-153	9.75665e-105	8.19041e-157
Aig1	1.55738e-31	-0.354455	0.898	0.917	3.03549e-27	4.32006e-87	-0.456712	0.902	0.919	8.42024e-83	4.38829e-36	-0.325268	0.771	0.895	8.55322e-32	6.2052e-155	-0.431064	0.806	0.915	1.20945e-150	1.55738e-31	2.48208e-154
Prkca	6.48152e-67	0.528571	0.995	0.663	1.26331e-62	5.88149e-76	0.357281	0.993	0.561	1.14636e-71	3.6082e-88	0.629575	0.929	0.612	7.03274e-84	1.69118e-153	0.394662	0.979	0.554	3.29627e-149	6.48152e-67	6.76471e-153
Nfib	5.96075e-43	0.301515	0.964	0.552	1.16181e-38	4.04123e-95	0.321152	0.902	0.401	7.87676e-91	4.98872e-47	0.298691	0.889	0.524	9.72351e-43	7.51447e-153	0.318039	0.86	0.389	1.46465e-148	5.96075e-43	3.00579e-152
Pcdh17	7.42903e-50	0.361635	0.944	0.545	1.44799e-45	1.95894e-113	0.353026	0.914	0.351	3.81817e-109	5.61534e-72	0.471764	0.889	0.5	1.09449e-67	2.51021e-152	0.330951	0.868	0.411	4.89265e-148	7.42903e-50	1.00408e-151

## Sheet: PEP2
	PEP2.MaleCCI_p_val	PEP2.MaleCCI_avg_logFC	PEP2.MaleCCI_pct.1	PEP2.MaleCCI_pct.2	PEP2.MaleCCI_p_val_adj	PEP2.MaleSham_p_val	PEP2.MaleSham_avg_logFC	PEP2.MaleSham_pct.1	PEP2.MaleSham_pct.2	PEP2.MaleSham_p_val_adj	PEP2.FemaleCCI_p_val	PEP2.FemaleCCI_avg_logFC	PEP2.FemaleCCI_pct.1	PEP2.FemaleCCI_pct.2	PEP2.FemaleCCI_p_val_adj	PEP2.FemaleSham_p_val	PEP2.FemaleSham_avg_logFC	PEP2.FemaleSham_pct.1	PEP2.FemaleSham_pct.2	PEP2.FemaleSham_p_val_adj	PEP2.max_pval	PEP2.minimump_p_val
Tmc3	1.19672e-305	0.845302	0.527	0.002	2.33253e-301	1.30205e-295	0.580532	0.455	0.003	2.53782e-291	8.83035e-279	0.680615	0.409	0.003	1.72112e-274	0	0.519832	0.468	0.007	0	8.83035e-279	0
Mymk	2.66905e-277	0.52938	0.54	0.006	5.20224e-273	8.93297e-277	0.52396	0.485	0.009	1.74113e-272	5.71807e-293	0.391837	0.439	0.004	1.11451e-288	0	0.5362	0.479	0.012	0	8.93297e-277	0
C1qtnf7	2.55907e-212	0.547347	0.853	0.069	4.98789e-208	7.06863e-220	0.616542	0.838	0.108	1.37775e-215	2.11576e-203	0.503793	0.778	0.081	4.12383e-199	0	0.55277	0.791	0.12	0	2.11576e-203	0
Col25a1	3.12707e-210	0.330898	0.593	0.023	6.09497e-206	1.9968e-241	0.447432	0.609	0.034	3.89196e-237	2.96723e-184	0.353934	0.465	0.023	5.78342e-180	0	0.386499	0.548	0.035	0	2.96723e-184	0
Creb5	7.92777e-53	0.668938	0.747	0.288	1.5452e-48	4.93323e-161	0.52576	0.664	0.085	9.61535e-157	1.63629e-49	0.545567	0.631	0.245	3.18929e-45	0	0.589321	0.632	0.07	0	1.63629e-49	0
Gm43154	3.36973e-151	0.521736	0.827	0.107	6.56793e-147	2.81184e-131	0.491543	0.706	0.135	5.48056e-127	8.8516e-174	0.521026	0.828	0.125	1.72526e-169	4.05202e-305	0.513832	0.73	0.128	7.8978e-301	2.81184e-131	1.62081e-304
Adcy7	4.12055e-144	0.520512	0.793	0.101	8.03136e-140	3.55198e-148	0.493382	0.809	0.159	6.92317e-144	9.42409e-169	0.460253	0.788	0.11	1.83685e-164	2.1878e-303	0.535679	0.724	0.123	4.26423e-299	4.12055e-144	8.75118e-303
Cacna1e	3.22278e-167	0.746996	0.92	0.125	6.28153e-163	4.38794e-130	0.643195	0.855	0.23	8.55253e-126	8.4806e-170	0.684254	0.803	0.117	1.65295e-165	2.05208e-300	0.629108	0.817	0.185	3.99971e-296	4.38794e-130	8.20832e-300
Cdk1	1.62798e-179	0.347795	0.467	0.015	3.1731e-175	3.47757e-197	0.32252	0.357	0.007	6.77814e-193	4.27752e-154	0.305521	0.409	0.022	8.3373e-150	1.20449e-280	0.271673	0.321	0.01	2.34767e-276	4.27752e-154	4.81795e-280
Atp2a3	2.09121e-159	0.47594	0.52	0.027	4.07597e-155	2.55694e-155	0.521218	0.523	0.049	4.98373e-151	1.45171e-164	0.392484	0.449	0.026	2.82953e-160	3.79528e-274	0.499101	0.492	0.049	7.39739e-270	2.55694e-155	1.51811e-273
Itga1	3.39794e-94	0.836263	0.56	0.072	6.62292e-90	7.1144e-117	0.626345	0.421	0.041	1.38667e-112	1.66114e-90	0.651354	0.439	0.058	3.23772e-86	7.16373e-263	0.624773	0.437	0.037	1.39628e-258	1.66114e-90	2.86549e-262
Fxyd5	8.99308e-65	0.668508	0.933	0.443	1.75284e-60	6.06369e-113	0.736093	0.872	0.288	1.18187e-108	1.94181e-83	0.6873	0.924	0.432	3.78478e-79	3.42968e-244	0.734734	0.882	0.303	6.68479e-240	8.99308e-65	1.37187e-243
Nhlh2	1.62268e-107	0.583541	0.66	0.092	3.16276e-103	4.21646e-98	0.485989	0.519	0.089	8.21831e-94	5.64142e-126	0.523619	0.561	0.07	1.09957e-121	6.30924e-241	0.481806	0.535	0.075	1.22973e-236	4.21646e-98	2.5237e-240
Csrp2	1.2666e-81	1.55441	0.987	0.638	2.46873e-77	5.60174e-109	1.46471	0.966	0.578	1.09183e-104	2.4534e-99	1.49138	0.985	0.612	4.78192e-95	5.81028e-223	1.39665	0.973	0.586	1.13248e-218	1.2666e-81	2.32411e-222
Ptn	1.14395e-67	1.09732	0.987	0.632	2.22967e-63	9.96608e-90	0.832222	0.987	0.783	1.94249e-85	5.20578e-88	1.09198	0.995	0.619	1.01466e-83	1.6689e-222	1.03833	0.991	0.759	3.25286e-218	1.14395e-67	6.67561e-222
Dcn	2.89681e-61	2.54297	0.707	0.234	5.64617e-57	2.62945e-129	2.45892	0.689	0.141	5.12507e-125	1.54287e-83	2.48602	0.682	0.194	3.0072e-79	7.54708e-220	2.43502	0.67	0.171	1.471e-215	2.89681e-61	3.01883e-219
Ctxn2	3.24281e-96	0.436318	0.813	0.176	6.32056e-92	1.39291e-111	0.43179	0.813	0.217	2.71492e-107	4.45137e-102	0.341668	0.702	0.147	8.67617e-98	5.19476e-216	0.456857	0.753	0.204	1.01251e-211	3.24281e-96	2.07791e-215
Prrx2	6.84793e-122	0.38366	0.48	0.035	1.33473e-117	4.73104e-102	0.336123	0.387	0.042	9.22127e-98	3.29701e-115	0.294634	0.399	0.034	6.42619e-111	5.28993e-215	0.329302	0.361	0.031	1.03106e-210	4.73104e-102	2.11597e-214
Plpp3	2.21486e-65	0.565949	0.873	0.292	4.31699e-61	8.16031e-79	0.493304	0.834	0.303	1.59053e-74	1.98723e-68	0.48072	0.798	0.278	3.87331e-64	3.38239e-206	0.582449	0.844	0.29	6.59261e-202	2.21486e-65	1.35295e-205
Camk2d	1.26485e-43	0.539135	0.987	0.976	2.46531e-39	1.49728e-70	0.654827	0.991	0.945	2.91835e-66	2.33474e-56	0.554698	0.995	0.961	4.55064e-52	1.47585e-198	0.774306	0.995	0.929	2.87658e-194	1.26485e-43	5.90339e-198
Faim2	5.07349e-87	0.625962	0.94	0.288	9.88873e-83	6.02153e-81	0.553471	0.936	0.461	1.17366e-76	5.39391e-88	0.530639	0.838	0.261	1.05133e-83	3.33775e-195	0.603948	0.933	0.418	6.5056e-191	6.02153e-81	1.3351e-194
Klhl1	5.5261e-93	0.635644	0.547	0.072	1.07709e-88	3.28707e-125	0.479405	0.468	0.05	6.40683e-121	1.13336e-95	0.485113	0.47	0.065	2.20903e-91	1.02334e-193	0.421151	0.387	0.044	1.9946e-189	5.5261e-93	4.09337e-193
Celf4	8.04294e-69	0.831424	1	0.913	1.56765e-64	1.00843e-82	0.747397	1	0.824	1.96553e-78	4.62638e-82	0.763642	1	0.9	9.01727e-78	3.58273e-193	0.731649	1	0.857	6.98309e-189	8.04294e-69	1.43309e-192
Sulf1	9.93357e-105	0.492147	0.927	0.217	1.93615e-100	1.26848e-104	0.485211	0.911	0.311	2.4724e-100	1.80893e-113	0.506258	0.879	0.224	3.52579e-109	1.93087e-191	0.44518	0.864	0.319	3.76345e-187	1.26848e-104	7.72346e-191
Kcnk2	1.0104e-89	0.837284	0.987	0.343	1.96937e-85	4.47214e-96	0.708775	0.962	0.426	8.71665e-92	8.07512e-106	0.786029	0.97	0.35	1.57392e-101	2.45243e-190	0.695567	0.947	0.446	4.78003e-186	1.0104e-89	9.80971e-190
Adora2b	1.68719e-53	0.395947	0.533	0.128	3.28851e-49	8.43393e-56	0.34577	0.426	0.105	1.64386e-51	1.85896e-71	0.369191	0.455	0.085	3.6233e-67	9.4009e-188	0.417541	0.468	0.077	1.83233e-183	1.68719e-53	3.76036e-187
A730017C20Rik	1.09515e-77	0.813234	0.927	0.342	2.13455e-73	1.74781e-77	0.724862	0.928	0.574	3.40666e-73	1.56824e-95	0.740919	0.904	0.314	3.05665e-91	5.25446e-186	0.718882	0.942	0.536	1.02415e-181	1.74781e-77	2.10178e-185
6330403K07Rik	1.31784e-65	1.28904	1	0.75	2.5686e-61	1.16175e-79	0.967551	0.996	0.857	2.26437e-75	4.87102e-78	1.21137	1	0.74	9.4941e-74	1.67169e-181	0.892054	1	0.877	3.25829e-177	1.31784e-65	6.68675e-181
Hpcal1	3.14856e-69	0.886822	0.993	0.786	6.13686e-65	1.96779e-80	0.648846	0.996	0.86	3.83542e-76	3.26325e-80	0.797321	1	0.777	6.3604e-76	3.50662e-180	0.641455	0.998	0.883	6.83476e-176	3.14856e-69	1.40265e-179
Cyfip2	3.70393e-72	0.747818	1	0.952	7.21932e-68	1.87651e-84	0.627577	1	0.94	3.6575e-80	1.12197e-81	0.672514	1	0.958	2.18683e-77	4.43919e-175	0.61039	1	0.967	8.65243e-171	3.70393e-72	1.77568e-174
Vat1l	1.15407e-77	0.808621	0.953	0.378	2.24939e-73	9.82265e-81	0.610811	0.923	0.399	1.91453e-76	8.3629e-92	0.766262	0.914	0.35	1.63001e-87	9.81385e-175	0.672937	0.898	0.411	1.91282e-170	1.15407e-77	3.92554e-174
Ahi1	6.00607e-58	0.743019	0.993	0.885	1.17064e-53	8.64528e-85	0.709173	0.996	0.863	1.68505e-80	9.52803e-66	0.694919	0.99	0.838	1.85711e-61	8.85675e-173	0.637616	0.993	0.832	1.72627e-168	6.00607e-58	3.5427e-172
St3gal5	3.66163e-62	0.626131	0.76	0.246	7.13689e-58	1.14817e-58	0.487815	0.638	0.234	2.2379e-54	4.63471e-86	0.595452	0.737	0.202	9.03351e-82	4.54774e-171	0.481093	0.673	0.201	8.864e-167	1.14817e-58	1.8191e-170
Heg1	3.86611e-55	0.397405	0.853	0.342	7.53544e-51	6.31091e-98	0.328453	0.711	0.176	1.23006e-93	2.75675e-43	0.279442	0.717	0.312	5.37319e-39	8.49435e-170	0.325671	0.615	0.153	1.65563e-165	2.75675e-43	3.39774e-169
Gabrg3	5.91502e-92	0.346866	0.493	0.054	1.1529e-87	5.76848e-115	0.390072	0.583	0.094	1.12433e-110	2.43835e-74	0.27707	0.379	0.051	4.75258e-70	1.35744e-168	0.314125	0.456	0.076	2.64578e-164	2.43835e-74	5.42975e-168
Cnr1	2.24929e-77	0.539246	0.92	0.314	4.38409e-73	9.74985e-96	0.636798	0.885	0.355	1.90034e-91	7.94959e-69	0.464844	0.793	0.281	1.54945e-64	3.48828e-163	0.482792	0.811	0.325	6.79901e-159	7.94959e-69	1.39531e-162
Trpv1	3.25693e-74	1.06194	1	0.53	6.34809e-70	2.31125e-79	0.749166	0.991	0.58	4.50487e-75	1.30036e-91	0.962276	1	0.558	2.53453e-87	5.10066e-155	0.70387	0.989	0.655	9.94169e-151	3.25693e-74	2.04026e-154
Steap3	9.38392e-50	0.536417	0.913	0.556	1.82902e-45	1.49373e-90	0.531158	0.94	0.441	2.91144e-86	1.97514e-65	0.617399	0.894	0.489	3.84975e-61	2.72957e-153	0.461744	0.853	0.414	5.32021e-149	9.38392e-50	1.09183e-152
Slc5a7	3.49504e-65	0.365697	0.593	0.125	6.81217e-61	1.29176e-83	0.304368	0.515	0.1	2.51777e-79	2.9371e-63	0.31342	0.576	0.15	5.72471e-59	5.70551e-153	0.306797	0.499	0.106	1.11206e-148	2.9371e-63	2.2822e-152
Kcnk3	3.73758e-78	0.729056	0.973	0.342	7.28493e-74	1.45444e-77	0.586544	0.94	0.427	2.83485e-73	5.5319e-85	0.701177	0.944	0.358	1.07822e-80	6.48609e-152	0.566763	0.9	0.413	1.2642e-147	1.45444e-77	2.59443e-151
Nrxn1	6.16132e-60	0.761086	0.993	0.938	1.2009e-55	8.29776e-72	0.532661	1	0.933	1.61732e-67	1.61943e-57	0.619931	0.99	0.936	3.15643e-53	6.52572e-152	0.493541	0.998	0.962	1.27193e-147	1.61943e-57	2.61029e-151
Tspan18	1.15366e-47	0.33693	0.76	0.274	2.2486e-43	1.32809e-70	0.276158	0.668	0.185	2.58859e-66	3.86413e-46	0.321233	0.641	0.242	7.53157e-42	1.40705e-150	0.35077	0.623	0.169	2.74248e-146	3.86413e-46	5.62819e-150
Grin3a	4.3017e-74	0.70441	0.973	0.461	8.38445e-70	3.34545e-65	0.490177	0.94	0.608	6.52062e-61	2.71262e-81	0.59385	0.949	0.453	5.28718e-77	3.8208e-149	0.522937	0.907	0.555	7.44713e-145	3.34545e-65	1.52832e-148
Rtn1	5.96875e-35	0.464126	1	0.972	1.16337e-30	6.69757e-79	0.642955	1	0.967	1.30542e-74	1.87e-29	0.373012	1	0.98	3.64482e-25	1.23248e-148	0.52171	1	0.981	2.40223e-144	1.87e-29	4.92993e-148
Bex1	7.46767e-73	1.04508	0.973	0.407	1.45552e-68	1.63154e-72	0.766293	0.979	0.566	3.18003e-68	8.03373e-81	0.957592	0.949	0.442	1.56585e-76	6.54882e-148	0.713815	0.978	0.628	1.27643e-143	1.63154e-72	2.61953e-147
Hmx1	4.44621e-59	0.413351	0.833	0.268	8.6661e-55	3.22317e-71	0.409213	0.757	0.255	6.28228e-67	3.52108e-63	0.358243	0.798	0.272	6.86294e-59	8.26924e-148	0.413335	0.748	0.255	1.61176e-143	4.44621e-59	3.30769e-147
Gng8	2.72685e-61	0.539631	0.7	0.194	5.3149e-57	1.47395e-73	0.497255	0.694	0.225	2.87287e-69	5.31771e-49	0.358957	0.571	0.177	1.03648e-44	4.00176e-143	0.476508	0.677	0.23	7.79984e-139	5.31771e-49	1.60071e-142
Elovl7	2.36483e-52	-0.598633	0.473	0.898	4.60929e-48	4.07098e-57	-0.476051	0.383	0.814	7.93475e-53	5.65845e-57	-0.54595	0.505	0.891	1.10289e-52	1.86611e-139	-0.503282	0.352	0.831	3.63723e-135	2.36483e-52	7.46443e-139
Pam	1.24019e-60	0.79717	1	0.89	2.41725e-56	2.03943e-78	0.732203	1	0.884	3.97505e-74	3.71141e-74	0.706876	0.995	0.842	7.23391e-70	1.53045e-138	0.65237	0.987	0.868	2.98301e-134	1.24019e-60	6.12181e-138
Pik3r1	1.85526e-53	0.778593	1	0.859	3.61608e-49	2.72561e-66	0.648036	0.991	0.886	5.31249e-62	7.51644e-56	0.680318	0.99	0.817	1.46503e-51	8.78534e-137	0.628449	0.998	0.851	1.71235e-132	1.85526e-53	3.51414e-136

## Sheet: PEP3
	PEP3.MaleCCI_p_val	PEP3.MaleCCI_avg_logFC	PEP3.MaleCCI_pct.1	PEP3.MaleCCI_pct.2	PEP3.MaleCCI_p_val_adj	PEP3.MaleSham_p_val	PEP3.MaleSham_avg_logFC	PEP3.MaleSham_pct.1	PEP3.MaleSham_pct.2	PEP3.MaleSham_p_val_adj	PEP3.FemaleCCI_p_val	PEP3.FemaleCCI_avg_logFC	PEP3.FemaleCCI_pct.1	PEP3.FemaleCCI_pct.2	PEP3.FemaleCCI_p_val_adj	PEP3.FemaleSham_p_val	PEP3.FemaleSham_avg_logFC	PEP3.FemaleSham_pct.1	PEP3.FemaleSham_pct.2	PEP3.FemaleSham_p_val_adj	PEP3.max_pval	PEP3.minimump_p_val
Sstr2	1.10615e-288	0.79213	0.921	0.081	2.156e-284	0	0.886657	0.944	0.152	0	0	0.737558	0.826	0.084	0	0	0.816045	0.904	0.193	0	1.10615e-288	0
Adcyap1	1.29341e-129	1.29676	1	0.552	2.52098e-125	1.87628e-233	1.13134	0.995	0.55	3.65706e-229	6.34063e-184	1.2781	0.997	0.561	1.23585e-179	4.13138e-305	0.936647	0.995	0.642	8.05247e-301	1.29341e-129	1.65255e-304
Ptprt	4.34624e-119	0.937247	0.996	0.639	8.47125e-115	3.98932e-183	0.768042	0.981	0.555	7.77558e-179	4.27571e-177	1.04555	0.989	0.626	8.33379e-173	6.95641e-272	0.738839	0.978	0.571	1.35587e-267	4.34624e-119	2.78256e-271
Map1lc3a	3.97936e-101	0.478151	1	0.984	7.75617e-97	3.46413e-161	0.470815	1	0.985	6.75194e-157	3.28891e-97	0.399954	1	0.99	6.41042e-93	6.34812e-270	0.443094	1	0.991	1.23731e-265	3.28891e-97	2.53925e-269
Npy1r	5.87998e-128	1.19054	0.983	0.373	1.14607e-123	2.31244e-187	0.908146	0.961	0.401	4.50719e-183	1.81457e-169	1.19919	0.976	0.411	3.53678e-165	2.97292e-267	0.838846	0.971	0.495	5.79452e-263	5.87998e-128	1.18917e-266
Tmem176a	1.01654e-112	1.18163	1	0.594	1.98134e-108	4.53419e-153	0.777737	0.998	0.774	8.8376e-149	9.71207e-161	1.20017	0.995	0.63	1.89298e-156	9.31633e-253	0.778604	0.994	0.812	1.81585e-248	1.01654e-112	3.72653e-252
Ttll7	8.43826e-18	-0.532355	0.983	0.951	1.6447e-13	2.30666e-162	-1.08696	0.965	0.942	4.49591e-158	2.21173e-21	-0.511747	0.981	0.956	4.31088e-17	1.12173e-252	-0.951516	0.97	0.971	2.18637e-248	8.43826e-18	4.48693e-252
Pou4f3	5.28821e-183	0.632437	0.938	0.183	1.03073e-178	6.05116e-250	0.603722	0.924	0.225	1.17943e-245	2.95753e-208	0.613636	0.88	0.203	5.76453e-204	3.22424e-251	0.43463	0.832	0.26	6.28436e-247	5.28821e-183	1.28969e-250
Nxn	1.15463e-115	0.691848	0.963	0.427	2.25049e-111	7.46797e-206	0.761117	0.958	0.49	1.45558e-201	8.18094e-156	0.725811	0.94	0.417	1.59455e-151	2.22807e-250	0.620663	0.928	0.499	4.34274e-246	1.15463e-115	8.91229e-250
Gpx3	7.04073e-132	1.34858	0.988	0.373	1.37231e-127	2.22932e-180	1.03217	0.986	0.474	4.34517e-176	2.36302e-164	1.11742	0.943	0.357	4.60576e-160	3.46343e-245	0.904824	0.979	0.53	6.75057e-241	7.04073e-132	1.38537e-244
Caln1	8.56214e-126	0.357734	0.731	0.14	1.66885e-121	2.96253e-239	0.35999	0.778	0.137	5.77426e-235	2.17789e-135	0.33782	0.636	0.137	4.24492e-131	1.70974e-227	0.321013	0.618	0.146	3.33245e-223	8.56214e-126	1.18501e-238
Ppp3ca	1.88882e-111	0.829813	1	0.968	3.68149e-107	6.52475e-179	0.723337	1	0.955	1.27174e-174	3.40975e-154	0.757646	0.997	0.972	6.64595e-150	7.49038e-238	0.609415	1	0.971	1.45995e-233	1.88882e-111	2.99615e-237
Atp2b4	1.26347e-106	0.846341	0.996	0.697	2.46263e-102	1.62325e-183	0.815273	0.984	0.569	3.16387e-179	2.84123e-158	0.924919	0.995	0.678	5.53784e-154	1.14634e-236	0.671726	0.989	0.636	2.23433e-232	1.26347e-106	4.58536e-236
1700011L22Rik	8.55066e-146	0.455275	0.851	0.188	1.66661e-141	3.24041e-187	0.351971	0.772	0.184	6.31588e-183	7.13437e-154	0.371544	0.745	0.179	1.39056e-149	9.48967e-235	0.353087	0.71	0.2	1.84963e-230	8.55066e-146	3.79587e-234
Ptprd	1.93194e-169	0.535059	0.913	0.196	3.76555e-165	1.66188e-194	0.508457	0.859	0.322	3.23916e-190	4.64239e-199	0.560671	0.807	0.18	9.04848e-195	9.30884e-234	0.440805	0.783	0.3	1.81439e-229	1.93194e-169	3.72354e-233
Gal	7.00582e-09	-1.15164	0.992	0.901	0.00013655	2.62096e-204	1.08981	0.995	0.445	5.10852e-200	3.51615e-07	-1.22515	0.997	0.932	0.00685333	5.58979e-233	0.772417	0.993	0.54	1.08951e-228	3.51615e-07	2.23591e-232
Rit2	1.77767e-110	0.876473	0.983	0.64	3.46486e-106	4.12443e-180	0.708587	0.989	0.827	8.03894e-176	1.18322e-160	0.874479	0.981	0.598	2.30621e-156	9.92819e-231	0.60368	0.984	0.854	1.9351e-226	1.77767e-110	3.97127e-230
Tmem176b	2.13574e-110	1.14913	1	0.609	4.16278e-106	1.98465e-144	0.725117	0.989	0.795	3.86829e-140	3.71604e-152	1.08536	0.997	0.647	7.24294e-148	2.01856e-227	0.690181	0.992	0.83	3.93437e-223	2.13574e-110	8.07422e-227
S100a13	1.23104e-91	0.874846	1	0.918	2.39942e-87	4.34391e-169	0.815147	0.995	0.919	8.46671e-165	1.51642e-115	0.782787	0.997	0.936	2.95566e-111	6.80161e-227	0.692059	0.992	0.94	1.3257e-222	1.23104e-91	2.72064e-226
Pla2g7	2.50804e-41	-0.493838	0.405	0.759	4.88842e-37	1.06093e-146	-0.845646	0.423	0.844	2.06786e-142	2.47932e-48	-0.456508	0.337	0.696	4.83245e-44	6.85432e-226	-0.748895	0.352	0.84	1.33598e-221	2.50804e-41	2.74173e-225
Prkacb	1.01748e-43	-0.388289	0.69	0.902	1.98316e-39	2.6695e-162	-0.655406	0.591	0.891	5.20312e-158	1.41996e-54	-0.378226	0.601	0.842	2.76765e-50	1.36067e-225	-0.566342	0.505	0.895	2.65208e-221	1.01748e-43	5.44267e-225
Syt4	1.46714e-65	0.477364	1	0.961	2.8596e-61	2.98998e-187	0.750493	1	0.941	5.82777e-183	3.61069e-103	0.548973	1	0.969	7.03759e-99	4.88595e-223	0.564481	1	0.974	9.5232e-219	1.46714e-65	1.95438e-222
Bdnf	7.28177e-94	0.88391	0.992	0.711	1.41929e-89	4.62012e-183	0.828557	0.977	0.641	9.00508e-179	1.06141e-140	0.966406	0.986	0.702	2.06879e-136	1.66553e-220	0.758684	0.96	0.649	3.24628e-216	7.28177e-94	6.66211e-220
Nrsn1	5.21071e-117	1.20854	0.992	0.767	1.01562e-112	4.4035e-194	0.912076	0.989	0.829	8.58286e-190	9.56746e-155	1.11228	0.992	0.741	1.86479e-150	4.36764e-218	0.71336	0.984	0.859	8.51297e-214	5.21071e-117	1.74706e-217
Car8	2.53455e-141	1.21264	0.897	0.242	4.94009e-137	1.82276e-146	0.78723	0.882	0.378	3.55274e-142	1.3576e-211	1.23766	0.924	0.253	2.64609e-207	7.92236e-218	0.823682	0.877	0.425	1.54415e-213	2.53455e-141	3.16894e-217
Bcl11a	6.35074e-139	0.46312	0.86	0.19	1.23782e-134	7.38452e-214	0.445259	0.861	0.218	1.43932e-209	6.568e-151	0.400394	0.783	0.196	1.28017e-146	4.75295e-210	0.34848	0.751	0.24	9.26397e-206	6.35074e-139	2.95381e-213
Lgals1	7.26782e-40	0.461797	1	0.863	1.41657e-35	1.03058e-154	0.869911	0.993	0.79	2.00871e-150	3.30139e-46	0.401524	0.995	0.892	6.43473e-42	1.16508e-213	0.709291	0.997	0.852	2.27086e-209	7.26782e-40	4.66033e-213
Nrn1	0.0791537	-0.612994	0.938	0.742	1	1.06273e-123	-1.21717	0.928	0.927	2.07137e-119	0.609522	-0.691482	0.832	0.721	1	3.73791e-212	-1.17206	0.868	0.948	7.28557e-208	0.609522	1.49517e-211
Ctnnd2	8.69368e-97	0.752907	0.979	0.799	1.69449e-92	1.33169e-135	0.513551	0.965	0.794	2.59559e-131	4.93482e-137	0.743794	0.978	0.749	9.61846e-133	1.42341e-210	0.548985	0.956	0.768	2.77438e-206	8.69368e-97	5.69365e-210
Aprt	4.79106e-101	-0.860428	0.112	0.853	9.33825e-97	4.86273e-161	-0.679876	0.109	0.752	9.47795e-157	2.35369e-132	-0.846087	0.128	0.821	4.58758e-128	1.81768e-207	-0.628908	0.114	0.7	3.54283e-203	4.79106e-101	7.2707e-207
Kit	1.04652e-99	0.569074	0.959	0.398	2.03977e-95	8.33022e-173	0.570101	0.959	0.36	1.62364e-168	2.97361e-128	0.561549	0.932	0.398	5.79586e-124	3.84808e-204	0.481304	0.916	0.404	7.50029e-200	1.04652e-99	1.53923e-203
Dbpht2	1.32708e-78	0.444657	0.917	0.434	2.58661e-74	2.43604e-186	0.525847	0.912	0.362	4.74808e-182	1.88272e-95	0.376589	0.856	0.391	3.66961e-91	5.59229e-202	0.431209	0.829	0.382	1.08999e-197	1.32708e-78	2.23691e-201
Pls3	2.37156e-102	0.68374	0.992	0.879	4.6224e-98	8.54087e-153	0.549989	0.981	0.907	1.6647e-148	1.45687e-132	0.695565	0.981	0.855	2.83958e-128	3.21226e-196	0.478357	0.989	0.929	6.26101e-192	2.37156e-102	1.2849e-195
Dcdc2a	2.40281e-136	0.373736	0.558	0.064	4.68332e-132	3.05165e-177	0.447601	0.601	0.112	5.94798e-173	3.95391e-125	0.36856	0.429	0.059	7.70657e-121	3.21389e-196	0.365403	0.474	0.094	6.26419e-192	3.95391e-125	1.28555e-195
Gng5	1.90911e-82	-0.754098	0.876	0.966	3.72105e-78	2.84464e-124	-0.738775	0.847	0.944	5.54448e-120	1.96132e-112	-0.739267	0.774	0.953	3.82281e-108	1.37892e-193	-0.678139	0.783	0.938	2.68766e-189	1.90911e-82	5.51569e-193
Btbd3	5.58474e-98	0.793114	0.959	0.612	1.08852e-93	7.5175e-119	0.550055	0.947	0.763	1.46524e-114	2.1157e-144	0.794655	0.946	0.546	4.12372e-140	1.51884e-192	0.555551	0.929	0.707	2.96037e-188	5.58474e-98	6.07535e-192
Jun	6.07768e-42	0.445828	1	0.954	1.1846e-37	1.19865e-144	0.686072	0.993	0.806	2.3363e-140	1.019e-51	0.418409	0.989	0.943	1.98614e-47	4.37359e-192	0.642131	0.992	0.844	8.52457e-188	6.07768e-42	1.74944e-191
Cyp1b1	6.59619e-80	0.426468	0.818	0.266	1.28566e-75	8.74772e-185	0.408931	0.762	0.174	1.70502e-180	7.43162e-96	0.430812	0.812	0.295	1.4485e-91	3.2208e-189	0.34614	0.68	0.208	6.27767e-185	6.59619e-80	1.28832e-188
Kcnk3	5.73019e-128	0.806298	0.967	0.321	1.11687e-123	1.0526e-166	0.579465	0.929	0.369	2.05162e-162	2.1154e-173	0.83567	0.954	0.327	4.12313e-169	4.78052e-189	0.464589	0.87	0.386	9.31771e-185	5.73019e-128	1.91221e-188
Tac1	5.35181e-111	1.69519	1	0.725	1.04312e-106	2.85776e-110	0.750773	1	0.919	5.57005e-106	9.29993e-153	1.60094	1	0.813	1.81265e-148	5.02784e-188	0.829201	1	0.941	9.79977e-184	2.85776e-110	2.01114e-187
Pigk	1.09461e-99	0.654258	0.983	0.891	2.1335e-95	1.16105e-168	0.614367	0.975	0.862	2.26301e-164	6.41732e-102	0.600587	0.959	0.87	1.2508e-97	7.04995e-186	0.538548	0.954	0.871	1.37411e-181	1.09461e-99	2.81998e-185
Lsamp	3.46819e-20	-0.357807	0.318	0.631	6.75986e-16	1.32864e-91	-0.572411	0.395	0.77	2.58966e-87	3.31515e-28	-0.34875	0.269	0.576	6.46155e-24	1.5455e-183	-0.564582	0.209	0.748	3.01234e-179	3.46819e-20	6.182e-183
H2afy	3.05431e-54	0.428107	0.979	0.949	5.95316e-50	1.20765e-153	0.515916	0.989	0.914	2.35383e-149	4.41106e-67	0.394916	0.984	0.936	8.5976e-63	2.34361e-183	0.460006	0.985	0.916	4.56792e-179	3.05431e-54	9.37443e-183
Fxyd7	9.83718e-68	0.6543	1	0.858	1.91737e-63	3.84469e-124	0.651928	1	0.758	7.49369e-120	7.14419e-93	0.638459	1	0.876	1.39247e-88	3.46894e-183	0.611088	1	0.772	6.76131e-179	9.83718e-68	1.38758e-182
Btg2	3.21271e-86	0.829721	0.963	0.673	6.26189e-82	2.85843e-155	0.773388	0.947	0.545	5.57136e-151	1.43974e-93	0.745922	0.929	0.664	2.80619e-89	2.73882e-182	0.634498	0.917	0.565	5.33824e-178	3.21271e-86	1.09553e-181
Ankrd33b	4.71799e-68	0.26545	0.806	0.304	9.19584e-64	3.11887e-157	0.347739	0.744	0.231	6.079e-153	1.1473e-75	0.282297	0.75	0.314	2.2362e-71	2.02119e-180	0.317188	0.676	0.242	3.9395e-176	4.71799e-68	8.08476e-180
Kcns2	4.44237e-161	0.282245	0.756	0.11	8.65861e-157	1.34473e-178	0.28288	0.7	0.162	2.621e-174	7.35633e-158	0.259007	0.63	0.112	1.43382e-153	1.00052e-176	0.26718	0.577	0.165	1.95011e-172	7.35633e-158	5.3789e-178
Aqp1	1.35372e-96	0.897541	0.996	0.708	2.63853e-92	1.46794e-177	0.820094	1	0.749	2.86116e-173	2.08152e-121	0.824462	0.992	0.754	4.05709e-117	1.45316e-168	0.558439	0.994	0.825	2.83236e-164	1.35372e-96	5.87176e-177
Calca	2.07339e-102	1.58199	1	0.911	4.04125e-98	1.48793e-122	0.88148	1	0.964	2.90012e-118	1.35014e-138	1.44585	1	0.961	2.63155e-134	3.037e-177	0.770053	1	0.972	5.91942e-173	2.07339e-102	1.2148e-176
Ndnf	4.94784e-111	0.2934	0.665	0.122	9.64384e-107	1.39214e-176	0.338016	0.76	0.19	2.71342e-172	2.65409e-137	0.317347	0.598	0.111	5.17308e-133	1.63098e-133	0.264189	0.61	0.227	3.17894e-129	4.94784e-111	5.56855e-176

## Sheet: PEP4
	PEP4.MaleCCI_p_val	PEP4.MaleCCI_avg_logFC	PEP4.MaleCCI_pct.1	PEP4.MaleCCI_pct.2	PEP4.MaleCCI_p_val_adj	PEP4.MaleSham_p_val	PEP4.MaleSham_avg_logFC	PEP4.MaleSham_pct.1	PEP4.MaleSham_pct.2	PEP4.MaleSham_p_val_adj	PEP4.FemaleCCI_p_val	PEP4.FemaleCCI_avg_logFC	PEP4.FemaleCCI_pct.1	PEP4.FemaleCCI_pct.2	PEP4.FemaleCCI_p_val_adj	PEP4.FemaleSham_p_val	PEP4.FemaleSham_avg_logFC	PEP4.FemaleSham_pct.1	PEP4.FemaleSham_pct.2	PEP4.FemaleSham_p_val_adj	PEP4.max_pval	PEP4.minimump_p_val
Plp1	1.01641e-47	0.512203	1	0.316	1.98109e-43	3.91397e-111	0.276822	1	0.257	7.62872e-107	8.47877e-73	0.614371	0.992	0.284	1.6526e-68	3.75521e-205	0.611327	0.976	0.306	7.31928e-201	1.01641e-47	1.50208e-204
Fabp7	4.46304e-49	0.740745	1	0.379	8.69891e-45	7.17274e-103	0.380676	1	0.345	1.39804e-98	5.63162e-75	0.870671	1	0.383	1.09766e-70	2.17886e-198	0.832831	0.991	0.401	4.24681e-194	4.46304e-49	8.71542e-198
Sstr2	3.5133e-96	0.766133	0.918	0.128	6.84777e-92	7.15898e-124	0.736899	0.958	0.24	1.39536e-119	6.19598e-130	0.675412	0.898	0.132	1.20766e-125	7.00708e-194	0.617139	0.877	0.252	1.36575e-189	3.5133e-96	2.80283e-193
Dbi	1.65925e-32	0.400457	1	0.977	3.23404e-28	9.08747e-76	0.34742	1	0.97	1.77124e-71	6.244e-52	0.673135	1	0.971	1.21702e-47	3.50907e-161	0.657924	1	0.979	6.83952e-157	1.65925e-32	1.40363e-160
Cst3	5.37693e-35	0.617668	1	0.996	1.04802e-30	3.48039e-79	0.500101	1	0.995	6.78363e-75	1.26448e-55	0.766175	1	0.994	2.46459e-51	9.92497e-160	0.702801	1	0.993	1.93448e-155	5.37693e-35	3.96999e-159
Fos	1.73939e-19	0.37979	0.941	0.748	3.39024e-15	4.95383e-47	0.265764	0.991	0.696	9.6555e-43	1.7966e-39	0.505348	0.984	0.67	3.50175e-35	1.86739e-126	0.613843	0.994	0.707	3.63974e-122	1.73939e-19	7.46957e-126
Ptprt	8.21972e-37	0.835402	0.988	0.659	1.6021e-32	4.77174e-63	0.631547	0.991	0.602	9.3006e-59	5.43661e-52	0.812851	0.992	0.651	1.05965e-47	2.27213e-121	0.612269	0.965	0.604	4.4286e-117	8.21972e-37	9.08851e-121
Adcyap1	1.51145e-39	1.05629	1	0.577	2.94597e-35	8.59245e-69	0.799612	1	0.599	1.67476e-64	2.21615e-54	1.0227	0.992	0.591	4.3195e-50	1.23996e-117	0.691263	0.996	0.67	2.41681e-113	1.51145e-39	4.95985e-117
Ctnnd2	9.03089e-39	0.806506	1	0.808	1.76021e-34	9.70873e-57	0.521883	0.972	0.812	1.89233e-52	4.82207e-48	0.680669	0.992	0.764	9.39869e-44	3.89576e-115	0.539648	0.965	0.782	7.59322e-111	9.03089e-39	1.5583e-114
Nxn	2.7262e-39	0.691848	0.941	0.457	5.31363e-35	5.24619e-77	0.665655	0.977	0.54	1.02253e-72	5.22653e-55	0.632709	0.953	0.452	1.0187e-50	3.8765e-114	0.505997	0.944	0.531	7.55568e-110	2.7262e-39	1.5506e-113
Atp2b4	4.50926e-34	0.841534	0.965	0.714	8.78901e-30	4.66508e-59	0.600814	0.995	0.614	9.0927e-55	1.67153e-49	0.77121	0.984	0.7	3.25799e-45	4.4309e-114	0.57443	0.987	0.664	8.63627e-110	4.50926e-34	1.77236e-113
Ttll7	4.39901e-08	-0.514627	0.988	0.952	0.000857412	7.39391e-63	-1.08294	0.953	0.946	1.44115e-58	1.51286e-15	-0.627079	0.977	0.958	2.94872e-11	1.25415e-110	-0.830973	0.981	0.97	2.44447e-106	4.39901e-08	5.01661e-110
Jun	4.30218e-12	0.322281	1	0.957	8.38538e-08	2.65651e-50	0.57491	0.991	0.827	5.1778e-46	3.39287e-18	0.351677	1	0.945	6.61305e-14	4.99663e-110	0.635405	0.996	0.855	9.73894e-106	4.30218e-12	1.99865e-109
Npy1r	1.30386e-39	1.07696	0.965	0.408	2.54136e-35	2.03596e-53	0.627064	0.939	0.465	3.96828e-49	1.37549e-55	1.00338	0.984	0.448	2.68097e-51	2.34793e-108	0.667168	0.963	0.533	4.57635e-104	1.30386e-39	9.39171e-108
Pou4f3	1.25914e-49	0.518352	0.859	0.227	2.4542e-45	1.97178e-73	0.447149	0.892	0.305	3.84319e-69	3.24167e-69	0.481873	0.898	0.249	6.31834e-65	4.66754e-108	0.358227	0.799	0.308	9.0975e-104	1.25914e-49	1.86702e-107
Gpx3	7.09985e-47	1.31121	0.988	0.408	1.38383e-42	1.0183e-63	0.826906	0.991	0.531	1.98478e-59	3.04889e-60	1.00219	0.969	0.395	5.94259e-56	2.01702e-107	0.70652	0.97	0.566	3.93137e-103	7.09985e-47	8.06806e-107
Nrn1	0.931225	-0.635168	0.835	0.756	1	1.21494e-48	-1.19716	0.93	0.927	2.36805e-44	0.0354677	-0.751205	0.766	0.731	1	2.75852e-104	-1.11003	0.855	0.942	5.37664e-100	0.931225	1.10341e-103
Ppp3ca	3.1757e-40	0.794593	1	0.97	6.18975e-36	2.09688e-57	0.584455	1	0.96	4.08704e-53	7.23156e-48	0.630408	1	0.974	1.4095e-43	6.13112e-104	0.493626	0.998	0.974	1.19502e-99	3.1757e-40	2.45245e-103
Nrsn1	2.05871e-36	1.04282	0.976	0.78	4.01262e-32	2.77176e-74	0.771533	0.995	0.846	5.40243e-70	1.93674e-55	0.978841	1	0.757	3.7749e-51	2.24412e-102	0.611099	0.985	0.869	4.37402e-98	2.05871e-36	8.97649e-102
Kit	5.82253e-32	0.523251	0.929	0.43	1.13487e-27	2.85637e-67	0.497982	0.991	0.425	5.56736e-63	3.18958e-42	0.457662	0.945	0.434	6.21681e-38	6.19776e-97	0.405773	0.918	0.444	1.208e-92	5.82253e-32	2.4791e-96
Car8	2.22064e-40	0.962474	0.859	0.28	4.32825e-36	6.0978e-50	0.681637	0.864	0.436	1.18852e-45	3.85586e-65	0.957581	0.922	0.298	7.51547e-61	1.73838e-96	0.61315	0.881	0.46	3.38828e-92	2.22064e-40	6.95352e-96
1700011L22Rik	9.02352e-35	0.306965	0.753	0.228	1.75878e-30	3.85153e-76	0.362342	0.798	0.247	7.50702e-72	1.76252e-54	0.385962	0.758	0.217	3.43533e-50	1.00486e-94	0.272718	0.677	0.242	1.95857e-90	9.02352e-35	4.01944e-94
Rit2	6.37102e-37	0.771772	0.988	0.659	1.24177e-32	9.60144e-53	0.510577	0.995	0.845	1.87142e-48	9.63931e-53	0.748873	0.984	0.624	1.8788e-48	5.01739e-94	0.468941	0.989	0.864	9.77939e-90	6.37102e-37	2.00695e-93
Gpr149	7.82131e-31	0.464444	0.812	0.321	1.52445e-26	1.79841e-42	0.288352	0.859	0.416	3.50529e-38	3.66624e-46	0.403904	0.844	0.327	7.14586e-42	1.2995e-93	0.348955	0.861	0.44	2.53285e-89	7.82131e-31	5.198e-93
Zeb2	7.41532e-33	0.658887	0.988	0.732	1.44532e-28	1.12005e-47	0.426653	0.981	0.575	2.18309e-43	6.07438e-39	0.572236	0.977	0.713	1.18396e-34	2.45939e-93	0.434947	0.968	0.601	4.79361e-89	7.41532e-33	9.83758e-93
Tmem176a	1.29286e-30	0.883783	1	0.616	2.51991e-26	2.2562e-47	0.596381	1	0.798	4.39755e-43	1.86553e-49	0.983861	0.992	0.655	3.63611e-45	2.60884e-92	0.561242	0.998	0.826	5.08489e-88	1.29286e-30	1.04354e-91
Syt4	1.71226e-21	0.409361	1	0.963	3.33736e-17	2.19318e-58	0.583977	1	0.947	4.27473e-54	5.04669e-25	0.388259	1	0.971	9.8365e-21	5.55176e-91	0.432165	1	0.976	1.08209e-86	1.71226e-21	2.22071e-90
Bdnf	3.80099e-23	0.720016	0.929	0.729	7.40851e-19	3.18174e-56	0.605647	0.991	0.677	6.20152e-52	7.47473e-38	0.700715	0.992	0.721	1.4569e-33	6.00823e-91	0.534333	0.955	0.674	1.17106e-86	3.80099e-23	2.40329e-90
Tmem176b	8.10068e-32	0.910497	1	0.631	1.5789e-27	2.16805e-48	0.615261	1	0.816	4.22574e-44	2.04838e-50	0.984798	0.992	0.671	3.9925e-46	3.19249e-89	0.54717	0.998	0.842	6.22248e-85	8.10068e-32	1.277e-88
Pla2g7	2.28396e-11	-0.420743	0.435	0.738	4.45167e-07	2.85902e-48	-0.775629	0.455	0.795	5.57251e-44	1.08898e-19	-0.474023	0.312	0.673	2.12253e-15	8.93545e-89	-0.637396	0.429	0.795	1.74161e-84	2.28396e-11	3.57418e-88
Hspa1b	4.73243e-22	0.468293	0.882	0.571	9.22399e-18	6.05933e-36	0.300953	0.897	0.682	1.18102e-31	5.61512e-44	0.634727	0.938	0.515	1.09444e-39	2.48539e-88	0.552543	0.913	0.668	4.84426e-84	4.73243e-22	9.94154e-88
Kcnk3	2.91085e-39	0.702973	0.953	0.357	5.67354e-35	1.63332e-60	0.45925	0.958	0.43	3.1835e-56	2.33143e-63	0.758177	0.977	0.369	4.54419e-59	4.70367e-88	0.369563	0.883	0.423	9.16792e-84	2.91085e-39	1.88147e-87
Gal	0.00533634	-1.21348	1	0.905	1	1.1424e-60	0.776761	0.995	0.506	2.22664e-56	0.0044911	-1.22892	1	0.936	1	1.13508e-86	0.528501	0.983	0.577	2.21239e-82	0.00533634	4.54033e-86
Snx7	2.58772e-14	-0.343891	0.424	0.783	5.04373e-10	8.71353e-45	-0.564675	0.507	0.796	1.69835e-40	9.21249e-17	-0.307695	0.375	0.716	1.79561e-12	8.03361e-84	-0.497061	0.42	0.772	1.56583e-79	2.58772e-14	3.21345e-83
Junb	1.82095e-18	0.474065	0.976	0.906	3.54921e-14	1.30101e-35	0.412902	0.977	0.864	2.5358e-31	5.98176e-31	0.572884	0.984	0.884	1.16591e-26	5.30832e-83	0.506404	0.974	0.849	1.03464e-78	1.82095e-18	2.12333e-82
Btg2	2.03712e-23	0.624761	0.918	0.691	3.97055e-19	4.72194e-45	0.539604	0.944	0.59	9.20354e-41	9.62314e-33	0.589554	0.945	0.682	1.87565e-28	1.824e-82	0.491655	0.918	0.593	3.55515e-78	2.03712e-23	7.29598e-82
Cyp1b1	9.77806e-23	0.332974	0.776	0.299	1.90584e-18	7.23092e-82	0.362686	0.826	0.235	1.40938e-77	1.44165e-29	0.339254	0.797	0.33	2.80993e-25	4.81299e-77	0.273804	0.645	0.248	9.38099e-73	9.77806e-23	2.89237e-81
Aqp1	2.65405e-34	0.83533	1	0.724	5.173e-30	2.54767e-59	0.666675	1	0.777	4.96566e-55	2.09355e-44	0.709263	0.992	0.77	4.08054e-40	3.91159e-81	0.478987	0.991	0.838	7.62409e-77	2.65405e-34	1.56464e-80
Prkacb	1.69873e-10	-0.328215	0.718	0.889	3.311e-06	6.78089e-44	-0.531406	0.671	0.852	1.32166e-39	2.11299e-13	-0.312087	0.664	0.823	4.11844e-09	1.45821e-80	-0.450174	0.643	0.852	2.84219e-76	1.69873e-10	5.83282e-80
Map1lc3a	1.01604e-30	0.406873	1	0.985	1.98037e-26	2.51137e-37	0.31713	1	0.987	4.89491e-33	8.49515e-37	0.347416	1	0.991	1.65579e-32	2.01967e-80	0.292381	1	0.992	3.93654e-76	1.01604e-30	8.07868e-80
Rcan2	1.89334e-27	-0.604291	0.318	0.829	3.6903e-23	8.13519e-42	-0.690008	0.366	0.732	1.58563e-37	1.74473e-29	-0.522303	0.344	0.769	3.40066e-25	2.04516e-80	-0.621986	0.312	0.701	3.98622e-76	1.89334e-27	8.18064e-80
Bcl11a	8.48057e-47	0.416814	0.847	0.227	1.65295e-42	1.07406e-79	0.39018	0.887	0.288	2.09345e-75	9.35796e-65	0.417364	0.844	0.233	1.82396e-60	3.92193e-79	0.260366	0.699	0.284	7.64424e-75	8.48057e-47	4.29624e-79
Pls3	3.09094e-35	0.660623	0.988	0.885	6.02455e-31	6.5104e-53	0.432938	0.991	0.915	1.26894e-48	7.16871e-42	0.531132	0.984	0.863	1.39725e-37	3.50562e-79	0.373727	0.987	0.934	6.83281e-75	3.09094e-35	1.40225e-78
Fxyd7	1.99741e-21	0.600504	0.988	0.867	3.89316e-17	1.85016e-39	0.521774	1	0.785	3.60614e-35	2.9672e-30	0.555283	0.992	0.885	5.78337e-26	4.18687e-79	0.490792	0.998	0.79	8.16062e-75	1.99741e-21	1.67475e-78
Dbpht2	3.91314e-28	0.39601	0.918	0.461	7.6271e-24	5.44817e-49	0.363259	0.878	0.425	1.0619e-44	2.13852e-27	0.291186	0.836	0.423	4.16819e-23	1.37648e-78	0.294242	0.814	0.419	2.68289e-74	2.13852e-27	5.50591e-78
Ptprd	1.388e-55	0.565186	0.894	0.237	2.70534e-51	3.75672e-65	0.403335	0.883	0.38	7.32223e-61	2.01491e-59	0.38304	0.797	0.223	3.92726e-55	5.19996e-78	0.303381	0.716	0.344	1.01352e-73	1.388e-55	2.07998e-77
Pigk	2.14028e-20	0.492228	0.941	0.897	4.17162e-16	1.08135e-56	0.508788	0.986	0.874	2.10766e-52	1.54704e-39	0.537223	0.992	0.875	3.01534e-35	5.25378e-78	0.438995	0.95	0.878	1.02401e-73	2.14028e-20	2.10151e-77
S1pr3	7.02453e-36	0.60805	0.965	0.408	1.36915e-31	5.43801e-49	0.456824	0.981	0.523	1.05992e-44	5.69918e-45	0.592622	0.945	0.399	1.11083e-40	5.31995e-77	0.352858	0.926	0.529	1.03691e-72	7.02453e-36	2.12798e-76
Ifitm2	2.50377e-20	0.401692	0.812	0.409	4.8801e-16	7.619e-52	0.57769	0.901	0.481	1.48502e-47	2.70953e-36	0.600335	0.883	0.428	5.28114e-32	1.33571e-76	0.484673	0.827	0.47	2.60343e-72	2.50377e-20	5.34284e-76
6330403K07Rik	9.03348e-33	0.944113	0.988	0.756	1.76071e-28	3.17081e-51	0.636296	1	0.858	6.18022e-47	4.90065e-45	0.85371	1	0.745	9.55186e-41	3.98121e-76	0.485277	1	0.879	7.75979e-72	9.03348e-33	1.59249e-75

## Sheet: PEP5
	PEP5.MaleCCI_p_val	PEP5.MaleCCI_avg_logFC	PEP5.MaleCCI_pct.1	PEP5.MaleCCI_pct.2	PEP5.MaleCCI_p_val_adj	PEP5.MaleSham_p_val	PEP5.MaleSham_avg_logFC	PEP5.MaleSham_pct.1	PEP5.MaleSham_pct.2	PEP5.MaleSham_p_val_adj	PEP5.FemaleCCI_p_val	PEP5.FemaleCCI_avg_logFC	PEP5.FemaleCCI_pct.1	PEP5.FemaleCCI_pct.2	PEP5.FemaleCCI_p_val_adj	PEP5.FemaleSham_p_val	PEP5.FemaleSham_avg_logFC	PEP5.FemaleSham_pct.1	PEP5.FemaleSham_pct.2	PEP5.FemaleSham_p_val_adj	PEP5.max_pval	PEP5.minimump_p_val
Foxp2	0	0.79547	0.81	0.024	0	0	0.982878	0.902	0.028	0	0	0.800151	0.795	0.018	0	0	0.912109	0.85	0.038	0	0	0
Kcnk9	1.28717e-282	0.388587	0.585	0.015	2.50883e-278	0	0.591967	0.765	0.015	0	0	0.455573	0.567	0.01	0	0	0.552811	0.699	0.022	0	1.28717e-282	0
Trpm8	2.37085e-200	0.590079	0.452	0.016	4.62103e-196	0	0.775807	0.805	0.029	0	2.23855e-251	0.634221	0.448	0.015	4.36316e-247	0	0.621292	0.651	0.027	0	2.37085e-200	0
Ntm	1.45358e-193	0.893531	0.813	0.142	2.83317e-189	1.60957e-183	0.991623	0.824	0.19	3.13721e-179	2.40717e-262	0.922901	0.81	0.113	4.69181e-258	0	0.967618	0.828	0.158	0	1.60957e-183	0
Cdh8	3.7637e-143	0.334137	0.609	0.094	7.33582e-139	8.32778e-201	0.498351	0.739	0.119	1.62317e-196	4.17447e-205	0.394103	0.596	0.067	8.13646e-201	0	0.495759	0.731	0.094	0	3.7637e-143	0
Ndst4	1.05367e-129	0.325103	0.548	0.071	2.05371e-125	1.21711e-225	0.563353	0.779	0.1	2.37226e-221	1.55163e-151	0.321822	0.487	0.056	3.02428e-147	0	0.498678	0.705	0.074	0	1.05367e-129	0
Plcd4	5.8967e-110	0.922606	0.656	0.165	1.14933e-105	8.00907e-205	1.28138	0.951	0.314	1.56105e-200	2.45575e-135	0.938035	0.653	0.158	4.7865e-131	0	1.1593	0.93	0.28	0	5.8967e-110	0
Hpca	2.36775e-89	0.934811	0.69	0.237	4.61498e-85	1.3052e-189	1.60541	0.98	0.474	2.54396e-185	8.9392e-126	0.917754	0.7	0.202	1.74234e-121	0	1.49379	0.974	0.418	0	2.36775e-89	0
Gpr26	5.29154e-169	0.466559	0.663	0.086	1.03137e-164	1.64638e-182	0.723628	0.785	0.162	3.20896e-178	3.17243e-187	0.457257	0.626	0.082	6.18338e-183	9.18122e-297	0.635126	0.713	0.119	1.78951e-292	5.29154e-169	3.67249e-296
Abi3bp	2.62366e-179	0.497048	0.748	0.108	5.11377e-175	8.67432e-176	0.639575	0.756	0.131	1.69071e-171	1.20482e-204	0.561243	0.7	0.098	2.34832e-200	2.7415e-281	0.65417	0.735	0.128	5.34346e-277	8.67432e-176	1.0966e-280
Kcnh8	5.53544e-94	0.317914	0.517	0.101	1.07891e-89	5.37128e-159	0.627685	0.687	0.136	1.04692e-154	9.27194e-140	0.372399	0.487	0.067	1.80719e-135	3.55792e-270	0.513047	0.637	0.102	6.93474e-266	5.53544e-94	1.42317e-269
Negr1	1.36121e-108	0.443416	0.707	0.195	2.65313e-104	1.81774e-172	0.732126	0.87	0.23	3.54296e-168	2.58804e-157	0.544251	0.724	0.162	5.04435e-153	3.77211e-265	0.69102	0.852	0.23	7.35221e-261	1.36121e-108	1.50884e-264
Pcdh9	2.96025e-121	0.908946	0.922	0.396	5.76983e-117	4.38937e-185	1.08267	0.987	0.38	8.55533e-181	1.33738e-162	1.00117	0.923	0.339	2.60668e-158	9.07301e-265	0.951593	0.96	0.388	1.76842e-260	2.96025e-121	3.62921e-264
Fxyd2	8.02331e-137	-2.49366	0.735	0.956	1.56382e-132	4.57928e-143	-2.94986	0.902	0.981	8.92548e-139	2.3593e-170	-2.39216	0.76	0.973	4.59851e-166	9.75516e-242	-2.79767	0.904	0.987	1.90138e-237	8.02331e-137	3.90206e-241
Tusc5	1.11087e-119	-0.922746	0.129	0.868	2.1652e-115	2.77466e-136	-1.29635	0.195	0.892	5.40809e-132	4.86786e-135	-0.94565	0.154	0.872	9.48794e-131	3.77429e-238	-1.2479	0.176	0.929	7.35647e-234	1.11087e-119	1.50972e-237
Cd24a	1.1909e-116	-1.21692	0.636	0.946	2.32119e-112	3.93631e-124	-1.43409	0.472	0.927	7.67225e-120	3.44597e-135	-1.11962	0.653	0.955	6.71655e-131	8.26495e-227	-1.38371	0.479	0.963	1.61092e-222	1.1909e-116	3.30598e-226
Scn7a	2.0345e-41	0.820185	0.912	0.83	3.96545e-37	7.94524e-149	1.09497	0.997	0.887	1.54861e-144	3.15722e-63	0.934489	0.92	0.795	6.15373e-59	1.35736e-217	0.993131	0.994	0.907	2.64563e-213	2.0345e-41	5.42944e-217
Atp2b1	2.66946e-64	0.780619	0.997	0.965	5.20305e-60	2.26597e-155	1.06181	1	0.944	4.4166e-151	8.63294e-81	0.766069	1	0.958	1.68265e-76	8.47626e-215	0.895961	0.998	0.955	1.65211e-210	2.66946e-64	3.39051e-214
Cpne5	1.1028e-79	0.485957	0.759	0.322	2.14946e-75	2.24039e-172	0.594451	0.73	0.136	4.36675e-168	4.34833e-88	0.463971	0.682	0.265	8.47534e-84	2.85981e-211	0.494012	0.631	0.133	5.57405e-207	1.1028e-79	1.14392e-210
Mif	6.42124e-36	0.496956	0.98	0.984	1.25156e-31	2.45453e-119	0.770106	1	0.987	4.78413e-115	5.14243e-48	0.534714	0.985	0.984	1.00231e-43	4.85477e-211	0.777921	0.998	0.989	9.46244e-207	6.42124e-36	1.94191e-210
Anxa5	3.75824e-76	-0.795087	0.986	0.991	7.32518e-72	5.46569e-118	-1.03447	0.98	0.988	1.06532e-113	2.04225e-105	-0.888982	0.985	0.995	3.98055e-101	1.62122e-207	-1.00745	0.986	0.993	3.15993e-203	3.75824e-76	6.48489e-207
Crip2	3.04916e-107	-0.973754	0.963	0.978	5.94312e-103	4.53047e-118	-1.10396	0.938	0.981	8.83033e-114	3.68967e-129	-0.97254	0.935	0.986	7.19153e-125	5.03465e-205	-1.04457	0.962	0.99	9.81303e-201	3.04916e-107	2.01386e-204
Chchd10	4.93267e-93	1.13174	0.969	0.796	9.61426e-89	1.5608e-127	1.28121	0.987	0.797	3.04216e-123	1.13743e-102	1.16347	0.955	0.759	2.21696e-98	2.73489e-204	1.28974	0.98	0.795	5.33057e-200	4.93267e-93	1.09396e-203
Scn10a	5.95114e-59	-0.679608	0.068	0.593	1.15994e-54	6.00386e-123	-1.15589	0.124	0.838	1.17021e-118	6.88145e-66	-0.722521	0.086	0.598	1.34126e-61	5.76134e-203	-1.06416	0.148	0.864	1.12294e-198	5.95114e-59	2.30454e-202
Necab2	1.0867e-75	0.433488	0.463	0.102	2.11809e-71	1.01219e-139	0.593148	0.788	0.201	1.97286e-135	2.89988e-98	0.408842	0.481	0.097	5.65215e-94	1.346e-202	0.644923	0.731	0.199	2.62349e-198	1.0867e-75	5.38401e-202
Gm13889	3.87976e-79	-0.983876	0.68	0.94	7.56205e-75	1.47143e-132	-1.52017	0.319	0.903	2.86795e-128	3.00394e-95	-0.959114	0.65	0.957	5.85497e-91	8.93203e-202	-1.31657	0.403	0.933	1.74094e-197	3.87976e-79	3.57281e-201
Pmp22	1.53913e-128	-1.05608	0.793	0.977	2.99991e-124	2.50612e-127	-1.21093	0.609	0.951	4.88467e-123	9.38719e-157	-1.19139	0.7	0.97	1.82966e-152	4.08199e-200	-1.15611	0.603	0.948	7.9562e-196	2.50612e-127	1.63279e-199
Scn11a	1.96642e-45	-0.539075	0.085	0.532	3.83274e-41	4.43618e-121	-1.03599	0.111	0.833	8.64656e-117	1.501e-53	-0.568657	0.098	0.547	2.9256e-49	4.6508e-200	-0.940724	0.118	0.865	9.06487e-196	1.96642e-45	1.86032e-199
Fndc5	3.9373e-40	0.666532	0.639	0.368	7.6742e-36	3.04145e-128	0.946678	0.948	0.617	5.9281e-124	3.409e-60	0.71344	0.614	0.298	6.64448e-56	1.10278e-199	0.887498	0.904	0.52	2.14942e-195	3.9373e-40	4.41111e-199
Meg3	2.18617e-67	0.739948	1	0.972	4.26106e-63	8.82292e-123	0.90523	1	0.95	1.71968e-118	6.53212e-88	0.67925	1	0.97	1.27318e-83	1.71203e-197	0.803404	1	0.981	3.33691e-193	2.18617e-67	6.84811e-197
Ociad2	4.13451e-81	0.5468	0.69	0.277	8.05858e-77	2.75525e-107	0.587286	0.554	0.122	5.37026e-103	5.43385e-107	0.565863	0.668	0.22	1.05911e-102	7.3243e-195	0.578905	0.567	0.114	1.42758e-190	4.13451e-81	2.92972e-194
S100a13	1.48133e-85	-1.0617	0.711	0.949	2.88726e-81	1.04826e-118	-1.3565	0.681	0.956	2.04316e-114	6.75757e-109	-1.10306	0.73	0.964	1.31712e-104	8.17509e-194	-1.23747	0.729	0.969	1.59341e-189	1.48133e-85	3.27004e-193
Nap1l5	3.39597e-36	0.776142	0.952	0.883	6.61909e-32	3.41244e-114	0.745691	0.993	0.932	6.65119e-110	1.02884e-46	0.749164	0.973	0.889	2.00532e-42	6.5452e-190	0.70971	0.994	0.963	1.27572e-185	3.39597e-36	2.61808e-189
Cd81	4.88849e-97	0.741982	0.98	0.773	9.52815e-93	5.78346e-102	0.728629	0.967	0.73	1.12725e-97	1.07392e-117	0.787449	0.985	0.738	2.09317e-113	4.29229e-189	0.798111	0.99	0.726	8.36611e-185	4.88849e-97	1.71692e-188
Nptn	1.18682e-58	0.479671	0.98	0.936	2.31323e-54	4.82498e-111	0.680565	0.977	0.926	9.40436e-107	2.04996e-70	0.529868	0.973	0.926	3.99557e-66	2.31286e-188	0.71282	0.996	0.94	4.508e-184	1.18682e-58	9.25145e-188
Sh3bgrl3	4.64992e-76	-0.62079	0.99	0.982	9.06316e-72	2.38873e-100	-1.01662	0.993	0.983	4.65587e-96	2.52601e-93	-0.621994	0.997	0.99	4.92346e-89	5.3201e-188	-0.912412	0.994	0.99	1.03694e-183	4.64992e-76	2.12804e-187
Nkx6-2	2.03223e-40	0.296244	0.177	0.023	3.96102e-36	8.79902e-58	0.4283	0.235	0.032	1.71502e-53	5.21273e-78	0.402387	0.214	0.018	1.01601e-73	6.4797e-186	0.485297	0.295	0.02	1.26296e-181	2.03223e-40	2.59188e-185
Tmem54	4.88897e-94	0.306277	0.493	0.093	9.52909e-90	5.33279e-70	0.453402	0.466	0.127	1.03941e-65	1.01411e-113	0.309526	0.487	0.087	1.97661e-109	7.07441e-185	0.549408	0.543	0.11	1.37887e-180	5.33279e-70	2.82976e-184
Slitrk3	8.47257e-87	0.451604	0.65	0.195	1.65139e-82	5.01574e-147	0.58351	0.87	0.295	9.77617e-143	6.7174e-95	0.421931	0.543	0.138	1.30929e-90	3.73354e-183	0.469491	0.727	0.223	7.27704e-179	8.47257e-87	1.49342e-182
Sptb	1.80715e-118	0.36456	0.759	0.201	3.52231e-114	3.5415e-147	0.555521	0.827	0.243	6.90274e-143	9.71856e-115	0.338323	0.665	0.176	1.89425e-110	1.69352e-180	0.477044	0.703	0.212	3.30083e-176	9.71856e-115	6.77406e-180
Kcnk2	2.69617e-78	0.480272	0.83	0.325	5.25511e-74	1.16936e-106	0.667919	0.925	0.417	2.2792e-102	3.06051e-85	0.460023	0.819	0.34	5.96524e-81	3.39876e-179	0.631299	0.966	0.449	6.62452e-175	2.69617e-78	1.3595e-178
Prkce	1.29227e-63	-0.484946	0.707	0.922	2.51876e-59	3.61845e-113	-0.714053	0.531	0.929	7.05273e-109	5.43082e-80	-0.532658	0.602	0.911	1.05852e-75	3.72368e-179	-0.6738	0.497	0.945	7.25782e-175	1.29227e-63	1.48947e-178
Asic1	7.08449e-115	0.443624	0.711	0.179	1.38084e-110	6.69742e-128	0.571113	0.749	0.208	1.30539e-123	7.03322e-144	0.506651	0.712	0.167	1.37085e-139	2.65963e-178	0.551323	0.695	0.208	5.18388e-174	7.08449e-115	1.06385e-177
Hjurp	2.0396e-36	0.758259	0.646	0.446	3.97539e-32	4.0667e-146	1.70827	0.925	0.544	7.9264e-142	2.28906e-50	0.836449	0.656	0.397	4.46161e-46	1.42845e-177	1.59024	0.842	0.496	2.78419e-173	2.0396e-36	5.7138e-177
Mapk3	2.99711e-91	-0.523857	0.983	0.983	5.84167e-87	9.0881e-107	-0.576725	0.997	0.982	1.77136e-102	1.60128e-102	-0.520132	0.991	0.981	3.12105e-98	1.07072e-176	-0.54967	0.998	0.991	2.08694e-172	2.99711e-91	4.28288e-176
Gsg1l	6.10909e-78	0.251329	0.486	0.104	1.19072e-73	1.60784e-130	0.403189	0.606	0.111	3.13384e-126	1.19559e-89	0.252303	0.442	0.087	2.33032e-85	3.3417e-176	0.354478	0.553	0.11	6.5133e-172	6.10909e-78	1.33668e-175
Rras	3.5546e-90	-0.664771	0.622	0.92	6.92828e-86	4.94025e-108	-0.831758	0.534	0.901	9.62905e-104	3.48218e-105	-0.668236	0.573	0.914	6.78711e-101	4.13499e-175	-0.787766	0.525	0.918	8.0595e-171	3.5546e-90	1.65399e-174
Ldhb	1.16627e-59	0.670475	0.935	0.67	2.27319e-55	5.7521e-88	0.765607	0.967	0.793	1.12114e-83	2.58709e-78	0.693676	0.941	0.663	5.04249e-74	1.0245e-170	0.911627	0.972	0.812	1.99684e-166	1.16627e-59	4.09798e-170
Rarres1	8.52844e-98	1.11513	0.847	0.357	1.66228e-93	3.20992e-129	1.23709	0.928	0.378	6.25645e-125	7.52995e-104	0.94701	0.819	0.327	1.46766e-99	3.02163e-170	1.10225	0.878	0.367	5.88946e-166	8.52844e-98	1.20865e-169
Tmem163	9.00321e-168	0.391213	0.728	0.117	1.75482e-163	4.18614e-95	0.379513	0.606	0.15	8.1592e-91	1.80968e-167	0.364369	0.62	0.093	3.52725e-163	6.98715e-150	0.342684	0.565	0.136	1.36186e-145	4.18614e-95	3.60129e-167

[truncated: 6 more sheets: PEP6, cLTMR, CCI-ind1, CCI-ind2, CCI-ind3, CCI-ind4]
