# Supplementary material for: scRNA-sequencing reveals subtype-specific transcriptomic perturbations in DRG neurons of PirtEGFPf mice in neuropathic pain condition
Source: eLife. 2022 Oct 20;11:e76063. doi: 10.7554/eLife.76063 (PMC9584610; doi:10.7554/eLife.76063)
Supplement: Supplementary file 2. [file elife-76063-supp2.xlsx]

## Sheet: Sheet1
	Male-Sham	Male-CCI	Female-Sham	Female-CCI
Total numer of cells	5019	4019	8035	6618
Total numer of doublet	837	601	1381	912
Percentage of doublet	0.166766	0.14954	0.171873	0.137806
Number of cells with less than 1500 genes	629	340	1079	1677
Percentage of cells with less than 1500 genes	0.125324	0.0845982	0.134287	0.2534
Number of cells with more than 10% MT gene expressed	457	401	666	792
Percentage of cells with more than 10% MT gene expressed	0.091054	0.0997761	0.0828874	0.119674
