# Supplementary material for: scRNA-sequencing reveals subtype-specific transcriptomic perturbations in DRG neurons of PirtEGFPf mice in neuropathic pain condition
Source: eLife. 2022 Oct 20;11:e76063. doi: 10.7554/eLife.76063 (PMC9584610; doi:10.7554/eLife.76063)
Supplement: Supplementary file 3. [file elife-76063-supp3.xlsx]

## Sheet: NP1
	p_val	avg_logFC	p_val_adj	ave_Sham	ave_CCI
Gal	1.488e-63	2.43855	2.90026e-59	0.0497235	1.29852
S100a6	5.71176e-59	-0.644019	1.11328e-54	4.81894	4.13362
Ndufv3	1.31627e-53	-0.584787	2.56553e-49	2.05008	1.47226
Fxyd2	1.42587e-53	-1.17662	2.77916e-49	4.00499	2.64835
Meg3	8.61228e-53	0.737519	1.67862e-48	2.99792	3.74411
Sprr1a	3.88048e-51	1.98027	7.56345e-47	0.389818	2.70748
Skp1a	1.54865e-50	-1.02559	3.01847e-46	2.53308	1.40721
Sox11	1.34873e-46	1.45978	2.6288e-42	0.268428	1.72901
Thy1	3.82685e-46	1.25659	7.45892e-42	0.148025	1.28612
Gap43	4.43293e-46	1.51503	8.64022e-42	1.26248	3.32706
Trnp1	5.56524e-46	-0.837237	1.08472e-41	2.32336	1.41308
Bcat1	4.91322e-45	0.606926	9.57636e-41	0.061317	0.604618
Trp53i11	1.4112e-44	0.510183	2.75056e-40	0.0417745	0.497648
Nppb	1.95701e-44	-1.1216	3.81442e-40	2.27332	0.976932
Fgf3	2.94338e-44	0.595135	5.73695e-40	0.0574866	0.589197
Aspscr1	4.4908e-44	1.11077	8.75302e-40	0.460189	1.51487
Chst2	7.88722e-44	0.772875	1.5373e-39	0.112666	0.828674
Ppp1r1c	1.308e-43	-1.09407	2.54943e-39	1.93037	0.656159
Itga7	1.53606e-43	0.737021	2.99393e-39	0.154944	0.851425
Cd9	1.78061e-43	-0.630521	3.47059e-39	2.95992	2.31016
Pxdc1	2.06141e-43	0.511957	4.01789e-39	0.046933	0.49653
Chl1	3.37491e-43	1.15317	6.57803e-39	0.29738	1.499
Hpcal1	5.40401e-43	-0.972593	1.0533e-38	2.57592	1.49203
Crip2	1.14225e-42	-0.589311	2.22636e-38	3.00325	2.39449
Tubb6	1.44876e-42	0.603058	2.82377e-38	0.0845224	0.645038
F2rl2	2.80848e-42	-0.639048	5.47402e-38	0.87923	0.23841
Lmo7	4.42271e-42	0.875735	8.62031e-38	0.217414	0.991527
Fgf13	5.91386e-42	-0.975153	1.15267e-37	2.27078	1.08462
Hsbp1l1	6.45502e-42	-0.728217	1.25815e-37	1.38517	0.598132
Ecel1	7.06884e-42	0.869301	1.37779e-37	0.143844	0.977319
Ptms	1.17771e-41	-0.655067	2.29547e-37	2.06523	1.32778
Enah	2.83862e-41	0.800218	5.53275e-37	0.157752	0.90275
Selenok	2.84276e-41	-0.558776	5.54083e-37	2.84551	2.27143
Ppp1r2	3.43661e-41	-0.760029	6.6983e-37	2.30324	1.43945
Tgfb1	3.54124e-41	0.826027	6.90224e-37	0.138506	0.920017
Eef1b2	6.50172e-41	0.527309	1.26725e-36	2.16334	2.69961
Csf1	8.24949e-41	0.551137	1.60791e-36	0.0926352	0.596367
Grina	9.67386e-41	-0.790737	1.88553e-36	2.52793	1.70527
Odc1	1.12336e-40	0.670349	2.18954e-36	0.32385	0.966622
Ldhb	1.19173e-40	-0.810875	2.3228e-36	1.24872	0.417529
Adk	4.47435e-40	-1.16231	8.72096e-36	2.73762	1.25728
Stmn2	6.31203e-40	0.601343	1.23028e-35	3.74921	4.33364
Sema6a	1.07514e-39	0.68766	2.09555e-35	0.135973	0.778946
Sst	1.56267e-39	-1.228	3.04579e-35	1.88578	0.385737
Abca1	1.73279e-39	0.617565	3.37739e-35	0.396918	1.00749
Cpne3	1.78184e-39	-0.903113	3.47298e-35	1.92271	0.940381
Basp1	1.88934e-39	1.13195	3.68251e-35	1.20693	2.55366
1700025G04Rik	2.03408e-39	0.754591	3.96463e-35	0.508757	1.25083
Sdc1	3.08333e-39	0.984951	6.00971e-35	0.355618	1.3923
Tpd52	3.73654e-39	-0.705049	7.28289e-35	2.31908	1.55596
Pde6d	5.11502e-39	-0.506462	9.9697e-35	1.06812	0.566344
Plxnc1	6.26335e-39	-0.65006	1.22079e-34	1.0543	0.390338
Scn11a	6.97666e-39	-0.665858	1.35982e-34	1.02039	0.328021
Bnip3	7.3157e-39	-0.689305	1.4259e-34	1.04731	0.359377
Nrsn1	7.82651e-39	-0.718575	1.52547e-34	1.32864	0.579846
Tmem79	8.31437e-39	-0.63971	1.62055e-34	0.922238	0.287382
Tubb2b	1.02396e-38	0.884469	1.9958e-34	2.61542	3.52825
Mei1	1.65312e-38	-0.61878	3.2221e-34	0.77834	0.176443
Kif5c	1.73977e-38	0.574371	3.39098e-34	0.910909	1.52027
Dtnbp1	1.86182e-38	0.698124	3.62887e-34	0.762816	1.44289
Scg2	3.07091e-38	-0.814655	5.98551e-34	2.28888	1.30334
Crmp1	3.12248e-38	0.568845	6.08602e-34	0.631619	1.1974
Hist1h2bc	3.17901e-38	0.626915	6.1962e-34	0.676506	1.2839
Gadd45a	3.46276e-38	1.19948	6.74927e-34	0.454927	1.6411
Tnik	3.54038e-38	0.700514	6.90056e-34	0.328742	0.975557
Rhoq	5.17702e-38	0.870451	1.00905e-33	0.874808	1.79017
Sh3glb2	5.40602e-38	-0.616641	1.05369e-33	1.42104	0.772606
Lynx1	5.82701e-38	0.575209	1.13574e-33	0.130698	0.661967
Etv1	8.12709e-38	-0.907737	1.58405e-33	1.34447	0.327745
Apba2	1.04638e-37	0.741722	2.0395e-33	0.348686	1.0951
Raly	1.45171e-37	-0.515938	2.82952e-33	1.4284	0.915464
Prkca	1.55894e-37	-0.68434	3.03853e-33	1.60651	0.841345
Parm1	1.86201e-37	-0.652363	3.62924e-33	1.57581	0.840218
Cystm1	2.23703e-37	-0.522385	4.36019e-33	2.31753	1.78412
Osbpl3	2.98811e-37	-0.614132	5.82412e-33	1.43922	0.753759
Snx7	3.86376e-37	-0.5252	7.53086e-33	1.14044	0.606527
Cd47	4.10184e-37	-0.687431	7.99489e-33	2.35942	1.59171
Cyb5r1	4.3086e-37	0.661265	8.3979e-33	0.321462	0.963673
Tle1	4.3359e-37	-0.632988	8.4511e-33	1.06959	0.449929
Rtn4	4.90865e-37	0.711762	9.56744e-33	2.16463	2.91084
Cacna2d1	5.04818e-37	0.774333	9.83942e-33	0.857126	1.60624
Ift122	5.54059e-37	-0.850798	1.07992e-32	1.62662	0.661059
Tagln2	5.66493e-37	1.02513	1.10415e-32	0.530227	1.67712
Dhrs1	6.79139e-37	0.767596	1.32371e-32	0.759328	1.53761
Fam178b	7.03302e-37	-0.515493	1.37081e-32	0.634728	0.158676
Mid1ip1	8.71916e-37	-0.665488	1.69945e-32	1.38379	0.700893
Tspan8	9.67188e-37	-0.7192	1.88515e-32	1.87703	1.04677
Cd55	1.31199e-36	-0.628181	2.55721e-32	0.926156	0.323256
Serpinb1a	1.31554e-36	1.05169	2.56412e-32	0.220174	1.14803
Arpc2	1.38285e-36	0.528686	2.69532e-32	1.27683	1.80092
Mal2	1.72482e-36	-0.770895	3.36184e-32	1.23632	0.40017
Ttll7	1.78135e-36	-0.518902	3.47203e-32	1.98309	1.39449
Mmp16	1.79917e-36	0.528775	3.50677e-32	0.157784	0.644807
Qdpr	2.3371e-36	-0.529384	4.55524e-32	1.53367	0.995849
Osmr	3.18143e-36	-0.656725	6.20092e-32	1.48632	0.801186
Spop	4.74968e-36	0.518535	9.2576e-32	0.867881	1.38545
Phgdh	5.06952e-36	0.587141	9.881e-32	0.0841056	0.584276
Nefl	5.88529e-36	0.810868	1.1471e-31	1.37244	2.22031
Fabp5	5.88532e-36	1.07065	1.14711e-31	1.6692	2.74097
Acpp	6.76872e-36	-0.821842	1.31929e-31	1.39942	0.464938
Srxn1	8.11841e-36	0.888795	1.58236e-31	0.734551	1.66918
Ldb2	9.1571e-36	-0.631551	1.78481e-31	1.04239	0.372632
S100a11	1.0332e-35	1.02198	2.01381e-31	0.549621	1.78638
Hs6st2	1.10469e-35	-0.623938	2.15315e-31	0.945077	0.294018
Phf24	2.52841e-35	-0.509177	4.92813e-31	1.15668	0.63094
Dgkz	2.8075e-35	-0.630128	5.47209e-31	1.41834	0.703881
Ppp2r2b	2.9765e-35	0.699729	5.8015e-31	0.346062	0.989539
Atf3	3.12642e-35	1.12764	6.09371e-31	0.831112	2.22259
Tmem233	3.59672e-35	-1.01334	7.01038e-31	2.68994	1.12257
Paqr5	6.92806e-35	-0.507511	1.35035e-30	0.634977	0.154373
Scn10a	1.00912e-34	-0.658506	1.96687e-30	1.05092	0.369847
Anks1b	1.40813e-34	0.500149	2.74459e-30	0.156635	0.633611
Mindy4b-ps	1.40983e-34	-0.518237	2.74789e-30	0.576705	0.112059
Cysltr2	1.5867e-34	-0.604525	3.09263e-30	1.05057	0.389077
Dusp26	1.67752e-34	-0.599458	3.26965e-30	2.21158	1.55599
Hsd17b7	1.88937e-34	0.63473	3.68258e-30	0.221896	0.779069
Fam89a	2.70278e-34	-0.519569	5.26799e-30	1.61287	1.06963
Ddt	3.16869e-34	-0.511839	6.1761e-30	1.60285	1.09362
Tmsb4x	3.22668e-34	0.635013	6.28911e-30	4.02493	4.68715
Isl2	3.58774e-34	-0.815951	6.99287e-30	1.43449	0.566836
Cds2	5.65471e-34	-0.564602	1.10216e-29	1.74849	1.1653
Rgcc	5.99764e-34	0.625263	1.169e-29	0.155879	0.716335
Slc9a3r2	6.15041e-34	-0.584584	1.19878e-29	0.823172	0.255949
Phlda1	7.76344e-34	0.81301	1.51317e-29	0.299444	1.0677
Arhgdig	8.96769e-34	0.645819	1.74789e-29	0.500273	1.17041
Stmn4	9.98354e-34	1.08183	1.94589e-29	0.451203	1.73816
Pdlim7	1.11804e-33	0.52412	2.17917e-29	0.183352	0.673415
Mal	1.33975e-33	0.642578	2.6113e-29	0.335428	0.938865
Smim5	1.36166e-33	-0.576817	2.654e-29	0.77851	0.199446
Gm525	1.40146e-33	-0.960382	2.73158e-29	1.31968	0.329229
Ass1	2.88888e-33	-0.692079	5.63071e-29	0.904983	0.250935
Cd63	4.04608e-33	0.858201	7.88621e-29	0.80406	1.66318
Tnfrsf12a	4.67314e-33	0.506659	9.10841e-29	0.0934359	0.538
Col5a3	5.80816e-33	0.607497	1.13207e-28	0.355716	0.962504
Fstl1	6.24059e-33	-0.724401	1.21635e-28	2.73243	1.90036
Mtus2	7.16062e-33	0.534352	1.39568e-28	0.261027	0.753033
Klf6	8.06245e-33	0.601128	1.57145e-28	0.431383	0.999188
Ada	8.81487e-33	-0.552494	1.71811e-28	0.781372	0.251949
Pmp22	9.21819e-33	0.611424	1.79672e-28	1.0654	1.73237
Cd82	9.52369e-33	-0.590114	1.85626e-28	1.25115	0.6294
Car8	1.03396e-32	-0.527561	2.01528e-28	0.683913	0.184198
9230105E05Rik	1.29966e-32	-0.689451	2.53316e-28	0.692365	0.117597
Jak1	1.87071e-32	-0.756279	3.6462e-28	2.9238	2.00219
Dnm3	2.61408e-32	-0.551849	5.0951e-28	1.60534	0.946041
Hspb1	3.841e-32	1.11099	7.4865e-28	1.44768	2.86581
Cdkn1a	3.94097e-32	0.900652	7.68135e-28	0.591985	1.66373
Gm13889	5.3614e-32	0.863184	1.04499e-27	0.701544	1.65498
Nefm	6.30858e-32	0.553083	1.2296e-27	0.610539	1.14562
Tspo	6.61361e-32	0.717703	1.28906e-27	0.270627	0.935647
Nedd4l	7.34265e-32	-0.515387	1.43116e-27	1.08134	0.534732
Dgkh	8.27719e-32	-1.03281	1.61331e-27	2.86594	1.50552
Gfra1	1.20486e-31	0.562461	2.3484e-27	0.144561	0.620091
Anxa5	1.24134e-31	0.717747	2.4195e-27	2.01546	2.73168
Pitpnc1	1.49009e-31	-0.593498	2.90433e-27	1.85599	1.20111
Cmtm8	3.46169e-31	-0.545607	6.74719e-27	0.875919	0.313488
Gadd45g	4.75533e-31	0.793903	9.26862e-27	0.999921	1.83552
Camk1	7.01206e-31	0.679967	1.36672e-26	0.586991	1.21163
Resp18	8.82692e-31	-0.703278	1.72045e-26	1.99357	1.28916
Flrt3	1.27983e-30	0.61048	2.49453e-26	0.318614	0.984574
Mgat4b	2.06574e-30	-0.513592	4.02634e-26	1.0716	0.554901
Ttc9b	2.29974e-30	-0.523289	4.48242e-26	1.80509	1.28574
Stmn1	2.91867e-30	0.591539	5.68877e-26	2.77496	3.3652
Plekha6	3.03092e-30	-0.501304	5.90757e-26	0.945065	0.449745
Esd	3.31556e-30	0.666155	6.46235e-26	1.40832	2.07386
Clic1	3.31556e-30	0.530956	6.46235e-26	1.73616	2.2853
Ctsd	4.13442e-30	0.510797	8.05839e-26	1.27453	1.78803
Kif22	5.47979e-30	0.75403	1.06807e-25	0.493349	1.34146
Ucn	6.04164e-30	0.530612	1.17758e-25	0.0771768	0.487788
Nrip1	1.00427e-29	0.586764	1.95743e-25	0.266527	0.769813
Tesc	1.23969e-29	-0.510566	2.41627e-25	1.76088	1.20651
Marcks	1.35995e-29	0.72444	2.65068e-25	0.436769	1.23359
Vgf	2.6477e-29	0.638173	5.16062e-25	0.282351	0.910676
Fez1	2.81959e-29	-0.548742	5.49567e-25	1.29451	0.773005
S100a10	1.00659e-28	0.509851	1.96195e-24	3.12617	3.662
Mthfd2	1.50589e-28	0.561763	2.93512e-24	0.374561	0.954417
Tac1	6.67431e-28	-0.987329	1.30089e-23	1.10062	0.363918
Gnal	7.7718e-28	-0.524338	1.5148e-23	1.76372	1.19457
Tubb3	1.05855e-27	0.603216	2.06321e-23	3.38133	4.01882
Blvrb	1.11139e-27	-0.527522	2.16621e-23	1.95876	1.42428
Tuba1a	1.66663e-27	0.625119	3.24844e-23	3.54349	4.16019
Fam171b	3.36224e-27	0.510617	6.55335e-23	0.97616	1.45094
Vim	7.42544e-27	0.677176	1.44729e-22	0.560145	1.36077
Gpr139	2.05038e-26	-0.501121	3.99639e-22	0.83552	0.347267
Fxyd7	5.77561e-26	0.531648	1.12572e-21	0.302938	0.83397
Kcnh7	6.60494e-26	-0.527928	1.28737e-21	0.934136	0.400493
Tubb2a	2.00091e-25	0.696188	3.89998e-21	2.05981	2.79168
AC160336.1	3.60924e-25	0.649095	7.03477e-21	0.991649	1.68941
Htr1f	4.59335e-24	-0.536498	8.9529e-20	1.2469	0.671046
Tshz2	3.49273e-22	-0.528213	6.80768e-18	1.69097	1.06677
Il31ra	2.95131e-21	-0.509469	5.75241e-17	1.22988	0.623668
Tmem176b	2.41113e-20	-0.843343	4.69953e-16	0.823854	0.196848
Malat1	9.45743e-20	0.80501	1.84335e-15	3.73271	4.51078
Lgals3	2.10718e-19	0.587154	4.10711e-15	1.2805	2.08371
Tmem176a	3.54947e-18	-0.590407	6.91826e-14	0.656986	0.184896
Hist1h1c	1.06286e-16	0.538158	2.07163e-12	0.665957	1.15697
Lgals1	6.64165e-13	0.550829	1.29452e-08	1.59909	2.3604
Calca	3.84964e-10	-0.780221	7.50333e-06	1.16591	0.797704

## Sheet: PEP5
	p_val	avg_logFC	p_val_adj	ave_Sham	ave_CCI
Sprr1a	7.42233e-157	2.96478	1.44669e-152	0.0165971	1.65179
Usmg5	4.01873e-124	-0.639438	7.8329e-120	2.17081	1.55004
2010107E04Rik	3.76098e-103	-0.601923	7.33054e-99	2.08264	1.50064
Uqcr11	1.41424e-102	-0.506894	2.7565e-98	2.29367	1.77783
Hpca	5.25281e-95	-0.742532	1.02383e-90	1.64566	0.779871
Sox11	5.64075e-90	1.30848	1.09944e-85	0.344072	1.30814
Nts	1.04593e-88	0.91635	2.03862e-84	0.0422928	0.536619
Sez6l	8.65386e-88	0.542623	1.68672e-83	0.0072722	0.401639
Gap43	1.31632e-85	1.31129	2.56563e-81	1.38811	2.40618
Serpinb1a	2.78435e-85	0.757992	5.42697e-81	0.0185297	0.463791
Prss12	2.90995e-85	0.555777	5.67178e-81	0.0465166	0.466524
Tubb6	1.59686e-82	0.5373	3.11243e-78	0.00973707	0.405856
Vgf	2.41032e-81	0.610484	4.69795e-77	0.0310939	0.447012
Flrt3	8.81204e-78	0.806281	1.71756e-73	0.115443	0.716929
Chl1	2.00125e-77	0.926911	3.90063e-73	0.127871	0.784006
Csf1	4.37398e-73	0.562182	8.52533e-69	0.0555667	0.467933
Ank3	3.03957e-72	0.571752	5.92442e-68	1.04002	1.55796
Snap25	3.08008e-71	-0.538198	6.00338e-67	2.42028	1.8218
Sema6a	3.22952e-71	0.645107	6.29467e-67	0.0613515	0.519784
Kif22	4.9424e-69	0.894279	9.63322e-65	0.177323	0.831389
Mt3	6.04244e-69	-0.56975	1.17773e-64	2.48411	1.91262
Atf3	3.15914e-68	1.26029	6.15747e-64	0.452464	1.4289
Nrn1	6.83461e-68	-0.526433	1.33213e-63	1.31809	0.690282
Mmp16	1.65556e-67	0.512141	3.22684e-63	0.0923721	0.478826
Odc1	2.50148e-64	0.67515	4.87563e-60	0.280134	0.816483
Lgals3	2.85512e-64	0.977159	5.56492e-60	0.156155	0.826527
Stmn2	1.42506e-63	0.883828	2.77759e-59	3.204	3.84842
Rhoq	5.83819e-61	0.877152	1.13792e-56	0.255284	0.901585
Hjurp	6.77621e-61	-0.924996	1.32075e-56	1.42919	0.616996
Cacna2d1	2.1019e-60	0.733161	4.09682e-56	1.25356	1.89939
Rtn4	5.73497e-60	0.539181	1.1178e-55	2.05041	2.51046
Tac1	1.09203e-59	-0.761787	2.12847e-55	3.01605	1.75239
Cdkn1a	2.96625e-59	0.873451	5.78152e-55	0.53344	1.26097
Itga7	1.91486e-58	0.502378	3.73225e-54	0.206171	0.606014
Tubb3	4.68428e-58	0.750492	9.13013e-54	2.96059	3.55769
Chst2	6.24733e-57	0.505523	1.21767e-52	0.0580535	0.424457
S100a11	1.45636e-56	0.759696	2.83859e-52	0.647822	1.31073
Rnh1	5.32053e-56	0.726032	1.03703e-51	0.88648	1.48089
Gal	6.41342e-54	2.6134	1.25004e-49	1.14078	2.78281
Tubb2b	7.31387e-53	0.84616	1.42555e-48	1.9168	2.63297
Lmo7	1.34858e-52	0.688701	2.62852e-48	0.0873221	0.518475
Camk1	9.12067e-52	0.507108	1.77771e-47	0.612438	1.0544
Jun	7.62977e-50	0.529313	1.48712e-45	1.06948	1.69356
Tspan17	9.30279e-47	0.551687	1.81321e-42	0.856602	1.32277
Aspscr1	1.2592e-46	0.767116	2.45431e-42	0.275416	0.813926
Gadd45a	1.49199e-46	0.931614	2.90803e-42	0.372433	1.02346
Srxn1	3.14284e-46	0.678896	6.12572e-42	0.64687	1.18951
S100a6	3.19038e-46	-0.518068	6.21836e-42	4.04895	3.49289
Clic1	4.46032e-45	0.511614	8.69362e-41	1.3896	1.81983
Tuba1a	4.15397e-44	0.515892	8.0965e-40	3.29366	3.71177
Pcp4	1.61013e-42	-0.867398	3.1383e-38	2.03353	1.09738
Gm13889	2.25782e-42	0.708387	4.40071e-38	0.242089	0.737154
Jpt1	3.79164e-41	0.685371	7.39029e-37	1.40277	1.94205
Esd	1.54777e-40	0.682355	3.01676e-36	1.11748	1.63418
Gadd45g	4.45156e-40	0.704588	8.67653e-36	0.743454	1.34407
Emp3	2.41352e-38	0.5955	4.70419e-34	0.309436	0.769547
Dtnbp1	2.29664e-37	0.579997	4.47639e-33	0.530676	0.972939
AC160336.1	3.63774e-37	0.689604	7.09031e-33	0.556503	0.923757
Ppef1	1.24705e-31	0.599041	2.43062e-27	0.362513	0.790332
S100a10	3.30612e-31	0.562416	6.44396e-27	2.71845	3.13664
Serpina3n	3.47367e-29	0.614406	6.77053e-25	0.493559	0.907489
S100a4	1.44078e-27	-0.629604	2.80823e-23	1.01692	0.492519
Anxa2	2.85539e-27	0.515402	5.56543e-23	1.66351	2.12227
Thy1	6.12514e-26	0.50637	1.19385e-21	0.441436	0.870445
Tmsb4x	1.41782e-21	0.657648	2.76347e-17	4.00841	4.44521
Tagln2	3.7129e-21	0.717081	7.2368e-17	0.387867	0.866678
Lgals1	3.69886e-09	0.561725	7.20946e-05	1.1456	1.47763

## Sheet: NF1
	p_val	avg_logFC	p_val_adj	ave_Sham	ave_CCI
Sprr1a	2.51403e-71	2.40886	4.90009e-67	0.0347658	1.24304
Gal	4.84941e-53	2.87122	9.45198e-49	0.0974187	0.994829
Nts	5.6686e-38	1.59543	1.10487e-33	0.0769444	0.835394
AC160336.1	7.10312e-31	1.52781	1.38447e-26	0.769168	1.52001
Trnp1	3.1514e-27	-0.536699	6.14239e-23	2.05598	1.43729
Kif22	8.48541e-27	0.705912	1.65389e-22	0.107439	0.608444
Eef1b2	7.353e-26	0.503321	1.43317e-21	1.5239	1.94816
Atf3	2.97488e-25	1.02439	5.79834e-21	0.288227	1.01571
Npy	2.50176e-24	1.86573	4.87617e-20	0.0323169	0.636725
Stmn2	6.94192e-24	0.900271	1.35305e-19	3.16716	3.80593
Gap43	4.45092e-22	1.75778	8.67529e-18	0.274876	1.28493
Gadd45a	4.72431e-22	0.84538	9.20816e-18	0.194129	0.785731
Jun	7.59028e-20	0.57333	1.47942e-15	0.658458	1.18242
Serpinb1a	4.62431e-19	0.794733	9.01323e-15	0.127469	0.633156
Calca	1.30634e-18	-0.706796	2.54618e-14	0.812194	0.456822
Flrt3	1.55822e-18	0.55938	3.03713e-14	0.0682687	0.453803
Rgs4	2.11995e-18	-0.607012	4.13199e-14	1.3784	0.744631
Chl1	2.29724e-18	0.582824	4.47754e-14	0.0549094	0.425239
Abca1	3.45464e-18	0.549752	6.73343e-14	0.103463	0.497062
S100a11	5.59059e-18	1.451	1.08966e-13	0.145389	0.916077
Syt4	7.40704e-18	0.514527	1.44371e-13	1.31182	1.72685
S100a10	1.2278e-17	0.845155	2.3931e-13	3.18619	3.74354
Phlda1	2.66326e-17	0.806094	5.19096e-13	0.197633	0.744863
Fst	3.02665e-17	0.603837	5.89924e-13	0.0388062	0.416652
Esd	2.6301e-15	0.732995	5.12632e-11	1.06836	1.57577
Sox11	6.07315e-15	0.6067	1.18372e-10	0.238573	0.662025
Fxyd2	1.64904e-14	-0.955479	3.21414e-10	2.39191	1.32831
Car3	7.65389e-13	0.697568	1.49182e-08	0.0343429	0.400567
Cd63	8.21774e-13	0.770501	1.60172e-08	0.329431	0.864646
Gnpda2	2.16625e-12	0.568125	4.22223e-08	0.523357	0.910965
Txn1	2.17046e-11	0.502886	4.23044e-07	2.1475	2.53522
Aspscr1	3.03642e-11	0.869437	5.91828e-07	0.254982	0.761688
Rhoq	3.61754e-11	0.559447	7.05095e-07	0.588456	0.977021
Cdkn1a	3.88655e-11	0.585498	7.57528e-07	0.220599	0.609266
Jpt1	9.91785e-10	0.804047	1.93309e-05	0.989062	1.49067
Cacna2d1	2.80967e-09	0.796754	5.47633e-05	0.419028	0.91518
Camk1	5.2555e-09	0.518712	0.000102435	0.322063	0.652024
Basp1	3.6867e-08	0.600126	0.000718575	0.443315	0.888907
Tubb2b	3.92446e-08	0.679377	0.000764916	0.696684	1.1442
Spp1	2.01184e-06	0.931295	0.0392128	0.298371	0.743399
Gfra1	2.08332e-06	0.643855	0.040606	0.396965	0.811039

## Sheet: NF2
	p_val	avg_logFC	p_val_adj	ave_Sham	ave_CCI
Sprr1a	2.75692e-54	2.02306	5.37351e-50	0.0710501	1.53085
Gal	3.33291e-48	2.97335	6.49618e-44	0.116589	1.6534
Rps8	1.80391e-44	0.561815	3.51599e-40	2.32307	2.88788
Mt3	1.62686e-38	-0.693268	3.1709e-34	3.12833	2.42227
Nts	1.65217e-38	1.32935	3.22025e-34	0.0935617	0.939597
Gap43	1.78845e-37	0.732264	3.48587e-33	2.74753	3.44182
AC160336.1	6.90965e-35	1.20731	1.34676e-30	0.629116	1.60349
Rpl12	2.79441e-33	0.503083	5.44659e-29	1.34548	1.83515
6330403K07Rik	2.7945e-31	-0.739755	5.44677e-27	1.73423	0.955325
Eef1b2	1.47678e-30	0.750671	2.87839e-26	1.63685	2.32693
Snap25	2.18955e-30	-0.513771	4.26764e-26	2.39454	1.7999
Vstm2l	2.45244e-30	-0.538625	4.78005e-26	1.07993	0.512424
Sox11	4.49021e-30	1.29192	8.75187e-26	0.143741	1.11802
Sh3glb1	9.3622e-30	0.520602	1.82479e-25	0.652346	1.14577
Htr3a	1.0185e-29	-0.592963	1.98516e-25	0.991351	0.343199
Kcnab2	3.4223e-29	-0.581493	6.67041e-25	1.59802	0.933433
Rhoq	8.63315e-29	1.06769	1.68269e-24	0.438814	1.31548
Ppp1r1c	9.98547e-29	-0.582455	1.94627e-24	1.47671	0.792664
Kif22	2.85748e-28	0.807069	5.56951e-24	0.240087	0.906567
Stmn2	3.06285e-28	0.648472	5.96981e-24	3.64952	4.20618
Arpc2	7.43174e-28	0.657448	1.44852e-23	1.14112	1.71425
Hcfc1r1	1.15722e-27	-0.523333	2.25555e-23	1.75624	1.1679
Sorl1	1.29475e-27	-0.549795	2.52361e-23	1.08349	0.48468
Syt4	3.07946e-27	0.805623	6.00218e-23	1.59386	2.27958
Scn10a	3.46889e-27	-0.609389	6.76121e-23	1.32036	0.62173
Dhrs1	6.92707e-27	0.739701	1.35015e-22	0.783546	1.43754
Aspscr1	1.40559e-26	1.54014	2.73963e-22	0.238207	1.36565
Ucn	2.60765e-26	0.731908	5.08257e-22	0.0168761	0.541104
Atf3	7.7867e-26	1.56001	1.5177e-21	0.288696	1.47731
Tnfrsf12a	1.29733e-25	0.650933	2.52862e-21	0.0908642	0.609633
Lix1	1.81269e-25	0.770733	3.53311e-21	0.758829	1.48376
Flrt3	4.08882e-25	0.813493	7.96952e-21	0.1296	0.764267
Sema6a	9.42262e-25	0.7202	1.83656e-20	0.140137	0.696062
Dkk3	2.13388e-24	-0.515425	4.15914e-20	1.05774	0.459884
Nrn1	3.846e-24	-0.638759	7.49624e-20	2.00913	1.10076
Cplx2	4.31178e-24	-0.584065	8.40408e-20	1.47426	0.713507
Camk1	6.2487e-24	0.824572	1.21793e-19	0.376196	1.01331
S100a11	1.07271e-23	1.15832	2.09082e-19	0.820305	1.79321
S100b	1.75703e-23	-0.658765	3.42463e-19	2.82134	1.72676
Nsg1	2.55678e-23	0.516882	4.98342e-19	0.0702433	0.451167
Kit	2.67675e-23	-0.533058	5.21725e-19	1.21918	0.642276
Tubb2b	3.03553e-23	0.937328	5.91655e-19	1.41542	2.26568
Stmn4	6.2568e-23	0.647533	1.21951e-18	0.475763	1.04048
1700025G04Rik	1.7385e-22	0.522792	3.38851e-18	0.434547	0.882066
Arpc1b	3.46077e-22	0.546762	6.74539e-18	0.926628	1.47945
Chst2	4.33682e-22	0.595463	8.4529e-18	0.660669	1.16793
Srxn1	7.87767e-22	0.945461	1.53544e-17	1.04804	1.82413
Anks1b	8.91309e-22	0.517528	1.73725e-17	0.280845	0.733593
Fgf12	1.19918e-21	-0.595754	2.33733e-17	2.32629	1.52855
Cdkn1a	2.1497e-21	1.15051	4.18997e-17	0.263475	1.15759
Jpt1	4.74204e-21	0.775339	9.24271e-17	1.56972	2.20395
Gadd45a	7.30718e-21	0.720062	1.42424e-16	0.167472	0.736466
Esd	8.5767e-21	0.881005	1.67168e-16	1.14305	1.85704
Odc1	1.31141e-20	0.568025	2.55608e-16	0.264689	0.730979
Rph3a	1.45682e-20	-0.518592	2.8395e-16	0.942837	0.38473
Cacna2d1	1.49192e-20	0.570222	2.90791e-16	1.26978	1.77674
Dtnbp1	2.14339e-20	0.7308	4.17767e-16	0.238938	0.81567
Ly6h	3.20314e-20	-0.639043	6.24324e-16	1.77177	0.821325
Jun	3.723e-20	0.597853	7.25649e-16	0.506056	1.0686
Npy	4.38904e-20	2.0074	8.55467e-16	0.00466072	0.599315
Cd63	3.75721e-19	0.951782	7.32318e-15	0.254773	0.978092
Nptx1	5.55614e-19	-0.503304	1.08295e-14	1.29803	0.62119
Phlda1	6.77472e-19	0.651036	1.32046e-14	0.437372	0.956688
Vgf	2.28728e-18	0.508662	4.45814e-14	0.777894	1.32848
Cavin3	3.25897e-18	0.870979	6.35205e-14	0.52035	1.19003
Tspan17	4.64451e-18	0.617561	9.05262e-14	1.04828	1.57813
Vim	4.68819e-18	0.558413	9.13774e-14	0.423026	0.927688
Gadd45g	5.10355e-18	0.617469	9.94734e-14	0.692091	1.2432
Carhsp1	1.46919e-17	0.535205	2.8636e-13	0.365714	0.815606
Cd24a	2.19819e-17	0.707073	4.28448e-13	0.792703	1.39729
Pkib	1.19622e-15	0.513032	2.33154e-11	0.723684	1.19823
Emp3	7.4787e-12	0.532003	1.45767e-07	0.332523	0.748493
Hspb1	6.89408e-11	0.810837	1.34372e-06	2.18515	2.79302
Serpinb1a	3.57127e-10	0.535847	6.96077e-06	1.26949	1.76572
Gfra1	1.43009e-09	0.532619	2.78739e-05	0.103154	0.430728
Tac1	3.35099e-08	-0.503071	0.000653142	0.458644	0.21036
Tagln2	4.00725e-08	0.539554	0.000781053	0.980598	1.50316
Atf5	3.22746e-07	0.50745	0.00629063	0.38554	0.720081
Malat1	4.33589e-07	1.03002	0.00845109	2.54384	3.27588
