# Supplementary material for: scRNA-sequencing reveals subtype-specific transcriptomic perturbations in DRG neurons of PirtEGFPf mice in neuropathic pain condition
Source: eLife. 2022 Oct 20;11:e76063. doi: 10.7554/eLife.76063 (PMC9584610; doi:10.7554/eLife.76063)
Supplement: Supplementary file 4. [file elife-76063-supp4.xlsx]

## Sheet: Sheet1
Sprr1a
Gal
AC160336.1
Kif22
Atf3
Stmn2
Gap43
Gadd45a
Serpinb1a
Flrt3
S100a11
Esd
Sox11
Aspscr1
Rhoq
Cdkn1a
Cacna2d1
Camk1
Tubb2b
