# Supplementary material for: scRNA-sequencing reveals subtype-specific transcriptomic perturbations in DRG neurons of PirtEGFPf mice in neuropathic pain condition
Source: eLife. 2022 Oct 20;11:e76063. doi: 10.7554/eLife.76063 (PMC9584610; doi:10.7554/eLife.76063)
Supplement: Supplementary file 5. [file elife-76063-supp5.xlsx]

## Sheet: NP1
Gene	p_val	avg_log2FC	pct.1	pct.2	p_val_adj
Gal	2.18399e-28	0.805104	0.897	0.114	4.25681e-24
Gm8797	4.03522e-24	0.569123	0.931	0.361	7.86504e-20
Sprr1a	5.25915e-22	0.327374	0.672	0.06	1.02506e-17
Usmg5	5.46442e-22	-0.67419	1	1	1.06507e-17
Meg3	3.0716e-21	0.965166	1	1	5.98686e-17
2010107E04Rik	2.53623e-19	-0.632496	1	1	4.94336e-15
Rpl41	7.50345e-19	-0.54006	1	1	1.4625e-14
S100a6	1.24395e-18	-0.548087	1	1	2.42458e-14
Cox7c	8.9205e-18	-0.400888	1	1	1.73869e-13
Rps8	1.05065e-17	0.477951	1	1	2.04783e-13
Cox8a	2.18472e-17	-0.382942	1	1	4.25824e-13
Cox6c	9.24773e-17	-0.410875	1	1	1.80247e-12
Ndufv3	1.12744e-16	-0.616983	1	1	2.1975e-12
Elob	1.37378e-16	-0.428793	1	1	2.67764e-12
Ubl5	2.11783e-16	-0.442178	1	1	4.12787e-12
Rps15	2.73167e-16	0.414405	1	0.994	5.32429e-12
Rpl17	4.19348e-16	0.513799	1	1	8.17352e-12
Atp5j2	4.99339e-16	-0.416509	1	1	9.73261e-12
Tomm7	8.90659e-16	-0.535726	1	0.982	1.73598e-11
mt-Nd2	1.21038e-15	0.666501	1	1	2.35914e-11
Ppia	2.49337e-15	-0.389219	1	1	4.85983e-11
Rpl39	2.79275e-15	-0.42643	1	1	5.44334e-11
Rpl5	3.91971e-15	0.477608	1	0.994	7.63991e-11
Rpl23a	5.39005e-15	0.475836	1	1	1.05058e-10
mt-Co3	7.26388e-15	0.513405	1	1	1.4158e-10
Romo1	1.33814e-14	-0.427505	1	1	2.60817e-10
Rpl37a	1.55038e-14	-0.395298	1	1	3.02184e-10
Rpl37	1.55038e-14	-0.411796	1	1	3.02184e-10
Ndufa4	1.57913e-14	-0.306382	1	1	3.07788e-10
Cox5b	2.23672e-14	-0.34466	1	1	4.35958e-10
Rps28	3.04904e-14	-0.523187	1	1	5.94289e-10
Dynll1	4.07546e-14	-0.361021	1	1	7.94348e-10
Ndufa5	4.07546e-14	-0.43635	1	1	7.94348e-10
Atp5e	4.22557e-14	-0.451965	1	1	8.23606e-10
Rpl35a	4.69776e-13	-0.366269	1	1	9.15641e-09
Rpl12	6.03708e-13	0.434669	1	1	1.17669e-08
Atp5g2	1.01945e-12	-0.332938	1	1	1.987e-08
Rpl36	1.48293e-12	-0.36725	1	1	2.89038e-08
Uqcrb	1.64176e-12	-0.380453	1	1	3.19995e-08
Sem1	1.71274e-12	-0.369849	1	1	3.3383e-08
Pttg1	3.66867e-12	-0.476185	0.914	0.964	7.1506e-08
Sec61g	3.80407e-12	-0.410732	1	0.994	7.41452e-08
Ost4	3.99906e-12	-0.447239	1	1	7.79456e-08
Nop10	8.14291e-12	-0.455755	1	1	1.58714e-07
Ndufa11	1.22552e-11	-0.351317	1	1	2.38867e-07
Atp5l	1.48942e-11	-0.323972	1	0.994	2.90303e-07
Rps25	1.69548e-11	0.329906	1	0.994	3.30466e-07
Ndufa3	2.88279e-11	-0.42935	1	0.982	5.61885e-07
Uchl1	3.96557e-11	0.312636	1	1	7.7293e-07
Mrpl52	5.61676e-11	-0.389256	1	0.976	1.09476e-06
Fxyd2	5.70661e-11	-0.551803	1	1	1.11228e-06
Trmt112	8.18869e-11	-0.403365	1	0.994	1.59606e-06
Tmem256	9.13478e-11	-0.387131	1	1	1.78046e-06
Rps29	1.30588e-10	-0.294899	1	1	2.5453e-06
Uqcr11	2.13683e-10	-0.367286	1	1	4.1649e-06
Pcsk1n	2.45181e-10	-0.363221	1	1	4.77882e-06
Atp6v1f	2.52773e-10	-0.294255	1	1	4.9268e-06
Lsm7	3.69314e-10	-0.335005	0.983	0.976	7.19831e-06
Gabarapl2	3.9835e-10	-0.348639	1	1	7.76424e-06
mt-Nd1	4.04402e-10	0.453185	1	1	7.88219e-06
mt-Nd3	4.91726e-10	0.53824	1	1	9.58423e-06
Ypel3	7.69402e-10	-0.318467	1	1	1.49964e-05
Cox7a2	9.32716e-10	-0.295182	1	1	1.81796e-05
Atox1	1.00414e-09	-0.397059	1	1	1.95718e-05
Map1b	1.0809e-09	0.379106	1	1	2.10677e-05
Cox6b1	1.12966e-09	-0.263222	1	1	2.20182e-05
Ywhah	1.21574e-09	-0.272437	1	1	2.36961e-05
Fam102b	1.51289e-09	0.523025	1	0.952	2.94877e-05
Prdx1	1.70137e-09	-0.401934	1	0.994	3.31613e-05
Rpl30	2.08464e-09	-0.271211	1	1	4.06318e-05
Rps6	3.59919e-09	0.324493	1	0.994	7.01518e-05
Crip2	3.65091e-09	-0.396731	1	1	7.11598e-05
Npdc1	6.16581e-09	-0.277588	1	1	0.000120178
Skp1a	9.64352e-09	-0.52841	1	1	0.000187962
Mrps21	1.03355e-08	-0.329607	1	0.976	0.000201449
Gm42418	1.14672e-08	0.254899	1	0.994	0.000223507
mt-Nd4	1.20353e-08	0.377607	1	1	0.000234581
Kcnq1ot1	1.35937e-08	0.442892	0.966	0.729	0.000264955
Selenof	1.97136e-08	-0.282504	1	0.994	0.000384239
Dctn6	2.19768e-08	-0.326378	1	0.982	0.000428349
Atp5h	2.58533e-08	-0.259772	1	1	0.000503907
Mapre3	2.71029e-08	-0.321239	1	0.988	0.000528262
Ahnak2	2.87572e-08	0.513548	1	0.94	0.000560507
Spcs1	3.31584e-08	-0.329957	1	0.994	0.000646291
Srrm2	3.38322e-08	0.346143	1	0.994	0.000659422
Cd9	3.56927e-08	-0.467127	1	1	0.000695687
Snap91	3.6036e-08	0.37129	1	0.916	0.000702377
Immp1l	3.7148e-08	-0.301284	0.879	0.94	0.000724051
Khdrbs3	4.30188e-08	-0.358883	1	0.988	0.000838479
Ndufa1	4.35949e-08	-0.314294	1	0.994	0.000849708
Rps12	4.47689e-08	0.390601	1	1	0.000872591
mt-Nd4l	6.91915e-08	-0.400063	1	1	0.00134861
Rpl10	7.10281e-08	0.277832	1	1	0.00138441
Atp5j	7.10281e-08	-0.268618	1	1	0.00138441
Ndufs6	9.83693e-08	-0.276093	1	0.994	0.00191732
Zmynd8	1.08056e-07	0.263428	0.931	0.633	0.00210612
Uqcr10	1.20174e-07	-0.276565	1	1	0.0023423
Pfn1	1.34047e-07	-0.29351	1	1	0.00261272
Rps27	1.50422e-07	-0.385337	1	1	0.00293187
Tagln2	1.6183e-07	1.29359	0.793	0.578	0.00315423
Dynlrb1	1.62396e-07	-0.286478	1	1	0.00316526
Cops9	1.66588e-07	-0.316344	1	0.994	0.00324697
Arl6ip5	1.70885e-07	-0.328684	1	1	0.00333072
Arpc1a	1.77532e-07	-0.284738	1	1	0.00346027
Polr2k	1.79797e-07	-0.290097	1	0.982	0.00350442
Ndufb2	2.09337e-07	-0.27512	1	0.994	0.0040802
Nbl1	2.22982e-07	-0.31388	1	1	0.00434614
Rps14	2.40491e-07	0.285862	1	1	0.00468741
Hcfc1r1	2.46617e-07	-0.326448	1	1	0.00480682
Chst2	2.48437e-07	0.318883	0.31	0.054	0.00484229
Hmgb3	2.7855e-07	0.302182	0.603	0.277	0.00542921
Zfp706	2.83102e-07	-0.290325	1	1	0.00551794
Ndufb4	3.86432e-07	-0.253457	1	1	0.00753195
Mrpl23	4.01043e-07	-0.300742	1	0.994	0.00781673
Csnk1e	4.26481e-07	0.323803	1	0.964	0.00831254
Malat1	5.32187e-07	1.07289	1	1	0.0103729
Kif1b	5.58867e-07	0.301694	1	1	0.0108929
Sncg	6.01318e-07	-0.25944	1	1	0.0117203
Rack1	6.9573e-07	0.277282	1	0.988	0.0135605
Ndufa2	7.48149e-07	-0.277585	1	0.994	0.0145822
Onecut2	7.53925e-07	0.279825	0.966	0.795	0.0146948
Naa38	7.66446e-07	-0.335809	1	0.988	0.0149388
Abca1	8.92129e-07	0.374743	0.966	0.753	0.0173885
Tmem258	8.96337e-07	-0.299932	1	0.982	0.0174705
Trnp1	9.07188e-07	-0.355894	1	1	0.017682
Sdcbp	9.18141e-07	-0.291618	1	1	0.0178955
Rps21	9.4043e-07	-0.252561	1	1	0.0183299
Raly	1.07905e-06	-0.334506	1	0.994	0.0210318
Eif3c	1.08511e-06	0.344625	1	0.958	0.0211499
Hprt	1.09199e-06	-0.289215	1	1	0.0212841
Elavl3	1.17982e-06	0.2652	1	0.982	0.0229958
Ostc	1.1938e-06	-0.306709	0.983	0.976	0.0232683
Klf7	1.28205e-06	0.273843	1	1	0.0249884
Snx3	1.46004e-06	-0.274469	1	0.988	0.0284576
Dpysl3	1.65196e-06	0.295972	1	1	0.0321983
Praf2	1.91214e-06	-0.312367	1	0.994	0.0372695
Dad1	1.95726e-06	-0.265684	1	1	0.038149
Ubn2	1.96483e-06	0.256216	0.931	0.771	0.0382965
Aldoa	1.9802e-06	-0.29032	1	1	0.0385961
Selenok	2.27647e-06	-0.29231	1	1	0.0443707
Ppp1r1c	2.31635e-06	-0.406537	0.983	0.994	0.045148
Pdap1	2.4819e-06	0.270755	1	0.958	0.0483748
Snrnp70	2.49871e-06	0.269022	1	0.867	0.0487024

## Sheet: PEP5
Gene	p_val	avg_log2FC	pct.1	pct.2	p_val_adj
Sprr1a	2.84639e-81	0.303539	0.463	0.02	5.5479e-77
Rpl41	2.63076e-76	-0.553187	0.997	0.999	5.12761e-72
Usmg5	1.25405e-74	-0.806963	0.986	0.994	2.44427e-70
Elob	6.72272e-69	-0.471181	0.992	0.996	1.31032e-64
Cox8a	1.08438e-67	-0.431227	0.997	0.999	2.11357e-63
Cox7c	1.42058e-64	-0.536462	0.994	1	2.76885e-60
Gm8797	7.2448e-63	0.427897	0.661	0.197	1.41208e-58
2010107E04Rik	9.99814e-62	-0.783726	0.978	0.99	1.94874e-57
Ndufa5	6.61055e-61	-0.521299	0.983	0.988	1.28846e-56
Rps28	1.81016e-58	-0.58494	0.975	0.981	3.52817e-54
mt-Nd2	1.05062e-54	0.505997	1	0.999	2.04777e-50
Meg3	4.61067e-54	0.677669	1	1	8.98666e-50
Gm42418	1.04741e-53	0.879619	1	1	2.04152e-49
Atp5e	3.86018e-53	-0.530115	0.986	0.994	7.52388e-49
Ubl5	1.18486e-52	-0.451675	0.983	0.988	2.30942e-48
mt-Co3	3.12706e-52	0.371155	1	1	6.09496e-48
Rpl36	8.25252e-52	-0.424873	0.989	0.996	1.6085e-47
mt-Nd1	5.91557e-50	0.491365	0.997	1	1.153e-45
Ndufa1	8.23348e-50	-0.513072	0.978	0.976	1.60479e-45
Atp5l	1.44624e-49	-0.447903	0.994	0.994	2.81888e-45
Uqcr11	2.70061e-49	-0.548367	0.981	0.993	5.26377e-45
mt-Nd3	3.57738e-49	0.562281	0.997	0.989	6.97266e-45
Rpl39	1.41511e-48	-0.440854	0.994	0.999	2.75819e-44
Fxyd2	1.43278e-48	-0.716105	0.683	0.903	2.79263e-44
Atp5j2	1.54394e-47	-0.444357	0.997	0.995	3.00929e-43
Hsp90ab1	5.41529e-47	0.28149	0.997	1	1.05549e-42
Cox7a2	8.12553e-47	-0.463671	0.992	0.998	1.58375e-42
Gabarapl2	1.31415e-46	-0.369171	0.992	0.996	2.56142e-42
Ndufv3	1.32459e-46	-0.519232	0.978	0.991	2.58177e-42
Rpl17	5.0336e-46	0.507814	0.992	0.993	9.81098e-42
Rps8	6.9389e-46	0.444028	0.994	1	1.35246e-41
Rpl37	9.6244e-46	-0.445626	0.994	0.998	1.87589e-41
Tomm7	3.86815e-45	-0.477711	0.967	0.979	7.5394e-41
Pcsk1n	1.11122e-44	-0.400097	1	1	2.16588e-40
Romo1	2.71232e-44	-0.45723	0.983	0.984	5.28659e-40
mt-Nd4l	6.79099e-44	-0.605133	0.978	0.99	1.32363e-39
Sem1	1.36123e-43	-0.403727	0.983	0.994	2.65318e-39
Cox5b	1.83348e-43	-0.502987	0.992	0.999	3.57364e-39
Ndufa4	1.185e-42	-0.432902	1	1	2.30968e-38
Rpl38	5.69632e-42	-0.377019	0.992	0.998	1.11027e-37
Atpif1	6.93853e-42	-0.369226	0.994	0.999	1.35239e-37
Mt3	1.23463e-41	-0.74108	0.972	0.993	2.40642e-37
Uqcrb	3.35401e-41	-0.432435	0.983	0.996	6.5373e-37
Ypel3	5.55841e-40	-0.377599	0.994	0.993	1.08339e-35
Ndufa3	5.5641e-40	-0.520235	0.926	0.953	1.0845e-35
Ppia	7.66195e-40	-0.33882	1	1	1.49339e-35
Ndufc1	1.0928e-39	-0.432144	0.981	0.991	2.12997e-35
Nop10	1.95662e-39	-0.485035	0.964	0.988	3.81364e-35
Gm1673	1.88761e-38	-0.450138	0.986	0.99	3.67915e-34
Rps15	1.43965e-37	0.403967	0.986	0.979	2.80602e-33
Ndufb2	1.89211e-37	-0.44062	0.967	0.988	3.6879e-33
Rpl35a	3.09715e-37	-0.367334	0.994	1	6.03666e-33
Ndufs5	2.09215e-36	-0.369045	0.994	0.993	4.07782e-32
Gng3	2.61048e-36	-0.347596	0.997	0.996	5.08809e-32
Uqcr10	5.88218e-36	-0.5056	0.983	0.994	1.1465e-31
Rps25	2.90878e-35	0.367773	0.989	0.985	5.66951e-31
Rpl12	6.08552e-35	0.414091	0.986	0.98	1.18613e-30
Gpx4	1.17463e-34	-0.362777	0.994	0.999	2.28947e-30
Ndufa7	1.31108e-34	-0.361081	0.983	0.984	2.55543e-30
Rpl37a	1.51426e-34	-0.409712	0.994	0.998	2.95145e-30
Pura	8.98692e-34	0.365499	0.992	0.986	1.75164e-29
Cox6b1	1.36753e-33	-0.43871	0.994	0.995	2.66545e-29
Kif21a	7.8473e-33	0.390199	0.994	1	1.52952e-28
Cmip	1.98632e-32	0.443377	0.95	0.821	3.87154e-28
Rps14	8.10565e-32	0.331915	0.989	0.993	1.57987e-27
Serpinb1a	1.72474e-31	0.314326	0.267	0.037	3.36168e-27
Syt11	5.85095e-31	0.343104	0.997	1	1.14041e-26
Fau	1.075e-30	-0.311834	0.994	1	2.09529e-26
Rpl23a	1.67496e-30	0.337926	0.981	0.983	3.26466e-26
Dpm3	4.00572e-30	-0.392459	0.865	0.928	7.80755e-26
Rps12	5.95859e-30	0.412894	0.983	0.981	1.16139e-25
Uchl1	6.65189e-30	0.295507	0.997	1	1.29652e-25
Rpl5	1.22997e-29	0.350003	0.986	0.971	2.39733e-25
Rpl10	1.60299e-29	0.363773	1	0.994	3.12439e-25
Polr2k	4.4482e-29	-0.398033	0.909	0.955	8.66999e-25
Uqcrq	3.66459e-28	-0.408364	0.986	0.996	7.14265e-24
Snrpn	9.1443e-28	-0.292311	0.989	0.998	1.78232e-23
Hpca	1.43284e-27	-0.547746	0.967	0.979	2.79274e-23
Nme7	1.92232e-27	0.333163	0.584	0.294	3.74679e-23
Tmsb10	2.00771e-27	-0.495854	1	0.999	3.91323e-23
Ndufa2	1.39586e-26	-0.335749	0.986	0.985	2.72067e-22
Rps6	2.23606e-26	0.348798	0.994	0.99	4.3583e-22
Sec61g	2.33908e-26	-0.337645	0.975	0.97	4.5591e-22
S100a6	2.53019e-26	-0.631812	0.967	0.993	4.93159e-22
Hspe1	5.48021e-26	-0.363131	0.989	0.99	1.06815e-21
Serf2	6.01946e-26	-0.325634	0.989	0.99	1.17325e-21
Ost4	1.03166e-25	-0.367924	0.942	0.961	2.01081e-21
mt-Nd4	5.05785e-25	0.264607	1	1	9.85826e-21
Spcs1	1.12154e-24	-0.317621	0.981	0.974	2.186e-20
Lars2	2.76681e-24	0.320354	0.758	0.482	5.39278e-20
Snhg11	2.9596e-24	0.37618	0.997	1	5.76855e-20
Cops9	3.06522e-24	-0.368666	0.961	0.973	5.97443e-20
Atp5k	3.19632e-24	-0.370035	0.986	0.989	6.22994e-20
Ndufa11	3.23045e-24	-0.350429	0.989	0.99	6.29647e-20
Ndufs6	2.50276e-23	-0.311359	0.978	0.971	4.87814e-19
Mrps21	4.40034e-23	-0.354586	0.915	0.949	8.57671e-19
Klf7	4.83014e-23	0.302903	1	0.985	9.41443e-19
Rps21	1.38582e-22	-0.288876	0.994	1	2.7011e-18
Ndufb4	1.40767e-22	-0.319884	0.983	0.988	2.74369e-18
Snrpf	2.00758e-22	-0.350887	0.912	0.954	3.91298e-18
Mrpl52	3.20027e-22	-0.369508	0.948	0.953	6.23764e-18
Itm2c	3.78166e-22	-0.355577	0.981	0.98	7.37084e-18
Cox17	7.07244e-22	-0.359659	0.824	0.866	1.37849e-17
Gap43	1.07494e-21	0.474217	0.986	0.975	2.09517e-17
Sbno2	1.09558e-21	0.478922	0.727	0.498	2.13539e-17
Rps29	1.51228e-21	-0.319921	0.997	1	2.94758e-17
Tbca	1.7492e-21	-0.272333	0.989	0.99	3.40936e-17
Ctsl	2.09539e-21	0.495707	0.997	0.993	4.08413e-17
Tmem256	3.63193e-21	-0.322389	0.934	0.95	7.079e-17
Dpysl3	1.22287e-20	0.366149	0.972	0.936	2.38349e-16
Ndufb3	1.26457e-20	-0.291702	0.986	0.984	2.46478e-16
Vcp	1.45031e-20	0.280223	0.997	0.984	2.8268e-16
Pcp4	1.50593e-20	-0.850393	0.683	0.856	2.93522e-16
Atp5j	2.32937e-20	-0.313691	0.989	0.996	4.54017e-16
Sox11	2.53124e-20	0.474384	0.802	0.583	4.93365e-16
Smim26	3.00213e-20	-0.318406	0.846	0.893	5.85145e-16
Mrpl33	3.15576e-20	-0.319111	0.942	0.951	6.1509e-16
Nucks1	4.26614e-20	0.281317	0.986	0.945	8.31513e-16
Serpina3n	4.77668e-20	1.18496	0.807	0.629	9.31023e-16
Rpl22l1	5.25648e-20	-0.290525	0.994	0.999	1.02454e-15
Naa38	6.17886e-20	-0.347955	0.906	0.922	1.20432e-15
Ndrg4	2.50942e-19	-0.393931	1	0.991	4.89112e-15
Eef1b2	4.36072e-19	0.250678	0.992	0.99	8.49948e-15
Prrc2c	4.51135e-19	0.313845	0.986	0.923	8.79308e-15
Mafg	4.66958e-19	0.294876	0.961	0.854	9.10148e-15
Atox1	5.19382e-19	-0.310922	0.964	0.979	1.01233e-14
Rps27	9.42942e-19	-0.353583	0.994	0.991	1.83789e-14
Pnisr	1.0551e-18	0.366085	0.95	0.873	2.05649e-14
Mrps36	1.1517e-18	-0.303875	0.912	0.933	2.24478e-14
Cox6c	1.25854e-18	-0.326882	0.997	0.999	2.45302e-14
mt-Atp8	1.4413e-18	-0.350585	0.904	0.929	2.80923e-14
Rps3a1	1.71478e-18	0.28843	0.989	0.994	3.34227e-14
Ndufc2	1.87169e-18	-0.275951	0.981	0.995	3.6481e-14
Higd2a	1.926e-18	-0.256423	0.978	0.974	3.75396e-14
Sptbn1	1.92714e-18	0.304223	1	0.993	3.75618e-14
Pfn1	2.77219e-18	-0.286938	0.983	0.973	5.40327e-14
Ndufv2	5.06801e-18	-0.293518	0.967	0.969	9.87805e-14
Ahnak2	7.05631e-18	0.537325	0.945	0.894	1.37535e-13
Eif3f	9.11109e-18	-0.284694	0.978	0.989	1.77584e-13
Pacsin1	9.8244e-18	0.312905	0.983	0.944	1.91487e-13
Gcnt2	1.91396e-17	0.264891	0.997	0.998	3.7305e-13
Atp9a	2.21928e-17	0.309122	0.986	0.968	4.32559e-13
Ank3	3.22343e-17	0.399981	0.975	0.95	6.28278e-13
Fmc1	4.5235e-17	-0.319749	0.887	0.917	8.81675e-13
Tmx4	5.72382e-17	0.373832	0.953	0.893	1.11563e-12
Myl12b	6.23088e-17	-0.260171	0.989	0.983	1.21446e-12
Map1b	7.23667e-17	0.400159	1	1	1.4105e-12
AC149090.1	1.25928e-16	0.274558	0.733	0.496	2.45447e-12
Eprs	1.33777e-16	0.280574	0.904	0.785	2.60744e-12
Dynll1	1.38963e-16	-0.265194	0.994	0.995	2.70853e-12
Mrpl55	1.71991e-16	-0.286673	0.793	0.838	3.35228e-12
Pcdh9	1.97466e-16	0.300828	0.989	0.97	3.84881e-12
Snx3	2.53664e-16	-0.267688	0.95	0.968	4.94416e-12
Eif3a	4.97086e-16	0.272995	0.953	0.887	9.6887e-12
Stat3	5.11236e-16	0.281184	0.981	0.949	9.9645e-12
Polr2i	6.46119e-16	-0.295503	0.843	0.883	1.25935e-11
Pten	6.70556e-16	0.279366	0.983	0.963	1.30698e-11
Snrpe	7.29415e-16	-0.261635	0.964	0.976	1.4217e-11
Elavl3	9.89272e-16	0.256645	0.983	0.959	1.92819e-11
Pttg1	1.08671e-15	-0.326654	0.769	0.836	2.1181e-11
Srp19	1.33731e-15	-0.272817	0.928	0.946	2.60655e-11
Snap25	2.46765e-15	-0.359689	0.997	0.998	4.8097e-11
Kif5c	2.63181e-15	0.340033	0.959	0.887	5.12966e-11
Prelid1	2.7828e-15	-0.2731	0.934	0.948	5.42395e-11
Nrxn2	3.07587e-15	0.260943	0.959	0.904	5.99517e-11
Atxn7l3b	4.93083e-15	0.254301	0.994	0.989	9.61068e-11
Minos1	7.08025e-15	-0.261538	0.983	0.983	1.38001e-10
Hivep2	1.07791e-14	0.285983	0.904	0.783	2.10095e-10
Rala	1.98142e-14	0.273189	0.95	0.868	3.86199e-10
Atp2b1	2.06113e-14	0.267483	1	0.999	4.01736e-10
Hjurp	2.14049e-14	-0.848695	0.84	0.874	4.17203e-10
Galnt17	2.52579e-14	0.267085	0.975	0.927	4.92302e-10
A2ml1	3.29063e-14	-0.301997	0.959	0.981	6.41377e-10
Ddx24	3.53609e-14	0.255039	0.986	0.95	6.89219e-10
Skp1a	5.22673e-14	-0.263644	0.959	0.97	1.01874e-09
Jun	5.53149e-14	0.496808	0.95	0.841	1.07814e-09
Rpl36al	7.71241e-14	-0.262915	0.879	0.919	1.50322e-09
Pnn	1.30753e-13	0.269494	0.887	0.722	2.54851e-09
Rpl29	1.65573e-13	0.261798	0.992	0.966	3.22718e-09
Slc2a3	1.7456e-13	0.350807	0.78	0.626	3.40235e-09
Lsm7	2.47712e-13	-0.262283	0.931	0.928	4.82815e-09
Isca2	2.93707e-13	-0.254746	0.835	0.882	5.72465e-09
Anapc13	3.42055e-13	-0.251769	0.763	0.836	6.66699e-09
Dctn6	3.88815e-13	-0.258106	0.906	0.925	7.5784e-09
Pet100	4.02174e-13	-0.26038	0.796	0.833	7.83877e-09
Trmt112	5.04141e-13	-0.259933	0.959	0.963	9.82621e-09
Cycs	6.35e-13	-0.318158	0.975	0.976	1.23768e-08
Atp2b4	6.42341e-13	0.272673	0.802	0.57	1.25199e-08
Ankrd12	6.60491e-13	0.254517	0.964	0.912	1.28736e-08
Arpc1b	7.04846e-13	0.332523	0.931	0.88	1.37382e-08
Tmem176a	7.40273e-13	0.337029	0.953	0.919	1.44287e-08
Eno1	7.88447e-13	0.258012	0.989	0.948	1.53676e-08
Exoc3	1.01906e-12	0.256146	0.871	0.745	1.98625e-08
Hypk	2.07884e-12	-0.250227	0.884	0.902	4.05186e-08
Ank2	2.30067e-12	0.265242	0.997	0.989	4.48424e-08
Dll3	2.48103e-12	-0.291293	0.51	0.665	4.83578e-08
AY036118	3.11877e-12	0.3996	0.521	0.318	6.07879e-08
Tppp3	4.45749e-12	-0.273275	0.994	0.999	8.6881e-08
Gnaq	4.49656e-12	0.253599	0.978	0.9	8.76424e-08
Ifit1	6.81479e-12	0.362912	0.438	0.248	1.32827e-07
Ahi1	8.45594e-12	0.261413	0.981	0.951	1.64815e-07
Bdnf	9.24236e-12	0.394556	0.579	0.369	1.80143e-07
Ptprn	9.63053e-12	0.289807	0.923	0.838	1.87709e-07
Camk2g	1.24628e-11	0.263894	0.959	0.897	2.42913e-07
Idi1	1.44796e-11	-0.268533	0.934	0.954	2.82221e-07
Sdhd	1.67034e-11	-0.254828	0.887	0.895	3.25567e-07
AC160336.1	3.91147e-11	0.3207	0.865	0.715	7.62385e-07
Nrn1	6.34661e-11	-0.292559	0.937	0.971	1.23702e-06
Dusp26	1.16343e-10	0.251691	0.981	0.954	2.26763e-06
C78859	4.08966e-10	0.281019	0.893	0.792	7.97116e-06
Map1a	4.49045e-10	0.257148	0.994	0.98	8.75233e-06
Kcnq1ot1	4.6918e-10	0.34088	0.937	0.867	9.14478e-06
Atf3	2.01088e-09	0.340044	0.705	0.504	3.9194e-05
S100a4	3.31347e-09	-0.543822	0.576	0.704	6.45828e-05
Arxes2	3.37429e-09	0.268284	0.835	0.726	6.57683e-05
Nrxn3	3.52321e-09	0.387684	0.791	0.709	6.86709e-05
Rgs4	5.24904e-09	-0.520084	0.854	0.884	0.000102309
Peg3	5.86443e-09	0.27573	0.997	0.983	0.000114304
Serpinb1b	9.31284e-09	0.318274	0.501	0.351	0.000181517
Cacna2d1	2.37793e-08	0.469059	0.986	0.954	0.000463482
Ncam2	3.31591e-08	0.251916	0.722	0.626	0.000646305
Osbpl3	1.15644e-07	0.294795	0.799	0.75	0.00225402
Nefm	1.35702e-07	0.345211	0.986	0.965	0.00264496
Smad1	1.82845e-07	0.255189	0.835	0.771	0.00356383
Hopx	2.37403e-07	-0.307169	0.361	0.483	0.00462721
Mt1	3.63154e-07	-0.48555	0.882	0.902	0.00707824
Lsamp	5.00069e-07	0.356263	0.78	0.73	0.00974684
Cdkn1a	8.13251e-07	0.337052	0.755	0.646	0.0158511
Dbi	1.18994e-06	-0.410045	0.939	0.959	0.0231931
Kcnma1	1.45861e-06	0.358379	0.89	0.802	0.0284298
Malat1	1.62694e-06	0.403341	1	1	0.0317108
Ly6h	2.21392e-06	0.260815	0.62	0.482	0.0431516

## Sheet: NF1
Gene	p_val	avg_log2FC	pct.1	pct.2	p_val_adj
Rps8	1.2664e-39	0.552354	1	0.997	2.46835e-35
Gal	1.53205e-37	0.294418	0.856	0.267	2.98611e-33
Rps12	9.41775e-33	0.576506	0.977	0.975	1.83561e-28
Ndrg4	1.75837e-31	-0.454585	0.992	1	3.42723e-27
Usmg5	2.67323e-29	-0.521879	0.992	0.997	5.2104e-25
Rpl17	8.94423e-29	0.45175	0.977	0.985	1.74332e-24
Gm8797	6.78032e-28	0.383499	0.773	0.387	1.32155e-23
Rps3a1	3.45408e-27	0.476189	1	0.988	6.73236e-23
Mt3	4.22035e-26	-0.557373	1	1	8.22588e-22
Rps25	2.50446e-25	0.376931	1	0.994	4.88145e-21
Rpl41	4.61737e-25	-0.448465	1	1	8.99972e-21
mt-Nd2	5.21612e-25	0.672369	0.977	1	1.01667e-20
Rpl12	3.96309e-24	0.40142	0.985	0.975	7.72445e-20
mt-Nd4	8.17106e-24	0.536643	0.97	1	1.59262e-19
Rps28	1.00346e-23	-0.392073	0.97	0.988	1.95585e-19
2010107E04Rik	2.99338e-23	-0.429854	1	0.997	5.83439e-19
Rps6	2.32742e-22	0.333032	1	0.991	4.53638e-18
Nts	9.03764e-21	0.436697	0.591	0.166	1.76153e-16
Rpl26	4.09871e-20	0.299114	1	0.994	7.98879e-16
Rps15	1.34465e-18	0.398781	0.992	0.994	2.62085e-14
mt-Nd3	1.70209e-18	0.589974	0.962	0.994	3.31755e-14
mt-Nd1	9.83109e-18	0.489056	0.977	1	1.91618e-13
Atp5e	8.16534e-17	-0.337708	1	0.997	1.59151e-12
Calca	3.92587e-16	-1.03918	0.932	0.972	7.65192e-12
Uqcr11	1.19131e-15	-0.276167	1	1	2.32199e-11
Rps14	3.95108e-15	0.271549	1	0.997	7.70105e-11
mt-Co3	5.76781e-15	0.37085	0.992	1	1.1242e-10
Ndufa1	8.61018e-15	-0.297369	0.992	0.994	1.67821e-10
Rpl23a	3.08797e-14	0.280007	0.992	0.991	6.01876e-10
AC160336.1	6.77789e-14	0.509197	0.962	0.948	1.32108e-09
Rpl37	9.14383e-14	-0.253538	0.992	1	1.78222e-09
Rpl39	1.62238e-13	-0.355583	0.992	0.997	3.16217e-09
Romo1	1.91633e-13	-0.30524	0.992	0.991	3.73511e-09
Cops9	2.32437e-12	-0.283778	0.992	0.997	4.53042e-08
Rps10	1.2543e-11	0.255747	1	0.991	2.44476e-07
mt-Nd4l	1.2678e-11	-0.51567	0.962	0.994	2.47106e-07
Fxyd2	1.42051e-11	-1.02787	0.864	0.972	2.76871e-07
Scd2	1.83633e-11	-0.326343	0.962	1	3.5792e-07
mt-Atp6	3.38343e-11	0.305025	1	1	6.59465e-07
mt-Co2	4.00495e-11	0.270861	0.985	1	7.80606e-07
Trnp1	8.27303e-11	-0.469708	0.985	1	1.6125e-06
Eef1b2	1.18088e-10	0.275324	1	0.988	2.30165e-06
Tomm7	1.40215e-10	-0.271809	0.992	0.991	2.73294e-06
Calm1	1.62192e-10	0.302548	1	1	3.16129e-06
Dhcr24	2.85869e-10	-0.297214	0.932	0.982	5.57188e-06
Cmip	2.94825e-10	0.305838	0.924	0.929	5.74643e-06
Txnl4a	3.09247e-10	0.332973	0.97	0.942	6.02754e-06
Mrpl52	3.63748e-10	-0.264814	0.955	0.972	7.08981e-06
Pcbp3	5.72422e-10	-0.287876	0.939	0.991	1.11571e-05
Ddx24	8.30594e-10	0.274039	0.977	0.985	1.61891e-05
Ebf1	1.56757e-09	-0.343237	0.955	0.991	3.05535e-05
Rab4a	1.62457e-09	-0.286978	0.902	0.963	3.16645e-05
Pttg1	2.26288e-09	-0.274196	0.826	0.902	4.41058e-05
mt-Cytb	4.03134e-09	0.263908	0.992	1	7.85748e-05
Kif22	4.18854e-09	0.297761	0.705	0.457	8.16389e-05
Tmod2	5.94584e-09	-0.252288	0.939	0.985	0.00011589
Itfg1	1.40098e-08	-0.275787	0.947	0.988	0.000273065
Atf3	1.45366e-08	0.466981	0.803	0.537	0.000283334
Rgs4	1.47012e-08	-0.663835	0.894	0.972	0.000286542
Lancl3	1.78725e-08	0.328479	0.705	0.5	0.000348353
Ncl	1.95631e-08	0.274376	0.962	0.951	0.000381305
Gng5	2.10674e-08	-0.311275	0.947	0.954	0.000410624
Slc6a17	2.13317e-08	-0.303843	0.932	0.982	0.000415775
Kcnip3	2.64542e-08	-0.353628	0.856	0.917	0.000515619
Elob	2.90681e-08	-0.251551	1	0.997	0.000566566
Tmem258	3.87946e-08	-0.268413	0.932	0.957	0.000756146
AI413582	4.96077e-08	-0.387932	0.894	0.948	0.000966904
Ppp1r2	5.06065e-08	-0.358167	0.947	0.991	0.000986371
Sdcbp	5.1846e-08	-0.473309	0.962	0.994	0.00101053
Prune2	5.44053e-08	-0.36261	1	0.997	0.00106041
Lpin1	7.53854e-08	-0.258774	0.955	0.991	0.00146934
Stmn2	9.72275e-08	0.345975	1	1	0.00189506
Psmb5	1.04122e-07	0.304371	0.992	0.975	0.00202944
Arhgdia	1.30553e-07	-0.256743	0.962	0.988	0.0025446
Rpl29	1.33187e-07	0.276521	0.947	0.957	0.00259596
Sncg	1.7338e-07	-0.275248	1	1	0.00337934
Wipf3	1.99306e-07	-0.264191	0.886	0.957	0.00388468
Scn4b	2.10884e-07	-0.2838	0.909	0.969	0.00411034
Cda	2.5286e-07	0.315533	0.947	0.954	0.00492849
Isl2	2.75086e-07	-0.261862	0.78	0.896	0.00536171
Stac2	3.38167e-07	-0.334344	0.659	0.764	0.00659122
Parm1	3.78839e-07	-0.285947	0.97	0.994	0.00738395
Ptn	4.04512e-07	0.333816	0.924	0.911	0.00788434
Gnao1	4.79766e-07	-0.387024	0.909	0.982	0.00935111
Jun	4.85823e-07	0.465571	0.894	0.837	0.00946918
Lgi2	5.22337e-07	-0.259695	0.924	0.969	0.0101809
Tusc5	6.84174e-07	-0.473726	0.644	0.813	0.0133352
Nop10	1.12256e-06	-0.253168	1	0.991	0.0218799
Necab2	1.14034e-06	-0.382183	0.515	0.715	0.0222264
Vamp2	1.31375e-06	-0.322655	0.97	0.997	0.0256063
Gfra2	1.36684e-06	-0.324917	0.386	0.595	0.0266412
Plxnc1	1.53643e-06	-0.290655	0.803	0.905	0.0299466
Dgkz	1.73623e-06	-0.440914	0.909	0.96	0.0338408
Cd81	2.26985e-06	-0.313912	0.894	0.945	0.0442416
Prkar1a	2.50781e-06	-0.445579	0.97	0.997	0.0488797

## Sheet: NF2
Gene	p_val	avg_log2FC	p_val_adj
Sprr1a	5.58006e-39	0.361382	1.08761e-34
Rps8	1.07465e-26	0.689982	2.09459e-22
Gal	1.272e-26	1.25755	2.47926e-22
Nts	4.80992e-23	0.527597	9.37502e-19
Gm8797	5.04726e-23	0.412262	9.83762e-19
Mt3	2.13152e-22	-0.751947	4.15454e-18
mt-Nd3	3.15332e-20	0.636173	6.14614e-16
mt-Co3	2.21662e-19	0.671158	4.32042e-15
Rpl41	2.60256e-19	-0.519132	5.07265e-15
mt-Nd2	2.87808e-18	0.670586	5.60966e-14
mt-Nd1	6.36603e-18	0.656646	1.2408e-13
Rpl37	7.23763e-18	-0.412161	1.41069e-13
Rpl17	1.6161e-17	0.485686	3.14995e-13
Rps28	1.66717e-17	-0.465093	3.24948e-13
Rps12	1.86987e-17	0.592775	3.64457e-13
Rpl37a	2.72537e-16	-0.369167	5.31202e-12
Rpl36	3.23242e-16	-0.329314	6.3003e-12
Ubl5	5.74916e-16	-0.466224	1.12057e-11
2010107E04Rik	7.44929e-16	-0.55741	1.45194e-11
Usmg5	4.85065e-15	-0.61924	9.4544e-11
Gap43	2.96133e-14	0.566584	5.77194e-10
Rps25	4.02079e-14	0.297452	7.83693e-10
Rps15	4.0892e-14	0.382355	7.97027e-10
Ndufa3	4.62992e-14	-0.557787	9.02418e-10
Cox17	6.25124e-14	-0.440937	1.21843e-09
Tomm7	1.31602e-13	-0.484649	2.56505e-09
Rpl12	1.64147e-13	0.487377	3.19939e-09
Gm1673	2.11449e-13	-0.322365	4.12136e-09
Sec61g	2.24475e-13	-0.403715	4.37524e-09
Ndufa1	2.25811e-13	-0.463173	4.40129e-09
Rpl26	2.60408e-13	0.339912	5.07561e-09
AC160336.1	3.33924e-13	0.677263	6.50851e-09
Ndufv3	6.41058e-13	-0.469977	1.24949e-08
Rpl23a	1.09526e-12	0.337258	2.13478e-08
Atp5e	1.62246e-12	-0.437214	3.16234e-08
Smad1	1.74349e-12	0.342258	3.39824e-08
Rpl39	1.74711e-12	-0.323456	3.40528e-08
Rpl30	1.78441e-12	-0.306939	3.478e-08
Gabra2	4.88142e-12	-0.411912	9.51438e-08
6330403K07Rik	6.98981e-12	-0.658857	1.36238e-07
Rps14	9.70389e-12	0.256566	1.89139e-07
Cox7c	1.35789e-11	-0.444519	2.64666e-07
Kif21a	1.53348e-11	0.3554	2.9889e-07
Romo1	3.35533e-11	-0.353664	6.53987e-07
mt-Co2	3.49159e-11	0.407554	6.80546e-07
Hsp90ab1	4.51895e-11	0.348537	8.80789e-07
Tmsb10	5.34493e-11	-0.413407	1.04178e-06
Ndrg4	5.72643e-11	-0.422993	1.11614e-06
Sem1	8.07086e-11	-0.353659	1.57309e-06
Vstm2l	1.26057e-10	-0.419432	2.45697e-06
Rpl38	1.32456e-10	-0.313388	2.5817e-06
Mrps21	1.55252e-10	-0.375593	3.02601e-06
Cox6c	2.02197e-10	-0.411687	3.94103e-06
Uqcr11	2.12099e-10	-0.403109	4.13402e-06
mt-Atp6	2.49437e-10	0.407776	4.86178e-06
Hcfc1r1	3.85604e-10	-0.355712	7.51581e-06
Marf1	4.80839e-10	-0.378353	9.37203e-06
Atp5j2	5.28164e-10	-0.371167	1.02944e-05
Cops9	6.69926e-10	-0.327624	1.30575e-05
Hypk	7.24861e-10	-0.311204	1.41283e-05
Atp5l	7.28378e-10	-0.365639	1.41968e-05
Elob	7.91756e-10	-0.357591	1.54321e-05
mt-Nd4	9.52459e-10	0.399464	1.85644e-05
Cox7a2	1.08344e-09	-0.389039	2.11174e-05
Atp6v1g2	1.27754e-09	-0.303873	2.49005e-05
Arpc2	1.40654e-09	0.56175	2.74148e-05
Mrpl52	1.66464e-09	-0.324534	3.24454e-05
Ddx24	1.94208e-09	0.286217	3.78531e-05
Rpl29	2.5341e-09	0.416493	4.93922e-05
Naa38	2.61432e-09	-0.389577	5.09558e-05
Gsk3b	2.76044e-09	0.321746	5.38037e-05
Plxna4	5.94989e-09	0.383876	0.000115969
Ano3	6.71315e-09	-0.419308	0.000130846
Rtl8a	8.7805e-09	-0.304567	0.000171141
Gabarapl2	9.66199e-09	-0.342746	0.000188322
Polr2k	1.03531e-08	-0.34442	0.000201793
Rps6	1.24673e-08	0.269282	0.000243001
Snap25	1.26299e-08	-0.334521	0.00024617
Txnl4a	2.0016e-08	0.383864	0.000390132
Phactr2	2.03665e-08	0.370973	0.000396963
Prune2	2.07341e-08	-0.401125	0.000404129
Rps27	2.23759e-08	-0.286402	0.000436129
Mrpl33	2.31463e-08	-0.294139	0.000451145
Ndufa7	2.32454e-08	-0.30408	0.000453076
Trnp1	2.45552e-08	-0.296911	0.000478606
Srgap1	2.91521e-08	0.315751	0.000568203
Sox11	3.16542e-08	0.834426	0.000616972
Sh3glb1	3.19438e-08	0.370158	0.000622616
Ost4	4.05708e-08	-0.341796	0.000790765
Ppp1r1c	4.81032e-08	-0.37645	0.000937579
Agtpbp1	4.95319e-08	0.305496	0.000965427
Sncg	5.47076e-08	-0.299542	0.0010663
Slc3a2	5.8563e-08	0.257916	0.00114145
Eef1b2	6.31747e-08	0.486299	0.00123134
Eprs	6.49703e-08	0.281859	0.00126634
Uqcr10	6.7182e-08	-0.282113	0.00130945
Stmn2	8.04048e-08	0.360207	0.00156717
Nop10	8.51171e-08	-0.363413	0.00165902
Tubb2b	8.58052e-08	0.716902	0.00167243
Dpysl2	8.72175e-08	-0.333355	0.00169996
Cit	9.55036e-08	0.339353	0.00186146
mt-Nd4l	1.10285e-07	-0.496114	0.00214956
Rpl10	1.67173e-07	0.327675	0.00325838
Pet100	1.70861e-07	-0.274164	0.00333024
Rhoq	1.76051e-07	0.62263	0.00343141
Rpl36al	1.86254e-07	-0.301584	0.00363027
Acp1	2.1955e-07	0.310646	0.00427924
Rps3a1	2.56175e-07	0.307761	0.0049931
Psmd7	2.70407e-07	0.280343	0.00527051
Kif22	3.10251e-07	0.382384	0.00604711
Isl2	3.30332e-07	-0.351622	0.00643849
Ndufa4	3.63781e-07	-0.333439	0.00709045
Cox5b	3.96085e-07	-0.273704	0.00772009
Gdi1	4.21271e-07	-0.269553	0.00821099
Rpl22l1	4.72813e-07	-0.268449	0.0092156
Htr3a	5.18782e-07	-0.393198	0.0101116
Ahnak2	5.22327e-07	0.277037	0.0101807
Cnih4	5.3721e-07	0.270277	0.0104708
Bola3	6.26367e-07	-0.303506	0.0122085
Lix1	6.3394e-07	0.661752	0.0123561
Cfl2	6.56361e-07	0.270059	0.0127931
Snrpn	7.4933e-07	-0.273694	0.0146052
Cox8a	8.23354e-07	-0.273725	0.016048
Kcnab2	1.08603e-06	-0.348894	0.0211677
Epha5	1.1117e-06	0.300345	0.0216681
Tusc2	1.22245e-06	-0.25507	0.0238268
Ndufc1	1.27866e-06	-0.299323	0.0249223
Ndufb3	1.33663e-06	-0.251368	0.0260523
Rapsn	1.82693e-06	-0.255457	0.0356086
Sorl1	1.91352e-06	-0.335193	0.0372964
Usp20	2.04092e-06	-0.282231	0.0397795
Dhrs1	2.27368e-06	0.420413	0.0443164
