# Supplementary material for: scRNA-sequencing reveals subtype-specific transcriptomic perturbations in DRG neurons of PirtEGFPf mice in neuropathic pain condition
Source: eLife. 2022 Oct 20;11:e76063. doi: 10.7554/eLife.76063 (PMC9584610; doi:10.7554/eLife.76063)
Supplement: Supplementary file 6. [file elife-76063-supp6.xlsx]

## Sheet: NP1
Category	Term	Count	%	PValue	Genes	List Total	Pop Hits	Pop Total	Fold Enrichment	Bonferroni	Benjamini	FDR
GOTERM_BP_DIRECT	GO:0006412~translation	26	19.8473	4.99075e-18	RPL5, RPL30, RPL10, RPL12, RPS15, RPS14, RPL36, RACK1, RPL37, RPL17, RPL39, RPS12, RPL41, RPS8, RPS6, RPL35A, MRPS21, RPL23A, MRPL23, MRPL52, RPS28, RPS27, RPS29, RPL37A, EIF3C, RPS21	117	401	18082	10.0205	2.58022e-15	2.58022e-15	2.54029e-15
GOTERM_BP_DIRECT	GO:0015992~proton transport	7	5.34351	1.88729e-06	ATP5E, ATP5J, ATP5H, ATP5G2, ATP5L, ATP6V1F, ATP5J2	117	58	18082	18.6522	0.000975253	0.000487864	0.000480315
GOTERM_BP_DIRECT	GO:0000028~ribosomal small subunit assembly	5	3.81679	8.84557e-06	RPS15, RPS25, RPS14, RPS28, RPS27	117	21	18082	36.7969	0.00456274	0.00115923	0.00114129
GOTERM_BP_DIRECT	GO:0006810~transport	29	22.1374	8.96889e-06	UQCRB, NDUFA11, NDUFB2, ATP5J, UQCR11, UQCR10, ATP5H, ATP5G2, ATP5L, SNX3, ATP5E, NDUFV3, ATP6V1F, ABCA1, GABARAPL2, NDUFA5, NDUFA4, NDUFA3, PRAF2, NDUFA2, NDUFA1, DYNLL1, SNAP91, ATOX1, ATP5J2, NDUFS6, FXYD2, TOMM7, DYNLRB1	117	1822	18082	2.45986	0.0046262	0.00115923	0.00114129
GOTERM_BP_DIRECT	GO:0015986~ATP synthesis coupled proton transport	5	3.81679	1.29583e-05	ATP5E, ATP5J, ATP5H, ATP5G2, ATP5L	117	23	18082	33.5972	0.00667708	0.00133989	0.00131915
GOTERM_BP_DIRECT	GO:1902600~hydrogen ion transmembrane transport	4	3.05344	0.000231277	COX8A, UQCRB, UQCR10, ATP5G2	117	19	18082	32.5362	0.112711	0.0199284	0.01962
GOTERM_BP_DIRECT	GO:0006754~ATP biosynthetic process	4	3.05344	0.000414863	ATP5E, ALDOA, ATP5L, ATP5J2	117	23	18082	26.8777	0.193078	0.0306406	0.0301665
GOTERM_BP_DIRECT	GO:0000027~ribosomal large subunit assembly	4	3.05344	0.000600583	RPL5, RPL10, RPL12, RPL23A	117	26	18082	23.7765	0.266989	0.0388126	0.0382121
GOTERM_BP_DIRECT	GO:0006364~rRNA processing	6	4.58015	0.00131311	RPS15, RPL5, RPS28, RPS6, RPL35A, NOP10	117	126	18082	7.35938	0.49304	0.0691233	0.0680537
GOTERM_BP_DIRECT	GO:0055114~oxidation-reduction process	13	9.92366	0.00133701	NDUFA5, UQCRB, NDUFA11, NDUFA4, NDUFA3, NDUFA2, NDUFA1, NDUFB2, UQCR11, UQCR10, NDUFS6, PRDX1, NDUFV3	117	676	18082	2.97206	0.499273	0.0691233	0.0680537
GOTERM_BP_DIRECT	GO:0046034~ATP metabolic process	4	3.05344	0.00213806	ATP5J, ATP5H, ATP5L, ATP5J2	117	40	18082	15.4547	0.669306	0.100489	0.0989339
GOTERM_BP_DIRECT	GO:0006123~mitochondrial electron transport, cytochrome c to oxygen	3	2.29008	0.00258212	COX8A, COX5B, COX7C	117	12	18082	38.6368	0.737285	0.111246	0.109525
GOTERM_BP_DIRECT	GO:0042274~ribosomal small subunit biogenesis	3	2.29008	0.00649688	RPS15, RPS28, RPS6	117	19	18082	24.4022	0.965605	0.258376	0.254378
GOTERM_BP_DIRECT	GO:0021762~substantia nigra development	3	2.29008	0.0246804	ATP5J, COX6B1, YWHAH	117	38	18082	12.2011	0.999998	0.911411	0.897308
GOTERM_BP_DIRECT	GO:0007409~axonogenesis	4	3.05344	0.0315498	KLF7, UCHL1, MAP1B, SNAP91	117	107	18082	5.77746	1	1	0.986434
GOTERM_BP_DIRECT	GO:0006811~ion transport	9	6.87023	0.0343963	FXYD2, ATP5E, ATP5J, ATP5H, ATP5G2, ATOX1, ATP5L, ATP6V1F, ATP5J2	117	584	18082	2.38172	1	1	0.986434
GOTERM_BP_DIRECT	GO:0047497~mitochondrion transport along microtubule	2	1.52672	0.0378844	MAP1B, KIF1B	117	6	18082	51.5157	1	1	0.986434
GOTERM_BP_DIRECT	GO:0034551~mitochondrial respiratory chain complex III assembly	2	1.52672	0.0501936	UQCRB, UQCR10	117	8	18082	38.6368	1	1	0.986434
GOTERM_BP_DIRECT	GO:0006122~mitochondrial electron transport, ubiquinol to cytochrome c	2	1.52672	0.0802877	UQCRB, UQCR10	117	13	18082	23.7765	1	1	0.986434
GOTERM_BP_DIRECT	GO:0050765~negative regulation of phagocytosis	2	1.52672	0.0861921	SNX3, RACK1	117	14	18082	22.0781	1	1	0.986434
GOTERM_BP_DIRECT	GO:0007399~nervous system development	6	4.58015	0.0954324	GAL, MAP1B, DPYSL3, TRNP1, NBL1, ELAVL3	117	377	18082	2.45963	1	1	0.986434
GOTERM_BP_DIRECT	GO:2000649~regulation of sodium ion transmembrane transporter activity	2	1.52672	0.0978884	FXYD2, YWHAH	117	16	18082	19.3184	1	1	0.986434
GOTERM_BP_DIRECT	GO:0030490~maturation of SSU-rRNA	2	1.52672	0.0978884	RPS14, RPS28	117	16	18082	19.3184	1	1	0.986434

## Sheet: PEP5
Category	Term	Count	%	PValue	Genes	List Total	Pop Hits	Pop Total	Fold Enrichment	Bonferroni	Benjamini	FDR
GOTERM_BP_DIRECT	GO:0006412~translation	35	16.2037	6.96181e-21	RPL5, RPL10, RPL12, EPRS, MRPL55, MRPL33, EEF1B2, RPS15, RPS14, RPL36AL, RPL36, RPL38, RPL37, RPL17, RPL39, RPS12, RPL41, RPS8, RPS6, RPL35A, MRPS21, RPL23A, MRPL52, LARS2, RPS28, RPS27, RPS29, RPS3A1, RPL37A, RPL22L1, FAU, EIF3F, RPL29, RPS21, EIF3A	197	401	18082	8.01132	7.83204e-18	7.83204e-18	7.79027e-18
GOTERM_BP_DIRECT	GO:0055114~oxidation-reduction process	25	11.5741	3.34376e-07	UQCRB, NDUFA11, MRPS36, NDUFB3, NDUFB2, UQCR11, UQCR10, NDUFV3, NDUFV2, NDUFA7, GPX4, NDUFA5, NDUFA4, NDUFA3, NDUFA2, NDUFA1, NDUFC2, NDUFC1, SDHD, HIGD2A, TMX4, UQCRQ, NDUFS6, NDUFS5, CYCS	197	676	18082	3.39448	0.000376102	0.000188087	0.000187083
GOTERM_BP_DIRECT	GO:0006810~transport	43	19.9074	1.80089e-06	VCP, UQCRB, NDUFA11, NDUFB3, NDUFB2, ATP5K, ATP5J, UQCR11, SLC2A3, DBI, UQCR10, ATP5L, SNX3, ATP5E, NDUFV3, NDUFV2, GABARAPL2, NDUFA7, PRELID1, NDUFA5, NDUFA4, CACNA2D1, OSBPL3, NDUFA3, NDUFA2, NDUFA1, ATP2B4, NDUFC2, NDUFC1, ATP2B1, SDHD, DYNLL1, ATOX1, ATP5J2, HIGD2A, TMX4, UQCRQ, NDUFS6, NDUFS5, FXYD2, KCNMA1, TOMM7, EXOC3	197	1822	18082	2.16621	0.00202395	0.000675335	0.000671733
GOTERM_BP_DIRECT	GO:0006120~mitochondrial electron transport, NADH to ubiquinone	5	2.31481	6.19155e-06	NDUFA7, BDNF, NDUFS6, NDUFC2, NDUFV2	197	12	18082	38.2445	0.00694132	0.00174137	0.00173209
GOTERM_BP_DIRECT	GO:0000028~ribosomal small subunit assembly	5	2.31481	6.93479e-05	RPS15, RPS25, RPS14, RPS28, RPS27	197	21	18082	21.854	0.0750533	0.0156033	0.0155201
GOTERM_BP_DIRECT	GO:0006123~mitochondrial electron transport, cytochrome c to oxygen	4	1.85185	0.000256738	COX8A, CYCS, COX5B, COX7C	197	12	18082	30.5956	0.250888	0.0481383	0.0478816
GOTERM_BP_DIRECT	GO:0006122~mitochondrial electron transport, ubiquinol to cytochrome c	4	1.85185	0.000331099	UQCRB, UQCRQ, CYCS, UQCR10	197	13	18082	28.2421	0.311023	0.0532123	0.0529285
GOTERM_BP_DIRECT	GO:0007399~nervous system development	13	6.01852	0.000868648	NRN1, BDNF, PTEN, SOX11, DLL3, ELAVL3, PURA, GAP43, MAP1B, DPYSL3, NDUFV2, CAMK2G, ITM2C	197	377	18082	3.16506	0.623807	0.112709	0.112108
GOTERM_BP_DIRECT	GO:0046034~ATP metabolic process	5	2.31481	0.000901672	VCP, ATP5K, ATP5J, ATP5L, ATP5J2	197	40	18082	11.4734	0.637539	0.112709	0.112108
GOTERM_BP_DIRECT	GO:0006754~ATP biosynthetic process	4	1.85185	0.00189301	ATP5E, ATP5K, ATP5L, ATP5J2	197	23	18082	15.9629	0.881359	0.193603	0.192571
GOTERM_BP_DIRECT	GO:0015986~ATP synthesis coupled proton transport	4	1.85185	0.00189301	ATP5E, ATP5K, ATP5J, ATP5L	197	23	18082	15.9629	0.881359	0.193603	0.192571
GOTERM_BP_DIRECT	GO:0000027~ribosomal large subunit assembly	4	1.85185	0.0027136	RPL5, RPL10, RPL12, RPL23A	197	26	18082	14.121	0.952969	0.2544	0.253043
GOTERM_BP_DIRECT	GO:0015992~proton transport	5	2.31481	0.00359803	ATP5E, ATP5K, ATP5J, ATP5L, ATP5J2	197	58	18082	7.91266	0.982666	0.311368	0.309707
GOTERM_BP_DIRECT	GO:0002181~cytoplasmic translation	4	1.85185	0.00586154	RPL36, RPL35A, RPL22L1, RPL29	197	34	18082	10.7984	0.998658	0.471017	0.468505
GOTERM_BP_DIRECT	GO:0030534~adult behavior	4	1.85185	0.00800617	MAFG, PTEN, NRXN3, NRXN2	197	38	18082	9.66177	0.999882	0.600463	0.597261
GOTERM_BP_DIRECT	GO:0043066~negative regulation of apoptotic process	14	6.48148	0.00892333	JUN, CDKN1A, PRELID1, HSP90AB1, BDNF, RPS6, STAT3, PTEN, MT3, HIGD2A, AHI1, RPS3A1, GNAQ, NAA38	197	566	18082	2.27034	0.999958	0.627421	0.624075
GOTERM_BP_DIRECT	GO:0050765~negative regulation of phagocytosis	3	1.38889	0.00976399	SNX3, SYT11, PTEN	197	14	18082	19.6686	0.999984	0.646147	0.642701
GOTERM_BP_DIRECT	GO:0006364~rRNA processing	6	2.77778	0.0120886	RPS15, RPL5, RPS28, RPS6, RPL35A, NOP10	197	126	18082	4.3708	0.999999	0.754589	0.750565
GOTERM_BP_DIRECT	GO:0007416~synapse assembly	4	1.85185	0.0127442	BDNF, PTEN, NRXN3, NRXN2	197	45	18082	8.15883	0.999999	0.754589	0.750565
GOTERM_BP_DIRECT	GO:0098779~mitophagy in response to mitochondrial depolarization	6	2.77778	0.0145424	COX8A, MAP1A, ATPIF1, TOMM7, NEFM, SNRPF	197	132	18082	4.17213	1	0.818013	0.81365
GOTERM_BP_DIRECT	GO:0042274~ribosomal small subunit biogenesis	3	1.38889	0.0177086	RPS15, RPS28, RPS6	197	19	18082	14.4927	1	0.905551	0.900722
GOTERM_BP_DIRECT	GO:1902600~hydrogen ion transmembrane transport	3	1.38889	0.0177086	COX8A, UQCRB, UQCR10	197	19	18082	14.4927	1	0.905551	0.900722
GOTERM_BP_DIRECT	GO:0071709~membrane assembly	2	0.925926	0.0215621	ANK3, SPTBN1	197	2	18082	91.7868	1	1	0.995552
GOTERM_BP_DIRECT	GO:1902895~positive regulation of pri-miRNA transcription from RNA polymerase II promoter	3	1.38889	0.0234203	SMAD1, JUN, STAT3	197	22	18082	12.5164	1	1	0.995552
GOTERM_BP_DIRECT	GO:0009987~cellular process	3	1.38889	0.0275909	JUN, PTTG1, MAP1B	197	24	18082	11.4734	1	1	0.995552
GOTERM_BP_DIRECT	GO:0007409~axonogenesis	5	2.31481	0.0291337	KLF7, UCHL1, NRN1, MAP1B, ANK3	197	107	18082	4.2891	1	1	0.995552
GOTERM_BP_DIRECT	GO:0043524~negative regulation of neuron apoptotic process	6	2.77778	0.0303659	PCP4, JUN, HSP90AB1, BDNF, MT1, MT3	197	160	18082	3.44201	1	1	0.995552
GOTERM_BP_DIRECT	GO:0072661~protein targeting to plasma membrane	3	1.38889	0.0320352	ANK2, ANK3, SPTBN1	197	26	18082	10.5908	1	1	0.995552
GOTERM_BP_DIRECT	GO:1903984~positive regulation of TRAIL-activated apoptotic signaling pathway	2	0.925926	0.0321691	PTEN, ATF3	197	3	18082	61.1912	1	1	0.995552
GOTERM_BP_DIRECT	GO:0000398~mRNA splicing, via spliceosome	5	2.31481	0.0336512	UBL5, LSM7, SNRPN, SNRPE, SNRPF	197	112	18082	4.09763	1	1	0.995552
GOTERM_BP_DIRECT	GO:0070373~negative regulation of ERK1 and ERK2 cascade	4	1.85185	0.0348737	PTEN, DUSP26, EIF3A, ATF3	197	66	18082	5.56284	1	1	0.995552
GOTERM_BP_DIRECT	GO:0007269~neurotransmitter secretion	3	1.38889	0.0367397	SNAP25, NRXN3, NRXN2	197	28	18082	9.8343	1	1	0.995552
GOTERM_BP_DIRECT	GO:0031647~regulation of protein stability	4	1.85185	0.0404417	DPM3, TOMM7, PTEN, ANK2	197	70	18082	5.24496	1	1	0.995552
GOTERM_BP_DIRECT	GO:0010975~regulation of neuron projection development	3	1.38889	0.041691	SNAP25, DPYSL3, PTEN	197	30	18082	9.17868	1	1	0.995552
GOTERM_BP_DIRECT	GO:1901660~calcium ion export	2	0.925926	0.0426616	ATP2B4, ATP2B1	197	4	18082	45.8934	1	1	0.995552
GOTERM_BP_DIRECT	GO:0007412~axon target recognition	2	0.925926	0.0426616	UCHL1, BDNF	197	4	18082	45.8934	1	1	0.995552
GOTERM_BP_DIRECT	GO:0050821~protein stabilization	5	2.31481	0.0507089	GNAQ, PTEN, ANK2, PFN1, MT3	197	128	18082	3.58542	1	1	0.995552
GOTERM_BP_DIRECT	GO:0006875~cellular metal ion homeostasis	2	0.925926	0.053041	MT1, MT3	197	5	18082	36.7147	1	1	0.995552
GOTERM_BP_DIRECT	GO:0006979~response to oxidative stress	5	2.31481	0.0568517	GPX4, NDUFB4, CAMK2G, MT3, ATOX1	197	133	18082	3.45063	1	1	0.995552
GOTERM_BP_DIRECT	GO:0032543~mitochondrial translation	3	1.38889	0.0579016	LARS2, NDUFA7, MRPS21	197	36	18082	7.6489	1	1	0.995552
GOTERM_BP_DIRECT	GO:2001171~positive regulation of ATP biosynthetic process	2	0.925926	0.0633084	VCP, STAT3	197	6	18082	30.5956	1	1	0.995552
GOTERM_BP_DIRECT	GO:0010976~positive regulation of neuron projection development	5	2.31481	0.0633764	SNX3, AHI1, NDRG4, PCP4, DPYSL3	197	138	18082	3.32561	1	1	0.995552
GOTERM_BP_DIRECT	GO:0006366~transcription from RNA polymerase II promoter	5	2.31481	0.0633764	JUN, STAT3, HIVEP2, POLR2I, POLR2K	197	138	18082	3.32561	1	1	0.995552
GOTERM_BP_DIRECT	GO:0010628~positive regulation of gene expression	9	4.16667	0.0695636	SMAD1, AHI1, MAFG, STAT3, SOX11, ANK2, ANK3, MT3, ATF3	197	399	18082	2.07038	1	1	0.995552
GOTERM_BP_DIRECT	GO:0071229~cellular response to acid chemical	2	0.925926	0.0734651	BDNF, ENO1	197	7	18082	26.2248	1	1	0.995552
GOTERM_BP_DIRECT	GO:0075522~IRES-dependent viral translational initiation	2	0.925926	0.0734651	EIF3F, EIF3A	197	7	18082	26.2248	1	1	0.995552
GOTERM_BP_DIRECT	GO:0007411~axon guidance	5	2.31481	0.0790404	MEG3, KLF7, GAP43, BDNF, ANK3	197	149	18082	3.08009	1	1	0.995552
GOTERM_BP_DIRECT	GO:0034551~mitochondrial respiratory chain complex III assembly	2	0.925926	0.0835121	UQCRB, UQCR10	197	8	18082	22.9467	1	1	0.995552
GOTERM_BP_DIRECT	GO:0014009~glial cell proliferation	2	0.925926	0.0835121	SOX11, DBI	197	8	18082	22.9467	1	1	0.995552
GOTERM_BP_DIRECT	GO:0007265~Ras protein signal transduction	3	1.38889	0.0920597	JUN, RALA, CDKN1A	197	47	18082	5.85873	1	1	0.995552
GOTERM_BP_DIRECT	GO:0001778~plasma membrane repair	2	0.925926	0.0934508	SYT11, AHNAK2	197	9	18082	20.3971	1	1	0.995552
GOTERM_BP_DIRECT	GO:0060291~long-term synaptic potentiation	3	1.38889	0.09878	SNAP25, PTEN, DBI	197	49	18082	5.6196	1	1	0.995552

## Sheet: NF1
Category	Term	Count	%	PValue	Genes	List Total	Pop Hits	Pop Total	Fold Enrichment	Bonferroni	Benjamini	FDR
GOTERM_BP_DIRECT	GO:0006412~translation	17	20.4819	4.22947e-12	RPL41, RPS8, RPL12, RPS6, RPL23A, MRPL52, EEF1B2, RPS15, RPS14, RPS28, RPS3A1, RPL26, RPL37, RPL29, RPL39, RPL17, RPS12	74	401	18082	10.359	2.07246e-09	2.07244e-09	2.07244e-09
GOTERM_BP_DIRECT	GO:0000028~ribosomal small subunit assembly	5	6.0241	1.3889e-06	RPS15, RPS25, RPS14, RPS28, RPS10	74	21	18082	58.1789	0.00068033	0.000340281	0.000340281
GOTERM_BP_DIRECT	GO:0006364~rRNA processing	5	6.0241	0.00168803	RPS15, RPS28, RPS6, RPL26, NOP10	74	126	18082	9.69648	0.563005	0.257691	0.257691
GOTERM_BP_DIRECT	GO:0061024~membrane organization	4	4.81928	0.00210727	RAB4A, DHCR24, CALM1, VAMP2	74	63	18082	15.5144	0.644295	0.257691	0.257691
GOTERM_BP_DIRECT	GO:0042274~ribosomal small subunit biogenesis	3	3.61446	0.0026295	RPS15, RPS28, RPS6	74	19	18082	38.5818	0.724771	0.257691	0.257691
GOTERM_BP_DIRECT	GO:0009987~cellular process	3	3.61446	0.00418914	GNAO1, JUN, PTTG1	74	24	18082	30.5439	0.872162	0.342113	0.342113
GOTERM_BP_DIRECT	GO:0007265~Ras protein signal transduction	3	3.61446	0.0154564	SDCBP, JUN, DHCR24	74	47	18082	15.5969	0.999516	1	1
GOTERM_BP_DIRECT	GO:0031953~negative regulation of protein autophosphorylation	2	2.40964	0.0435349	JUN, GFRA2	74	11	18082	44.4275	1	1	1

## Sheet: NF2
Category	Term	Count	%	PValue	Genes	List Total	Pop Hits	Pop Total	Fold Enrichment	Bonferroni	Benjamini	FDR
GOTERM_BP_DIRECT	GO:0006412~translation	28	23.5294	2.04084e-21	RPL30, RPL10, RPL12, EPRS, MRPL33, EEF1B2, RPS15, RPS14, RPL36AL, RPL36, RPL38, RPL37, RPL17, RPL39, RPS12, RPL41, RPS8, RPS6, MRPS21, RPL23A, MRPL52, RPS28, RPS27, RPS3A1, RPL37A, RPL22L1, RPL26, RPL29	107	401	18082	11.7998	1.23267e-18	1.23267e-18	1.2245e-18
GOTERM_BP_DIRECT	GO:0000028~ribosomal small subunit assembly	5	4.20168	6.18338e-06	RPS15, RPS25, RPS14, RPS28, RPS27	107	21	18082	40.2359	0.00372781	0.00186738	0.00185501
GOTERM_BP_DIRECT	GO:0002181~cytoplasmic translation	4	3.36134	0.00102663	RPL36, RPL22L1, RPL26, RPL29	107	34	18082	19.8813	0.462273	0.186576	0.18534
GOTERM_BP_DIRECT	GO:0007399~nervous system development	9	7.56303	0.0016935	EPHA5, GSK3B, GAP43, GAL, DPYSL2, TRNP1, SOX11, PLXNA4, CIT	107	377	18082	4.03426	0.640751	0.186576	0.18534
GOTERM_BP_DIRECT	GO:0006810~transport	22	18.4874	0.00186524	GABRA2, GABARAPL2, NDUFA7, ATP6V1G2, NDUFA4, NDUFA3, NDUFB3, NDUFA1, UQCR11, SLC3A2, NDUFC1, HTR3A, UQCR10, KCNAB2, SORL1, ATP5L, ATP5J2, ANO3, ATP5E, TOMM7, NDUFV3, CNIH4	107	1822	18082	2.0405	0.676209	0.186576	0.18534
GOTERM_BP_DIRECT	GO:0055114~oxidation-reduction process	12	10.084	0.00204019	NDUFA7, GDI1, NDUFA4, NDUFA3, NDUFB3, NDUFA1, UQCR11, NDUFC1, KCNAB2, UQCR10, NDUFV3, DHRS1	107	676	18082	2.99983	0.708738	0.186576	0.18534
GOTERM_BP_DIRECT	GO:0006123~mitochondrial electron transport, cytochrome c to oxygen	3	2.52101	0.00216231	COX8A, COX5B, COX7C	107	12	18082	42.2477	0.72949	0.186576	0.18534
GOTERM_BP_DIRECT	GO:0015992~proton transport	4	3.36134	0.00478194	ATP6V1G2, ATP5E, ATP5L, ATP5J2	107	58	18082	11.6545	0.944713	0.361037	0.358646
GOTERM_BP_DIRECT	GO:0042274~ribosomal small subunit biogenesis	3	2.52101	0.00545451	RPS15, RPS28, RPS6	107	19	18082	26.6827	0.963247	0.366058	0.363634
GOTERM_BP_DIRECT	GO:0006364~rRNA processing	5	4.20168	0.00646296	RPS15, RPS28, RPS6, RPL26, NOP10	107	126	18082	6.70598	0.980085	0.390363	0.387777
GOTERM_BP_DIRECT	GO:0006754~ATP biosynthetic process	3	2.52101	0.00794805	ATP5E, ATP5L, ATP5J2	107	23	18082	22.0423	0.991932	0.43642	0.43353
GOTERM_BP_DIRECT	GO:0000027~ribosomal large subunit assembly	3	2.52101	0.0100941	RPL10, RPL12, RPL23A	107	26	18082	19.4989	0.997819	0.508069	0.504704
GOTERM_BP_DIRECT	GO:0010975~regulation of neuron projection development	3	2.52101	0.0133068	SNAP25, GSK3B, DPYSL2	107	30	18082	16.8991	0.999694	0.618255	0.614161
GOTERM_BP_DIRECT	GO:0042220~response to cocaine	3	2.52101	0.0208631	HSP90AB1, DPYSL2, HTR3A	107	38	18082	13.3414	0.999997	0.900095	0.894134
GOTERM_BP_DIRECT	GO:0050672~negative regulation of lymphocyte proliferation	2	1.68067	0.0346664	GAL, SOX11	107	6	18082	56.3302	1	1	0.995025
GOTERM_BP_DIRECT	GO:0007411~axon guidance	4	3.36134	0.0572864	EPHA5, GAP43, DPYSL2, PLXNA4	107	149	18082	4.53666	1	1	0.995025
GOTERM_BP_DIRECT	GO:0050774~negative regulation of dendrite morphogenesis	2	1.68067	0.0626436	GSK3B, CIT	107	11	18082	30.7256	1	1	0.995025
GOTERM_BP_DIRECT	GO:0030516~regulation of axon extension	2	1.68067	0.0790428	GSK3B, DPYSL2	107	14	18082	24.1415	1	1	0.995025
GOTERM_BP_DIRECT	GO:0033617~mitochondrial respiratory chain complex IV assembly	2	1.68067	0.0790428	PET100, COX17	107	14	18082	24.1415	1	1	0.995025
GOTERM_BP_DIRECT	GO:1903955~positive regulation of protein targeting to mitochondrion	3	2.52101	0.0801355	SH3GLB1, UBL5, TOMM7	107	80	18082	6.33715	1	1	0.995025
GOTERM_BP_DIRECT	GO:0030490~maturation of SSU-rRNA	2	1.68067	0.0898174	RPS14, RPS28	107	16	18082	21.1238	1	1	0.995025
GOTERM_BP_DIRECT	GO:0046887~positive regulation of hormone secretion	2	1.68067	0.0898174	SNAP25, SOX11	107	16	18082	21.1238	1	1	0.995025
GOTERM_BP_DIRECT	GO:0048485~sympathetic nervous system development	2	1.68067	0.0951578	SOX11, PLXNA4	107	17	18082	19.8813	1	1	0.995025
