# Supplementary material for: scRNA-sequencing reveals subtype-specific transcriptomic perturbations in DRG neurons of PirtEGFPf mice in neuropathic pain condition
Source: eLife. 2022 Oct 20;11:e76063. doi: 10.7554/eLife.76063 (PMC9584610; doi:10.7554/eLife.76063)
Supplement: Supplementary file 7. [file elife-76063-supp7.xlsx]

## Sheet: FemaleOnly
Gnpda2
Snx7
Mt1
Cst3
Gm4208
Olfm1
Bdnf
Rpl29
Calcb
Sorl1
Trpa1
Atox1
Neat1
Arl4c
H3f3b
Nop10
Snhg11
AI413582
2010107E04Rik
Rgs7bp
Apoe
Cpe
Irs2
Hcfc1r1
Crh
Rps8
Adam11
mt-Nd2
Cox5b
Kcnc4
Gfra2
Rps28
Aqp1
Gm7271
Bex1
Atp2b1
Alcam
Pirt
AY036118
Onecut2
Atp5e
Fkbp1b
Socs3
Tm9sf2
Rpl12
Uqcr11
Neto1
S100a13
Lxn
Inhbb
Nap1l5
Ybx1
Lrrn1
Cartpt
Ly6g
Phactr2
Ctsl
Trp53i11
Pls3
Tomm7
Ddah1
Nmb
Ttll7
Crip1
Rpl41
Adcyap1
Rit2
Sh3glb1
Hopx
Rarres1
Peg3
Ptn
Ly6a
Rab3a
Pla2g7
Carhsp1
Th
Myo10
Rps27

## Sheet: MaleOnly
Cystm1
Htr1f
Wfdc3
Ncam1
Iah1
Gfra3
Il31ra
Cnn3
Anxa2
mt-Nd4l
Camk2a
Btbd3
Serpina3n
Cnbp
Hist1h1c
Fgf1
Arpc1b
Nptx1
Gng2
Mrgpra3
Tomm70a
Mef2c
Blvrb
Mindy4b-ps
Paqr5
Fst
Pdlim1
Arl6ip1
Slc17a6
Smim3
Zyx
Ctla2a
Car3
Pkib
1700003F12Rik
Ifrd1
Mgat4b
Ahnak2
Mpped2
Pde6d
Atf4
Spop
Arl6ip5
Txn1
Magi3
Tshz2
Ddt
Gpr139
Fam102b
Eid1
Plekha6
Ttc9b
Pdlim7
Pde4c
Cd44
Car8
Cd59a
Ret
Ano3
Ngfr
Ap2m1
Arrb1
Fam178b
Ndrg1
Timp3
Mical1
Camk2d
Rnase4
Mif
Plxna4
Tesc
Nefm
Ctsd
Taldo1
Prdx2
Gnal
mt-Nd3
Tubb4a
Adarb1
Cryba2
Akap12
Ly86
Kcnh7
S100a16
Plcb3
2010111I01Rik

## Sheet: MaleFemaleOverlap
Qdpr
Dnm3
Eef1b2
Cavin3
Emp3
Chl1
Ldb2
Dtnbp1
Fstl1
S100b
Serpinb1a
Mei1
Hsd17b7
Stmn4
Kit
Pmp22
Kif5c
Kcnab2
Odc1
Trnp1
Nppb
Crip2
Pitpnc1
Calca
Dkk3
Thy1
Marcks
Nrn1
Bnip3
Tubb3
Ppp1r1c
Tubb2b
Cds2
Tspo
Sh3glb2
Malat1
Nedd4l
Ucn
Npy
S100a11
Fgf3
Sox11
Cacna2d1
Csf1
Enah
Sdc1
Sez6l
Rnh1
Ndufv3
Hspb1
Cd47
Ank3
Isl2
Phlda1
Ptms
Cplx2
Nrsn1
Tmem176b
Rgcc
Rhoq
Lynx1
Tmsb4x
Htr3a
Acpp
Lgals1
Sema6a
Itga7
Tusc5
Basp1
Mal2
Kif22
Gadd45a
Fez1
S100a6
S100a4
F2rl2
Mtus2
Jun
Rtn4
Usmg5
Ada
Parm1
Smim5
Mid1ip1
Crmp1
Fam89a
Ppef1
Cd63
Flrt3
Hist1h2bc
Gadd45g
Nts
Cysltr2
Ass1
Cd55
Lmo7
1700025G04Rik
Syt4
Pcp4
Vim
Tspan17
Tpd52
Abca1
Tubb2a
Nsg1
Ift122
Tgfb1
Slc9a3r2
Stmn1
6330403K07Rik
Mal
Ppp1r2
Tubb6
Cited2
Fxyd7
Prkca
Rgs4
Tagln2
Prss12
Cd24a
Scn10a
Hpca
9230105E05Rik
Ppp2r2b
Ecel1
Aspscr1
Resp18
Sst
Ifit1
Gm13889
Cdkn1a
Mmp16
Jak1
Tle1
Esd
Tsc22d1
Phf24
Clic1
Hpcal1
Sprr1a
Dgkz
Nrip1
Arhgdig
Fxyd2
Apba2
Tspan8
Dusp26
Camk1
Cyb5r1
Chst2
Dhrs1
Hs6st2
Fgf13
Scg2
Tmem79
Mthfd2
Tmem233
Srxn1
Arpc2
Vgf
Plxnc1
Cmtm8
Grina
Etv1
Tmem176a
Cd9
Mt3
Osbpl3
Anks1b
Tac1
Gfra1
Scn11a
Tuba1a
Ly6h
Klf6
Hsbp1l1
Fam171b
Selenok
Raly
Phgdh
Nefl
Meg3
Skp1a
Pxdc1
Col5a3
Jpt1
Cpne3
Rph3a
Gal
Atp1b1
Gm525
Dok4
Lgals3
Gap43
Anxa5
Lix1
S100a10
Osmr
Ldhb
Cd82
Fgf12
Adk
Ddit3
Tnik
Vstm2l
Fabp5
Snap25
Tnfrsf12a
Dgkh
Bcat1
Hjurp
Stmn2
Rgs10
AC160336.1
Prdm12
Gm42418
Atf3
